# Supplementary material for: Shearinines U–Y, indole diterpenoids from an entomogenous fungus, Penicillium sp.
Source: Royal Society of Chemistry journal article supplement (doi:10.1039/d4ra08249d), 2025-01-01

## Supporting Information

### **Shearinines U–Y, indole diterpenoids from an entomogenous fungus *Penicillium* sp.**

Peinan Fu,<sup>a</sup> Feng Guo,<sup>a</sup> Tingnan Zhou,<sup>b</sup> Hongxia Bei,<sup>a</sup> Huiling Tang,<sup>a</sup> Jiaxin Li<sup>a</sup> and  
Zhiyang Lv<sup>\*a</sup>

#### **Affiliation**

<sup>a</sup> School of pharmacy, Jiangsu Food and Pharmaceutical Science College, Huaian 223003, People's Republic of China

<sup>b</sup> Institute of Medicinal Biotechnology, Chinese Academy of Medical Sciences & Peking Union Medical College, Beijing 100730, People's Republic of China

#### **Correspondence**

\* To whom correspondence should be addressed.

Zhiyang Lv. E-mail: lvpharm@163.com.

| Contents                                                                                                                     | Page |
|------------------------------------------------------------------------------------------------------------------------------|------|
| 1) <b>Figure S1.</b> $^1\text{H}$ NMR spectrum of shearinine U ( <b>2</b> ); 600 MHz, $\text{DMSO-}d_6$ )                    | 5    |
| 2) <b>Figure S2.</b> $^{13}\text{C}$ NMR spectrum of shearinine U ( <b>2</b> ); 150 MHz, $\text{DMSO-}d_6$ )                 | 6    |
| 3) <b>Figure S3.</b> HSQC spectrum of shearinine U ( <b>2</b> ); 600 MHz, $\text{DMSO-}d_6$ )                                | 7    |
| 4) <b>Figure S4.</b> $^1\text{H-}^1\text{H}$ COSY spectrum of shearinine U ( <b>2</b> ); 600 MHz, $\text{DMSO-}d_6$ )        | 8    |
| 5) <b>Figure S5.</b> HMBC spectrum of shearinine U ( <b>2</b> ); 600 MHz, $\text{DMSO-}d_6$ )                                | 9    |
| 6) <b>Figure S6.</b> NOESY spectrum of shearinine U ( <b>2</b> ); 600 MHz, $\text{DMSO-}d_6$ )                               | 10   |
| 7) <b>Figure S7.</b> HRESIMS spectrum of shearinine U ( <b>2</b> )                                                           | 11   |
| 8) <b>Figure S8.</b> IR spectrum of shearinine U ( <b>2</b> )                                                                | 12   |
| 9) <b>Figure S9.</b> UV spectrum of shearinine U ( <b>2</b> ) in MeOH                                                        | 13   |
| 10) <b>Figure S10.</b> ECD spectrum of <b>2</b> in MeOH                                                                      | 13   |
| 11) <b>Figure S11.</b> Relative configurations and the optimized conformers for <b>2</b>                                     | 14   |
| 12) <b>Figure S12.</b> $^1\text{H}$ NMR spectrum of shearinine V ( <b>3</b> ); 600 MHz, $\text{DMSO-}d_6$ )                  | 15   |
| 13) <b>Figure S13.</b> $^{13}\text{C}$ NMR spectrum of shearinine V ( <b>3</b> ); 150 MHz, $\text{DMSO-}d_6$ )               | 16   |
| 14) <b>Figure S14.</b> HSQC spectrum of shearinine V ( <b>3</b> ); 600 MHz, $\text{DMSO-}d_6$ )                              | 17   |
| 15) <b>Figure S15.</b> $^1\text{H-}^1\text{H}$ COSY spectrum of shearinine V ( <b>3</b> ); (2); 600 MHz, $\text{DMSO-}d_6$ ) | 18   |
| 16) <b>Figure S16.</b> HMBC spectrum of shearinine V ( <b>3</b> ); 600 MHz, $\text{DMSO-}d_6$ )                              | 19   |
| 17) <b>Figure S17.</b> NOESY spectrum of shearinine V ( <b>3</b> ); 600 MHz, $\text{DMSO-}d_6$ )                             | 20   |
| 18) <b>Figure S18.</b> HRESIMS spectrum of shearinine V ( <b>3</b> )                                                         | 21   |
| 19) <b>Figure S19.</b> IR spectrum of shearinine V ( <b>3</b> )                                                              | 22   |

|                                                                                                                                |    |
|--------------------------------------------------------------------------------------------------------------------------------|----|
| 20) <b>Figure S20.</b> UV spectrum of shearinine V (3) in MeOH                                                                 | 23 |
| 21) <b>Figure S21.</b> ECD spectrum of 3 in MeOH                                                                               | 23 |
| 22) <b>Figure S22.</b> <sup>1</sup> H NMR spectrum of shearinine W (4; 600 MHz, DMSO- <i>d</i> <sub>6</sub> )                  | 24 |
| 23) <b>Figure S23.</b> <sup>13</sup> C NMR spectrum of shearinine W (4; 150 MHz, DMSO- <i>d</i> <sub>6</sub> )                 | 25 |
| 24) <b>Figure S24.</b> HSQC spectrum of shearinine W (4; 600 MHz, DMSO- <i>d</i> <sub>6</sub> )                                | 26 |
| 25) <b>Figure S25.</b> <sup>1</sup> H- <sup>1</sup> H COSY spectrum of shearinine W (4; 600 MHz, DMSO- <i>d</i> <sub>6</sub> ) | 27 |
| 26) <b>Figure S26.</b> HMBC spectrum of shearinine W (4; 600 MHz, DMSO- <i>d</i> <sub>6</sub> )                                | 28 |
| 27) <b>Figure S27.</b> NOESY spectrum of shearinine W (4; 600 MHz, DMSO- <i>d</i> <sub>6</sub> )                               | 29 |
| 28) <b>Figure S28.</b> HRESIMS spectrum of shearinine W (4)                                                                    | 30 |
| 29) <b>Figure S29.</b> IR spectrum of shearinine W (4)                                                                         | 31 |
| 30) <b>Figure S30.</b> UV spectrum of shearinine W (4) in MeOH                                                                 | 32 |
| 31) <b>Figure S31.</b> ECD spectrum of 4 in MeOH                                                                               | 32 |
| 32) <b>Figure S32.</b> Relative configurations and the optimized conformers for 4                                              | 33 |
| 33) <b>Figure S33.</b> <sup>1</sup> H NMR spectrum of shearinine X (5; 600 MHz, DMSO- <i>d</i> <sub>6</sub> )                  | 34 |
| 34) <b>Figure S34.</b> <sup>13</sup> C NMR spectrum of shearinine X (5; 150 MHz, DMSO- <i>d</i> <sub>6</sub> )                 | 35 |
| 35) <b>Figure S35.</b> HSQC spectrum of shearinine X (5; 600 MHz, DMSO- <i>d</i> <sub>6</sub> )                                | 36 |
| 36) <b>Figure S36.</b> <sup>1</sup> H- <sup>1</sup> H COSY spectrum of shearinine X (5; 600 MHz, DMSO- <i>d</i> <sub>6</sub> ) | 37 |
| 37) <b>Figure S37.</b> HMBC spectrum of shearinine X (5; 600 MHz, DMSO- <i>d</i> <sub>6</sub> )                                | 38 |
| 38) <b>Figure S38.</b> NOESY spectrum of shearinine X (5; 600 MHz, DMSO- <i>d</i> <sub>6</sub> )                               | 39 |
| 39) <b>Figure S39.</b> HRESIMS spectrum of shearinine X (5)                                                                    | 40 |

|                                                                                                                           |    |
|---------------------------------------------------------------------------------------------------------------------------|----|
| 40) <b>Figure S40.</b> IR spectrum of shearinine X ( <b>5</b> )                                                           | 41 |
| 41) <b>Figure S41.</b> UV spectrum of shearinine X ( <b>5</b> ) in MeOH                                                   | 42 |
| 42) <b>Figure S42.</b> ECD spectrum of <b>5</b> in MeOH                                                                   | 42 |
| 43) <b>Figure S43.</b> Relative configurations and the optimized conformers for <b>5</b>                                  | 43 |
| 44) <b>Figure S44.</b> $^1\text{H}$ NMR spectrum of shearinine Y ( <b>6</b> ; 600 MHz, $\text{DMSO-}d_6$ )                | 44 |
| 45) <b>Figure S45.</b> $^{13}\text{C}$ NMR spectrum of shearinine Y ( <b>6</b> ; 150 MHz, $\text{DMSO-}d_6$ )             | 45 |
| 46) <b>Figure S46.</b> HSQC spectrum of shearinine Y ( <b>6</b> ; 600 MHz, $\text{DMSO-}d_6$ )                            | 46 |
| 47) <b>Figure S47.</b> $^1\text{H-}^1\text{H}$ COSY spectrum of shearinine Y ( <b>6</b> ; 600 MHz, $\text{DMSO-}d_6$ )    | 47 |
| 48) <b>Figure S48.</b> HMBC spectrum of shearinine Y ( <b>6</b> ; 600 MHz, $\text{DMSO-}d_6$ )                            | 48 |
| 49) <b>Figure S49.</b> NOESY spectrum of shearinine Y ( <b>6</b> ; 600 MHz, $\text{DMSO-}d_6$ )                           | 49 |
| 50) <b>Figure S50.</b> HRESIMS spectrum of shearinine Y ( <b>6</b> )                                                      | 50 |
| 51) <b>Figure S51.</b> IR spectrum of shearinine Y ( <b>6</b> )                                                           | 51 |
| 52) <b>Figure S52.</b> UV spectrum of shearinine Y ( <b>6</b> ) in MeOH                                                   | 52 |
| 53) <b>Figure S53.</b> ECD spectrum of <b>6</b> in MeOH                                                                   | 52 |
| 54) <b>Figure S54.</b> Relative configurations and the optimized conformers for <b>6</b>                                  | 53 |
| 55) <b>Figure S55.</b> $^1\text{H}$ NMR spectrum of 22,23-dehydro-shearinine A ( <b>1</b> ; 600 MHz, $\text{CDCl}_3$ )    | 54 |
| 56) <b>Figure S56.</b> $^{13}\text{C}$ NMR spectrum of 22,23-dehydro-shearinine A ( <b>1</b> ; 150 MHz, $\text{CDCl}_3$ ) | 55 |
| 57) <b>Scheme S1.</b> Hypothetical biosynthetic pathways for <b>1-6</b>                                                   | 56 |

**Figure S1.**  $^1\text{H}$  NMR Spectrum of Shearinine U (**2**; 600 MHz,  $\text{DMSO-}d_6$ )

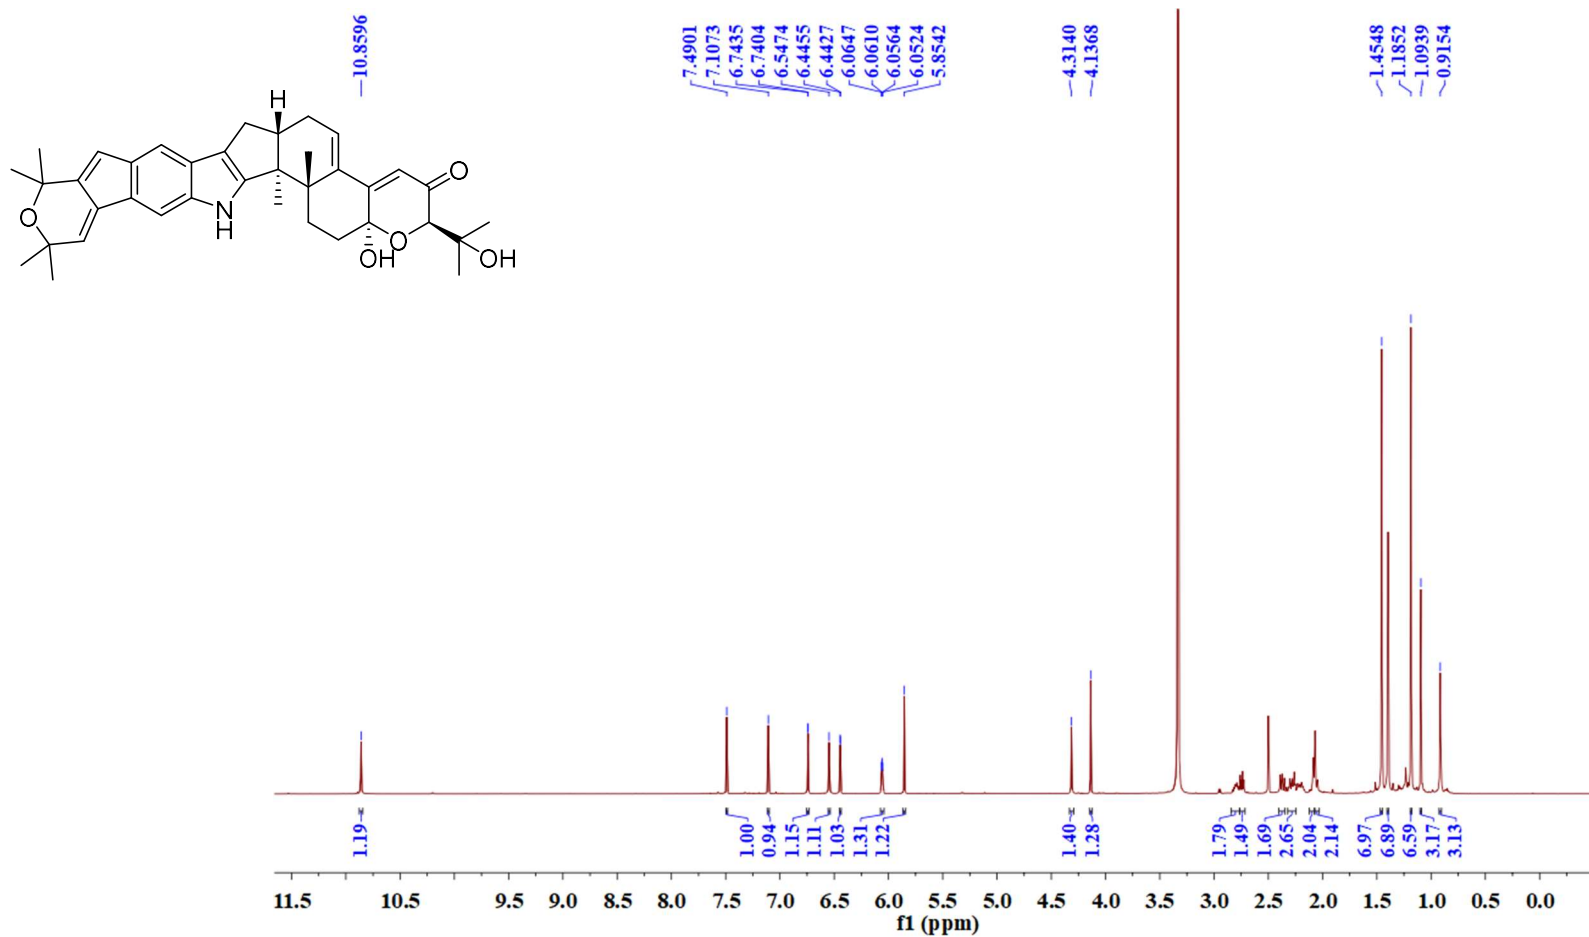

Figure S2.  $^{13}\text{C}$  NMR Spectrum of Shearinine U (2; 150 MHz, DMSO- $d_6$ )

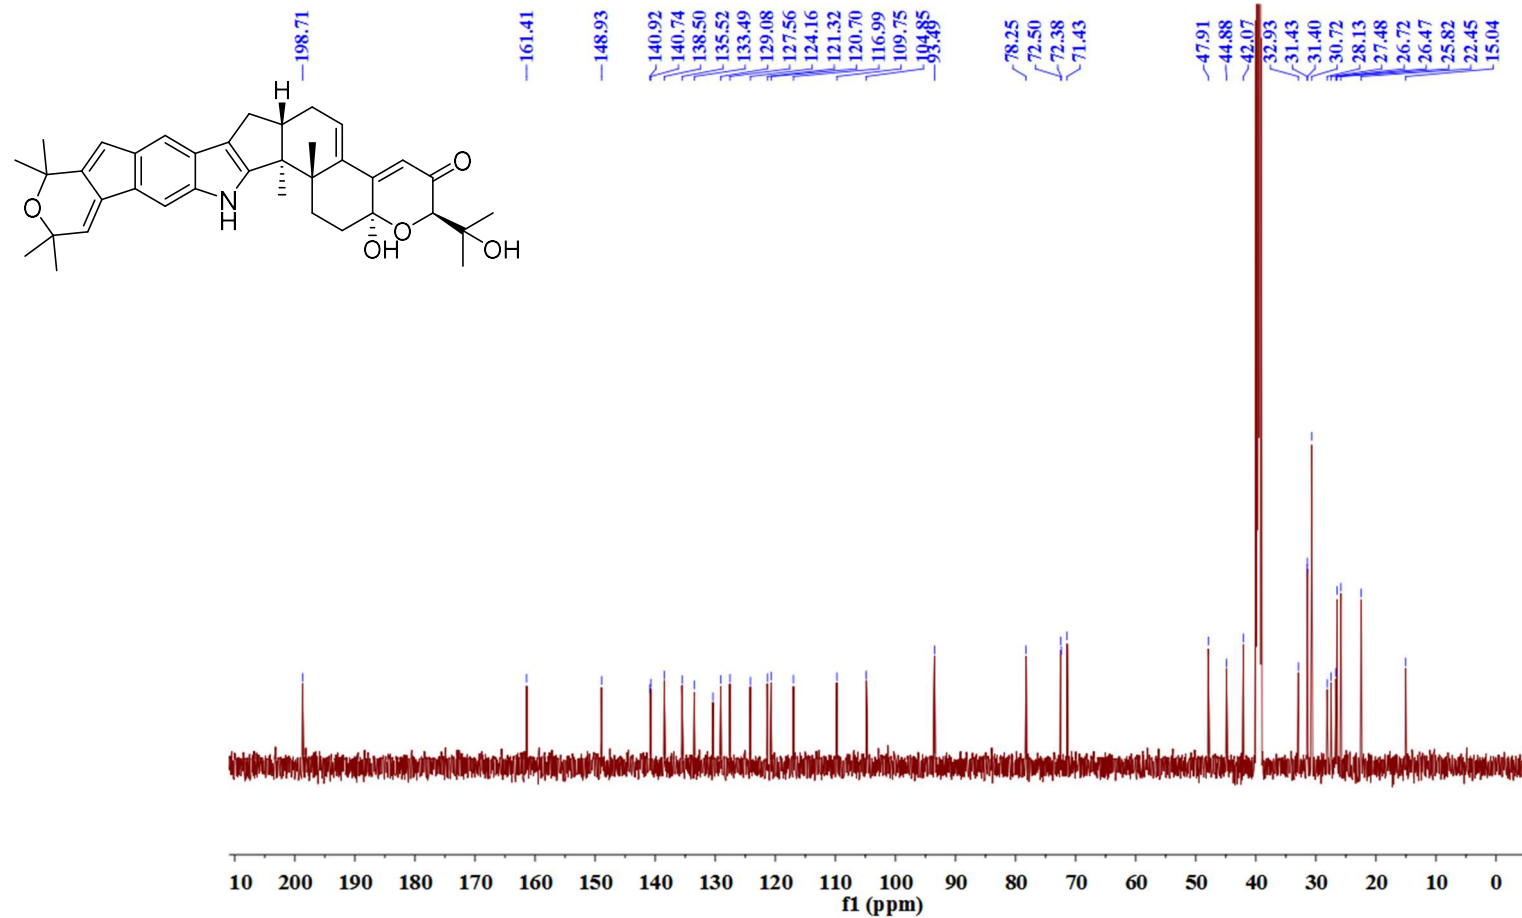

**Figure S3.** HSQC Spectrum of Shearinine U (**2**; 600 MHz, DMSO-*d*<sub>6</sub>)

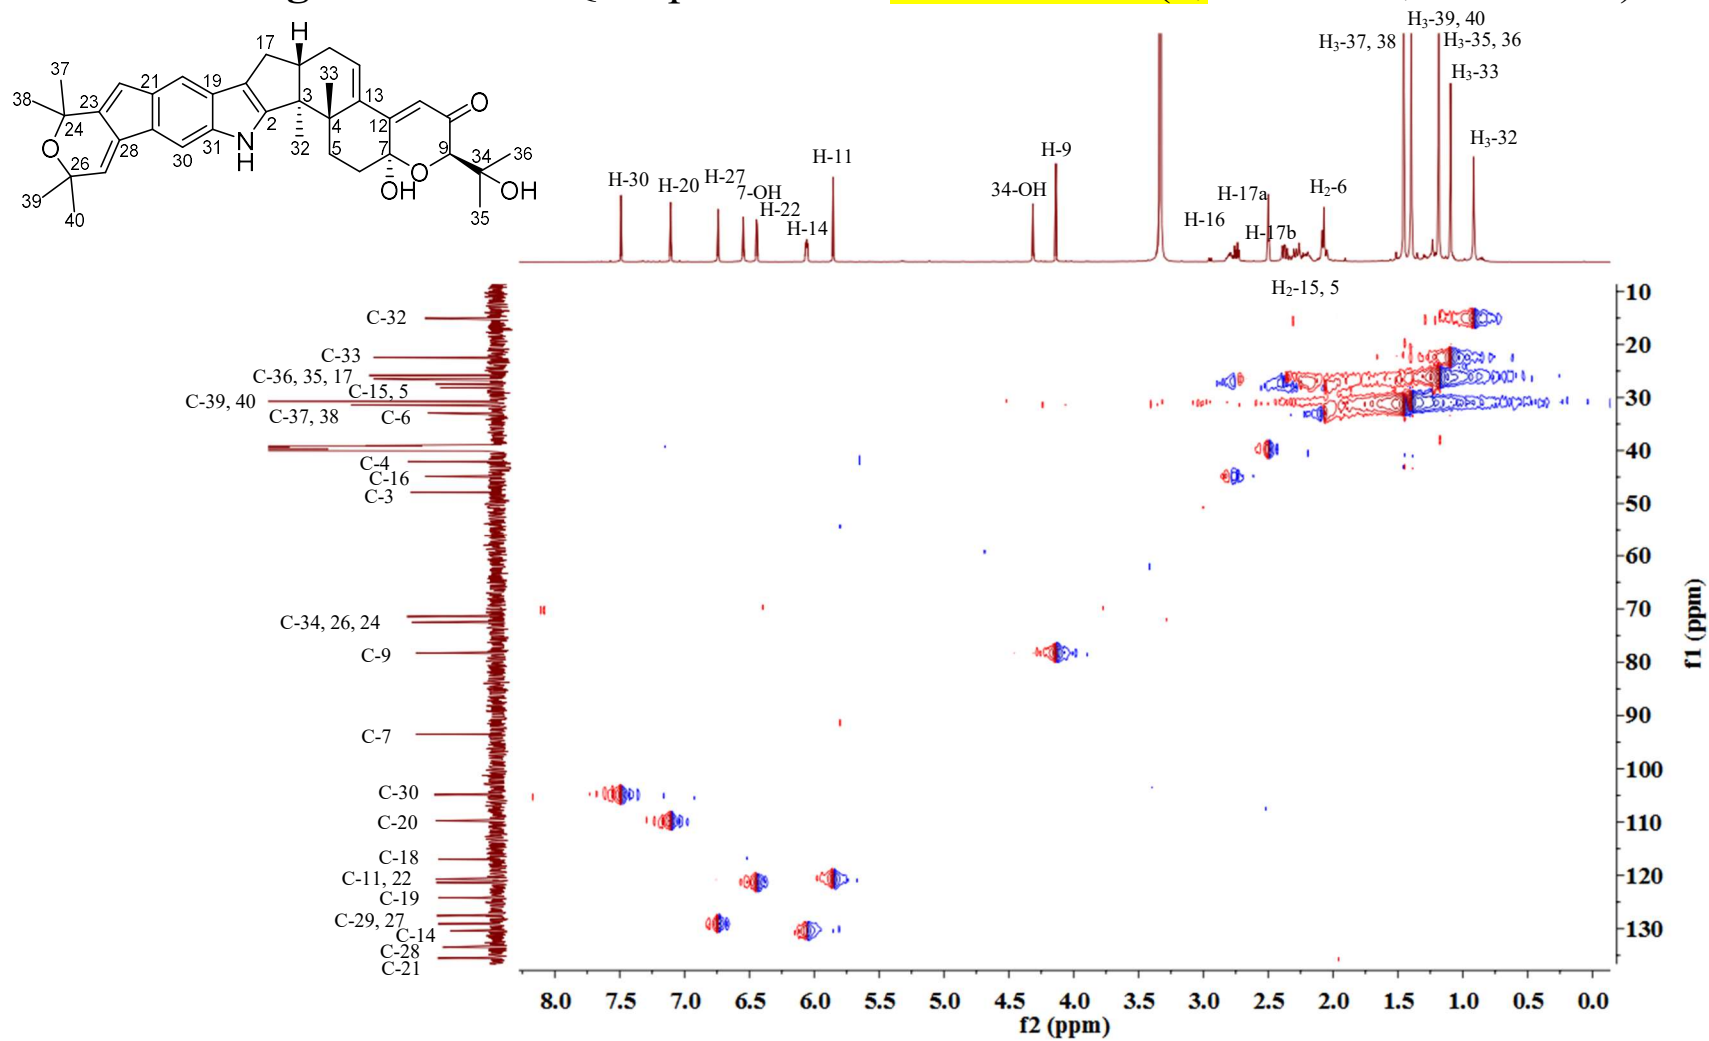

**Figure S4.**  $^1\text{H}$ - $^1\text{H}$  COSY Spectrum of Shearinine U (**2**; 600 MHz,  $\text{DMSO-}d_6$ )

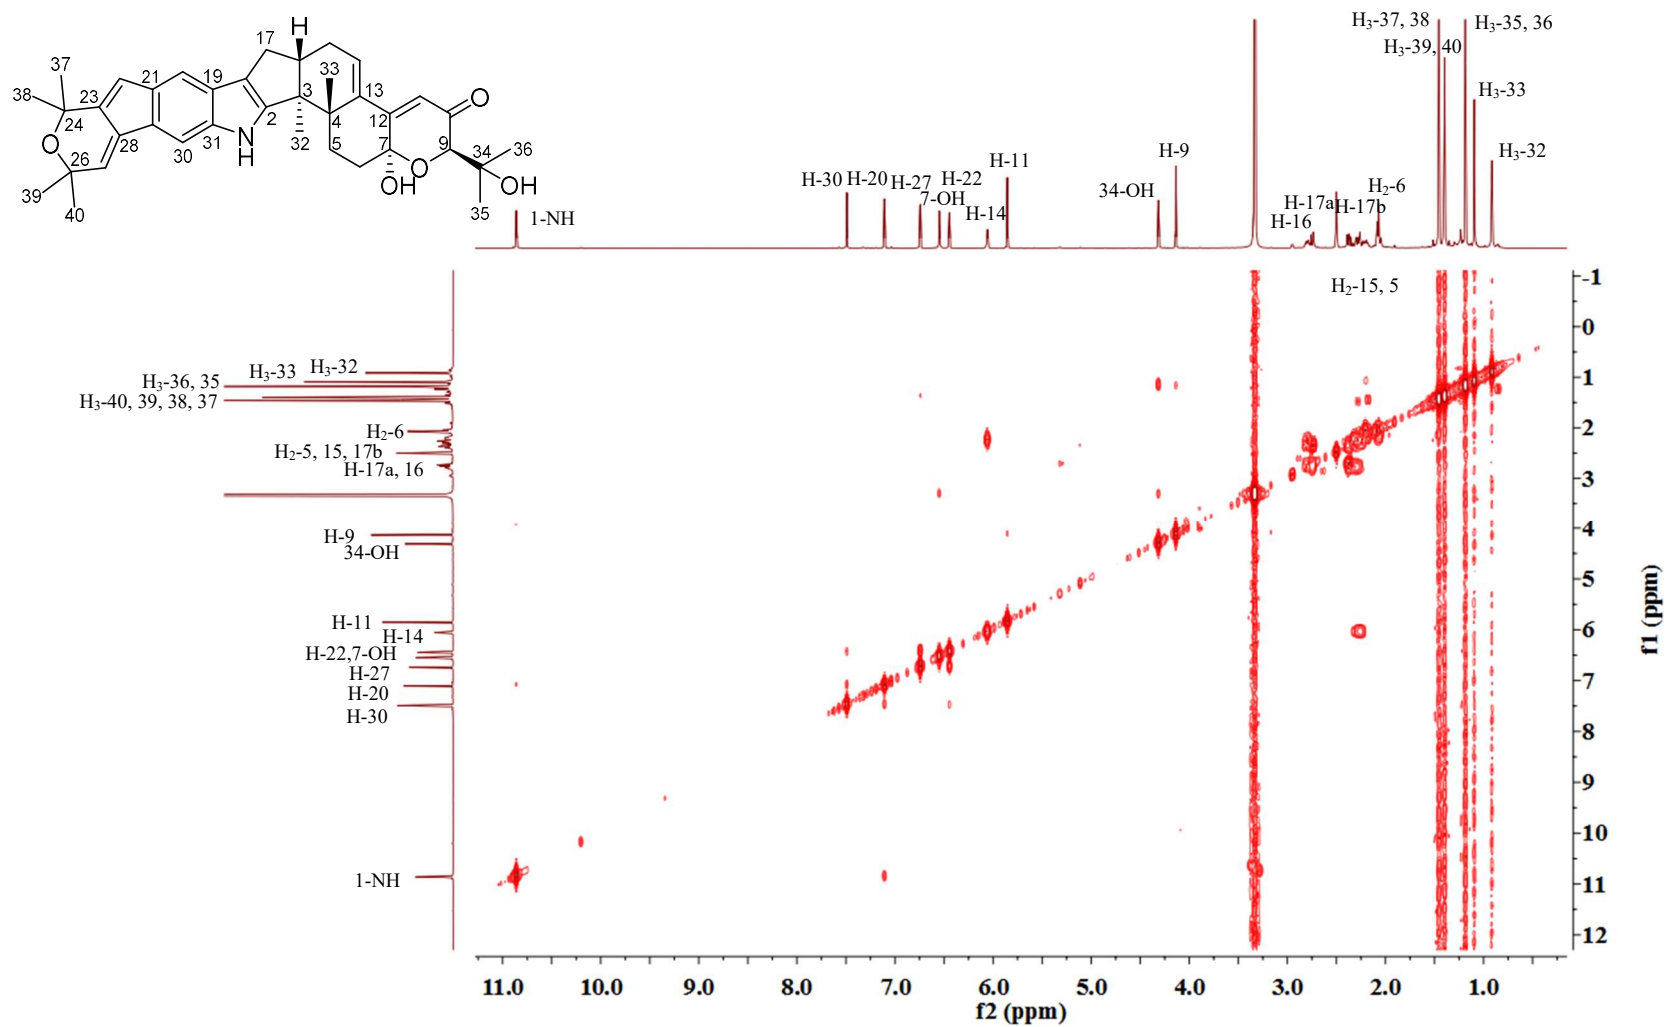



**Figure S5.** HMBC Spectrum of Shearinine U (2; 600 MHz, DMSO-*d*<sub>6</sub>)

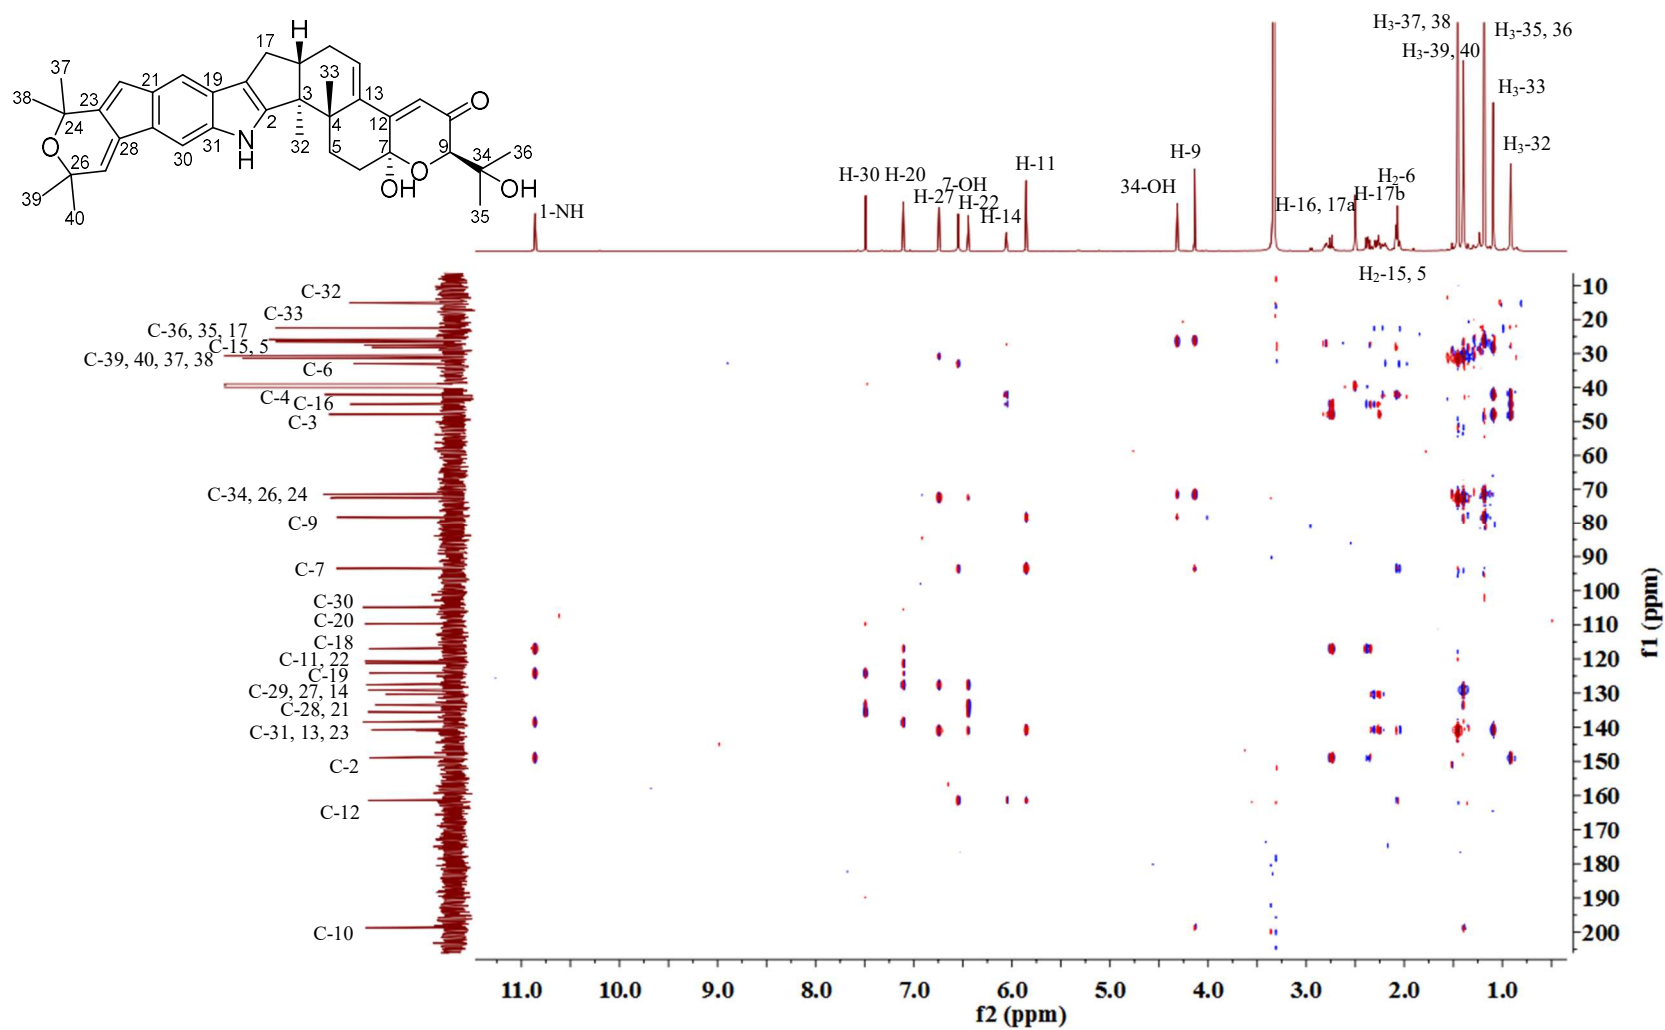

**Figure S6.** NOESY Spectrum of **Shearinine U (2)**; 600 MHz, DMSO-*d*<sub>6</sub>)

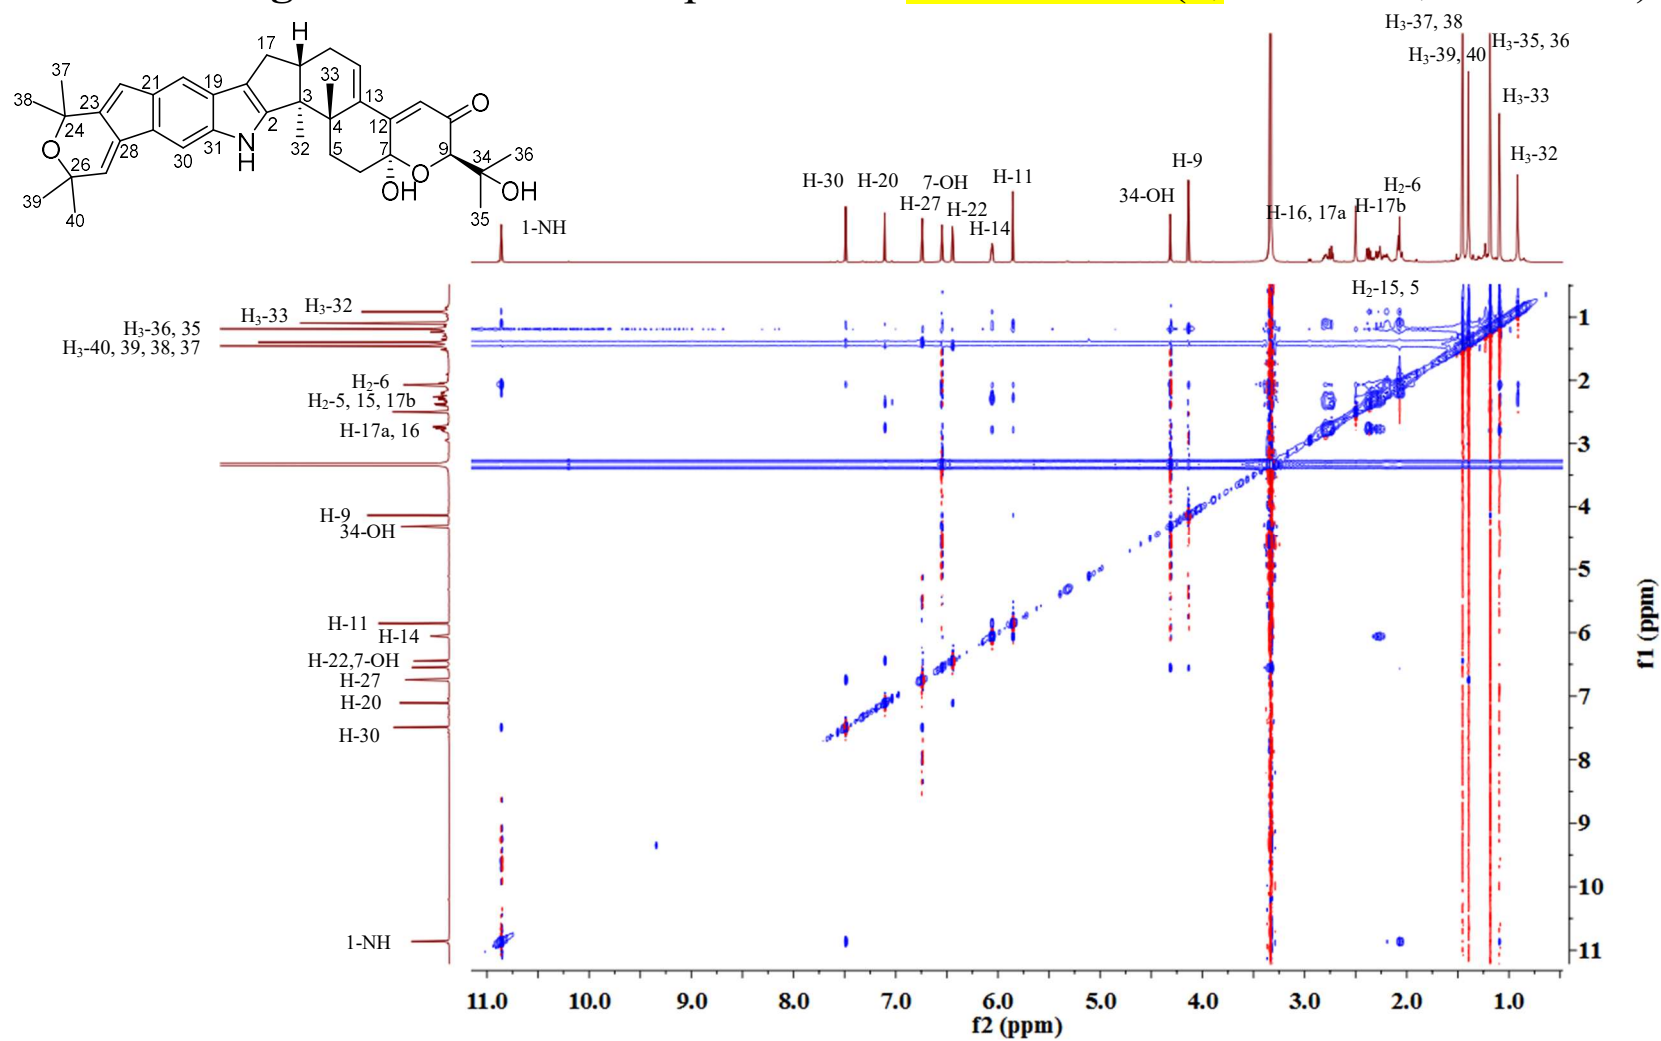

**Figure S7.** HRESIMS Spectrum of Shearinine U (2)

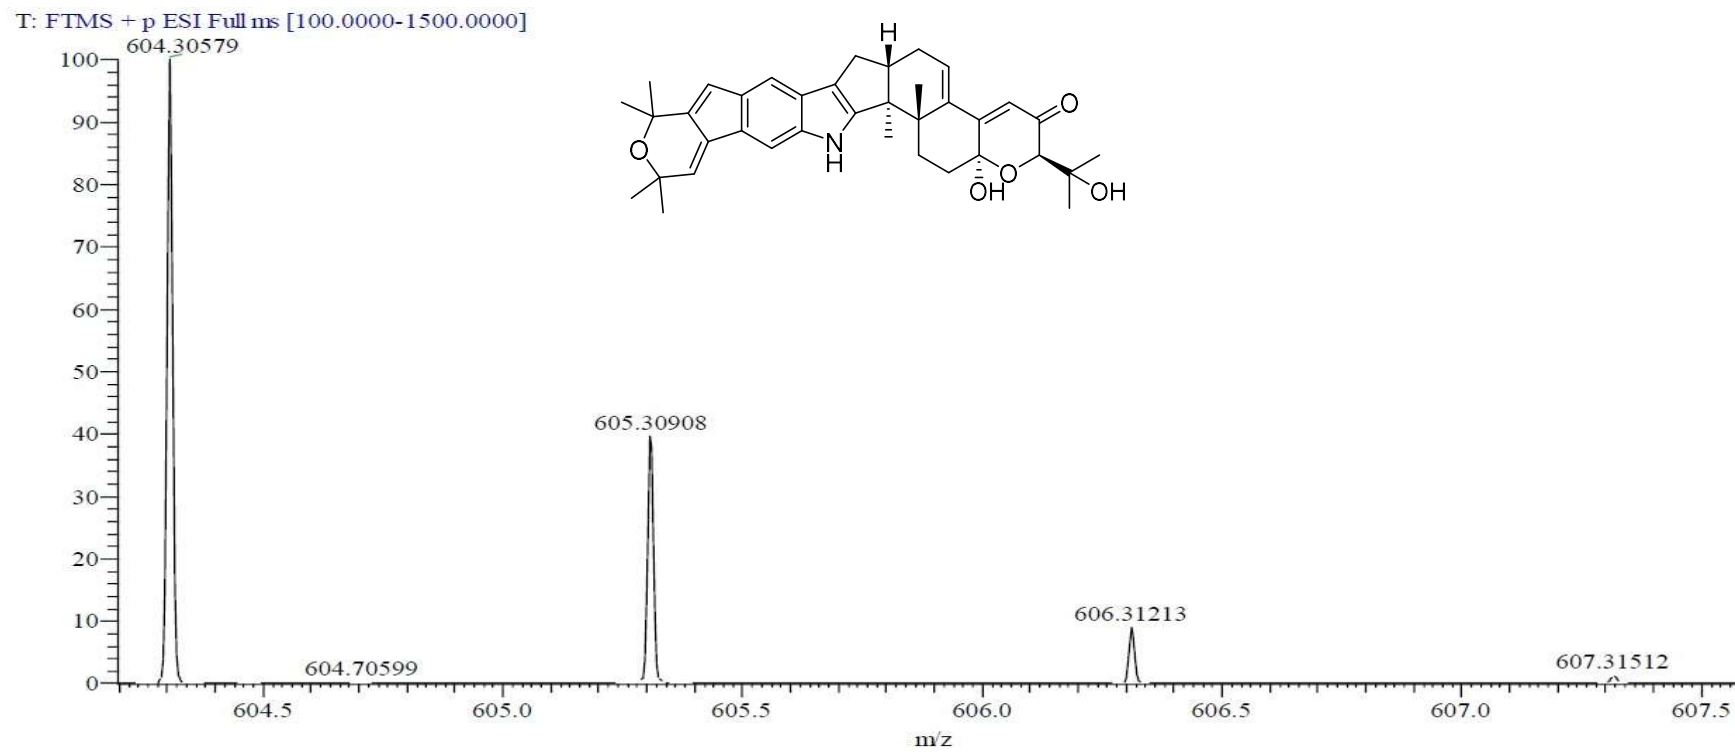

Figure S8. IR Spectrum of Shearinine U (2)

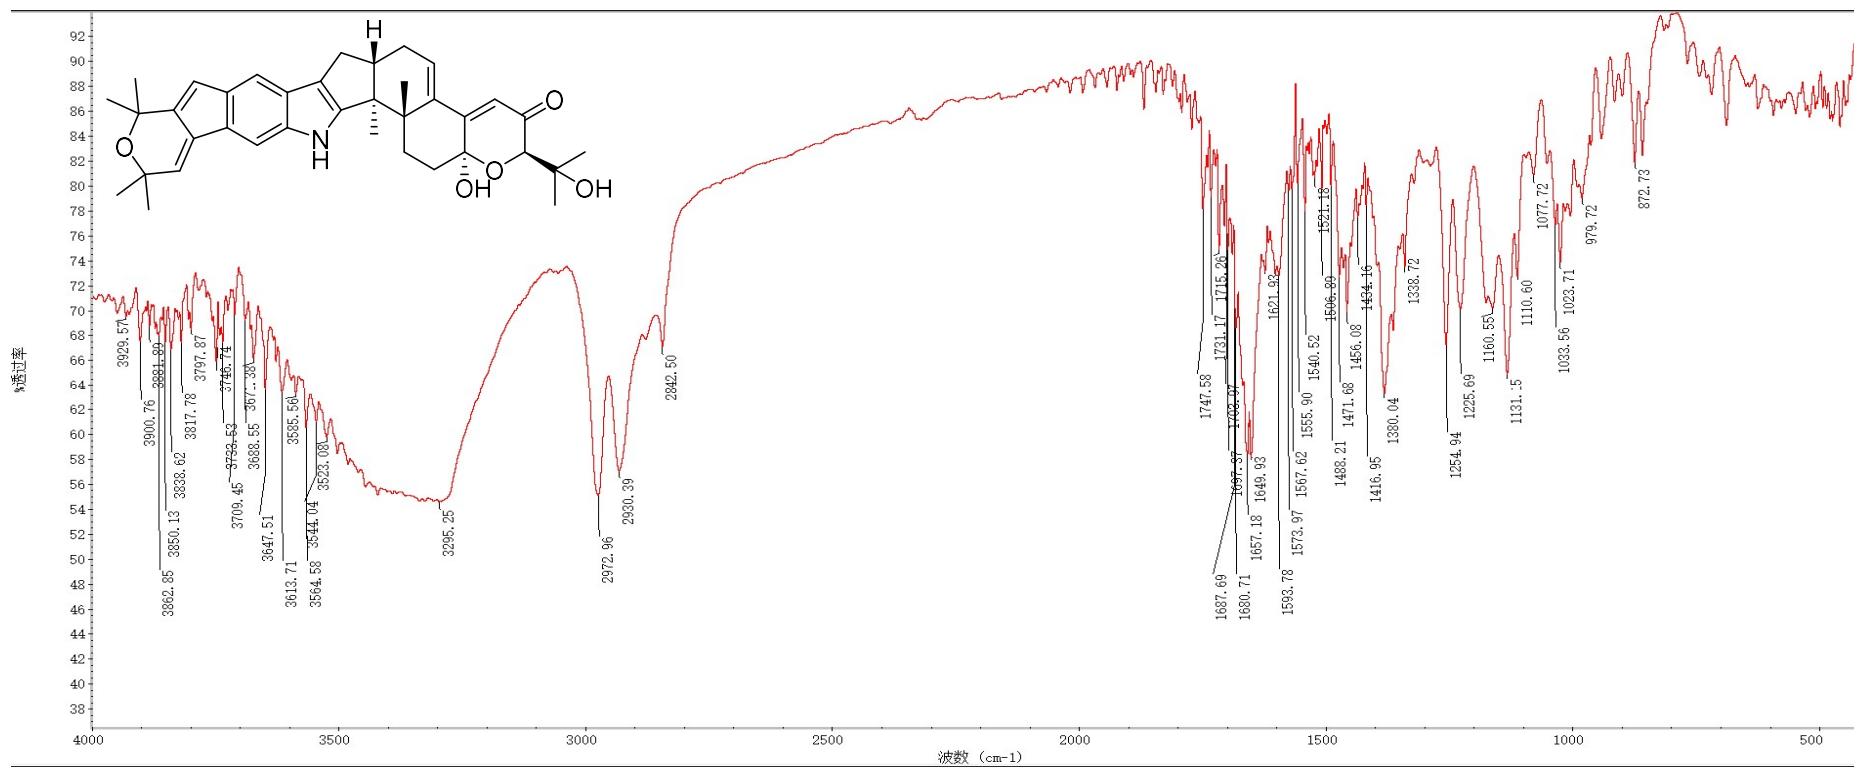

**Figure S9.** UV Spectrum of Shearinine U (2) in MeOH

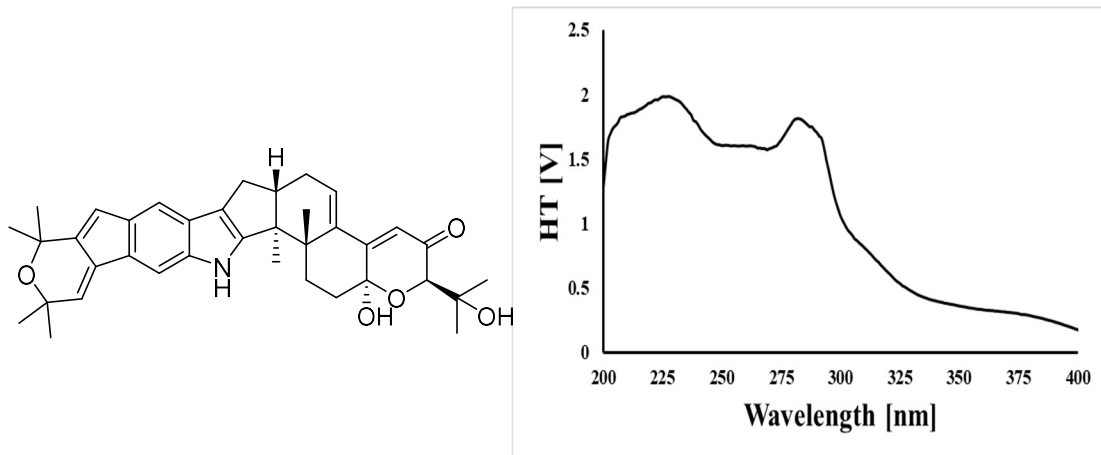

**Figure S10.** ECD Spectrum of Shearinine U (2) in MeOH

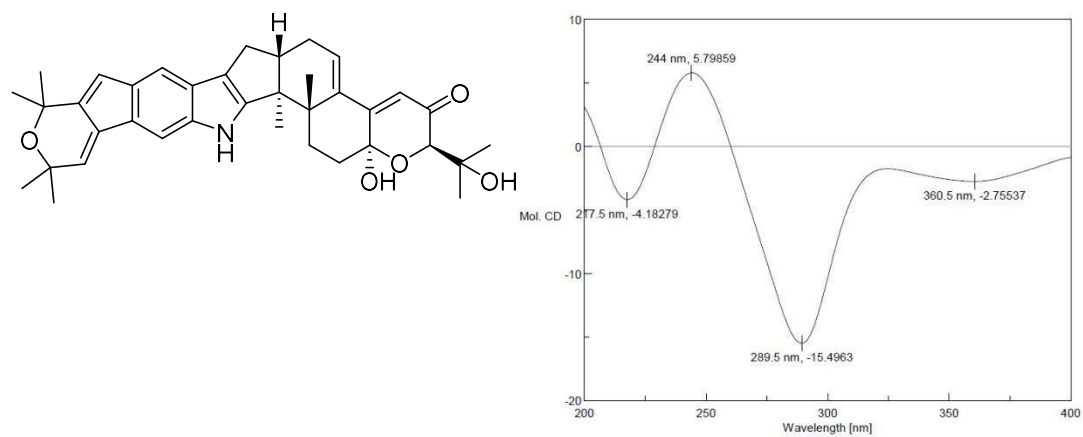

**Figure S11.** Relative Configurations and the Optimized Conformers for **2**

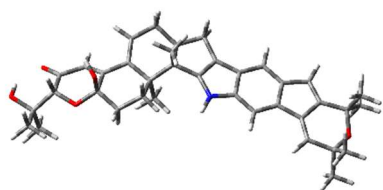

**2a**

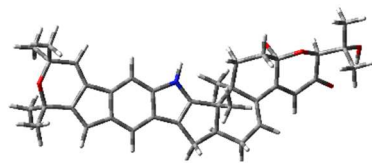

**2b**

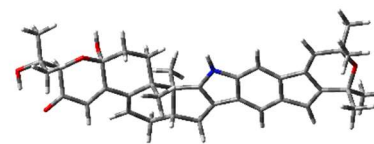

**2c**

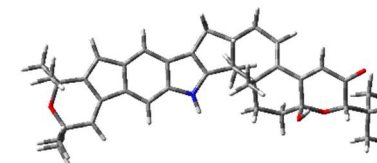

**2d**

Figure S12. <sup>1</sup>H NMR Spectrum of Shearinine V (**3**; 600 MHz, DMSO-*d*<sub>6</sub>)

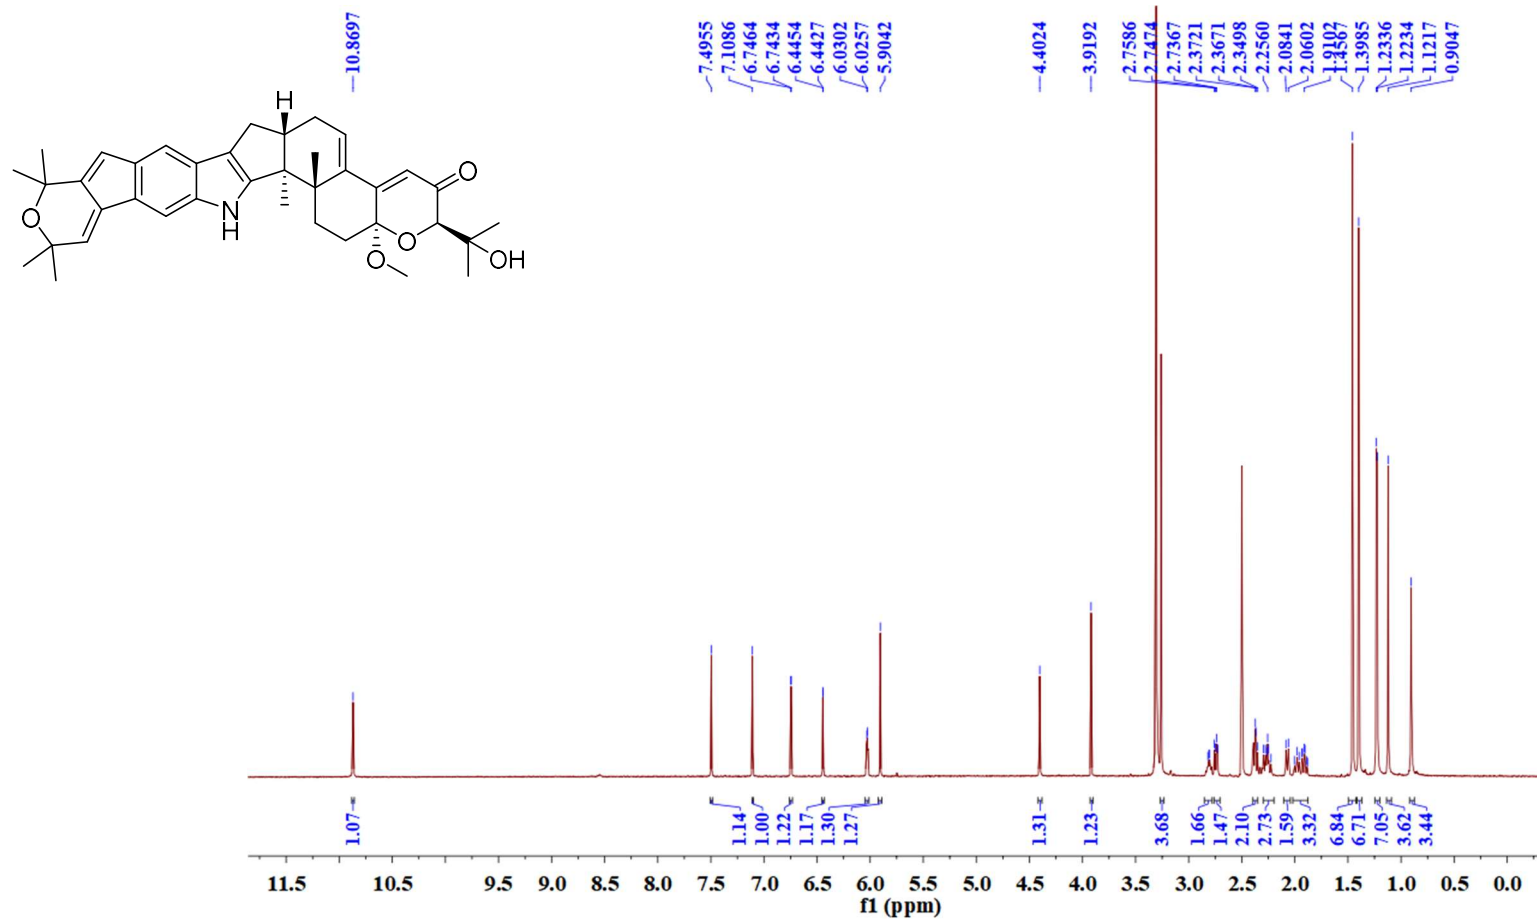

Figure S13.  $^{13}\text{C}$  NMR Spectrum of Shearinine V (3; 150 MHz, DMSO- $d_6$ )

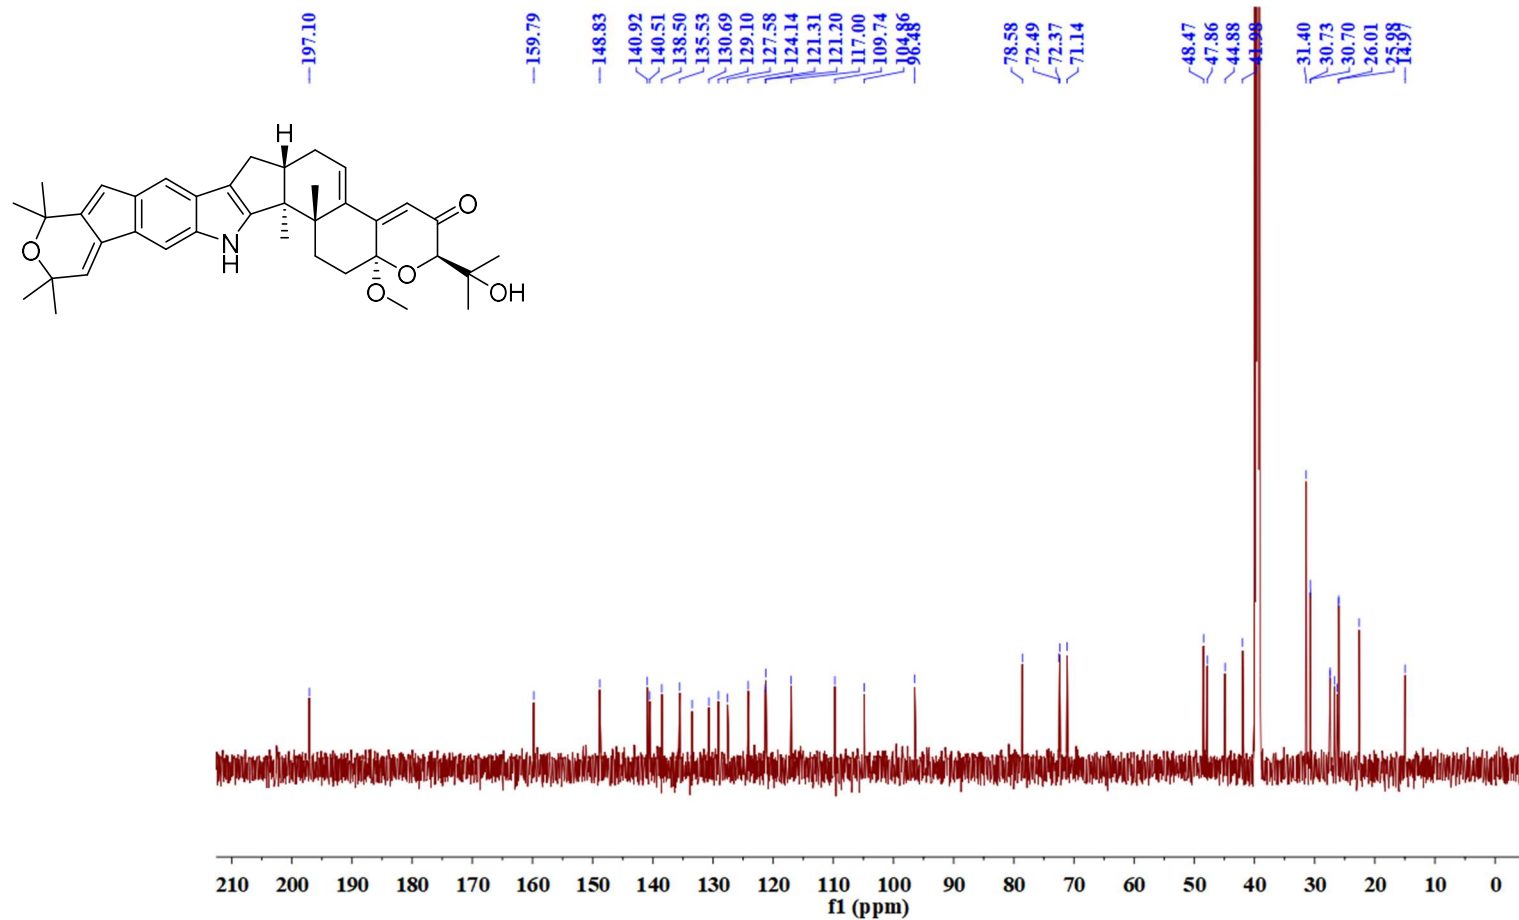



**Figure S14.** HSQC Spectrum of Shearinine V (**3**; 600 MHz, DMSO-*d*<sub>6</sub>)

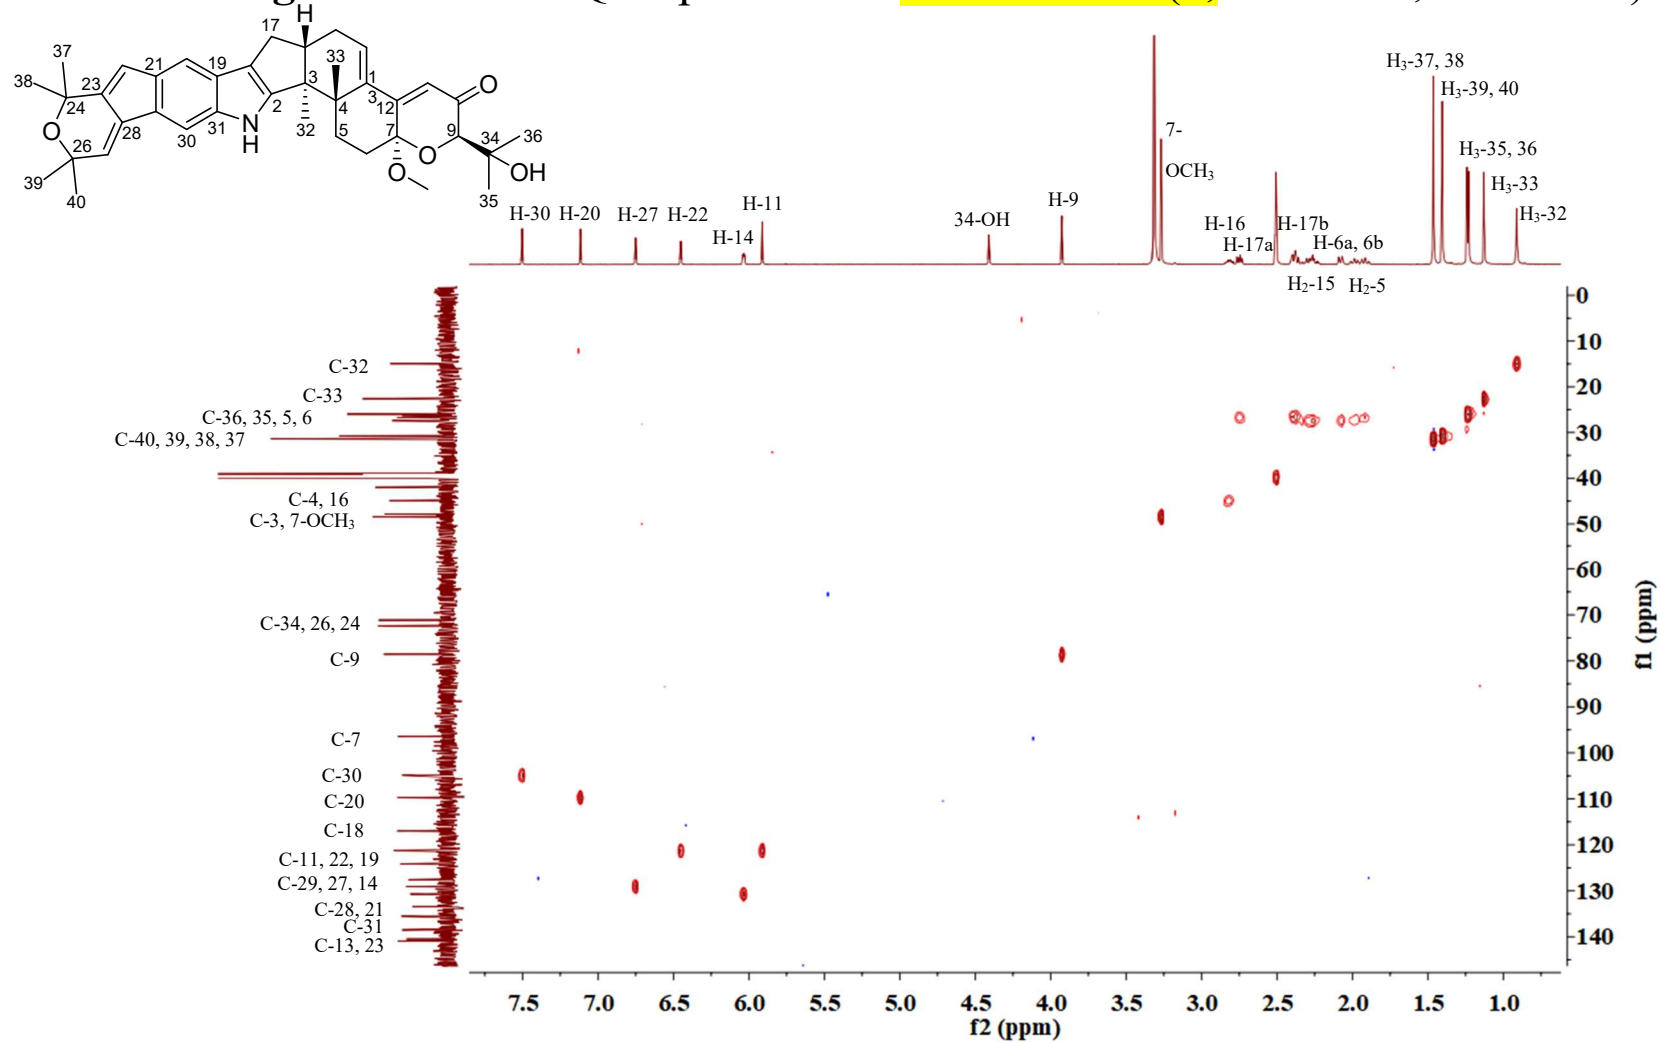

**Figure S15.**  $^1\text{H}$ - $^1\text{H}$  COSY Spectrum of Shearinine V (**3**; 600 MHz,  $\text{DMSO-}d_6$ )

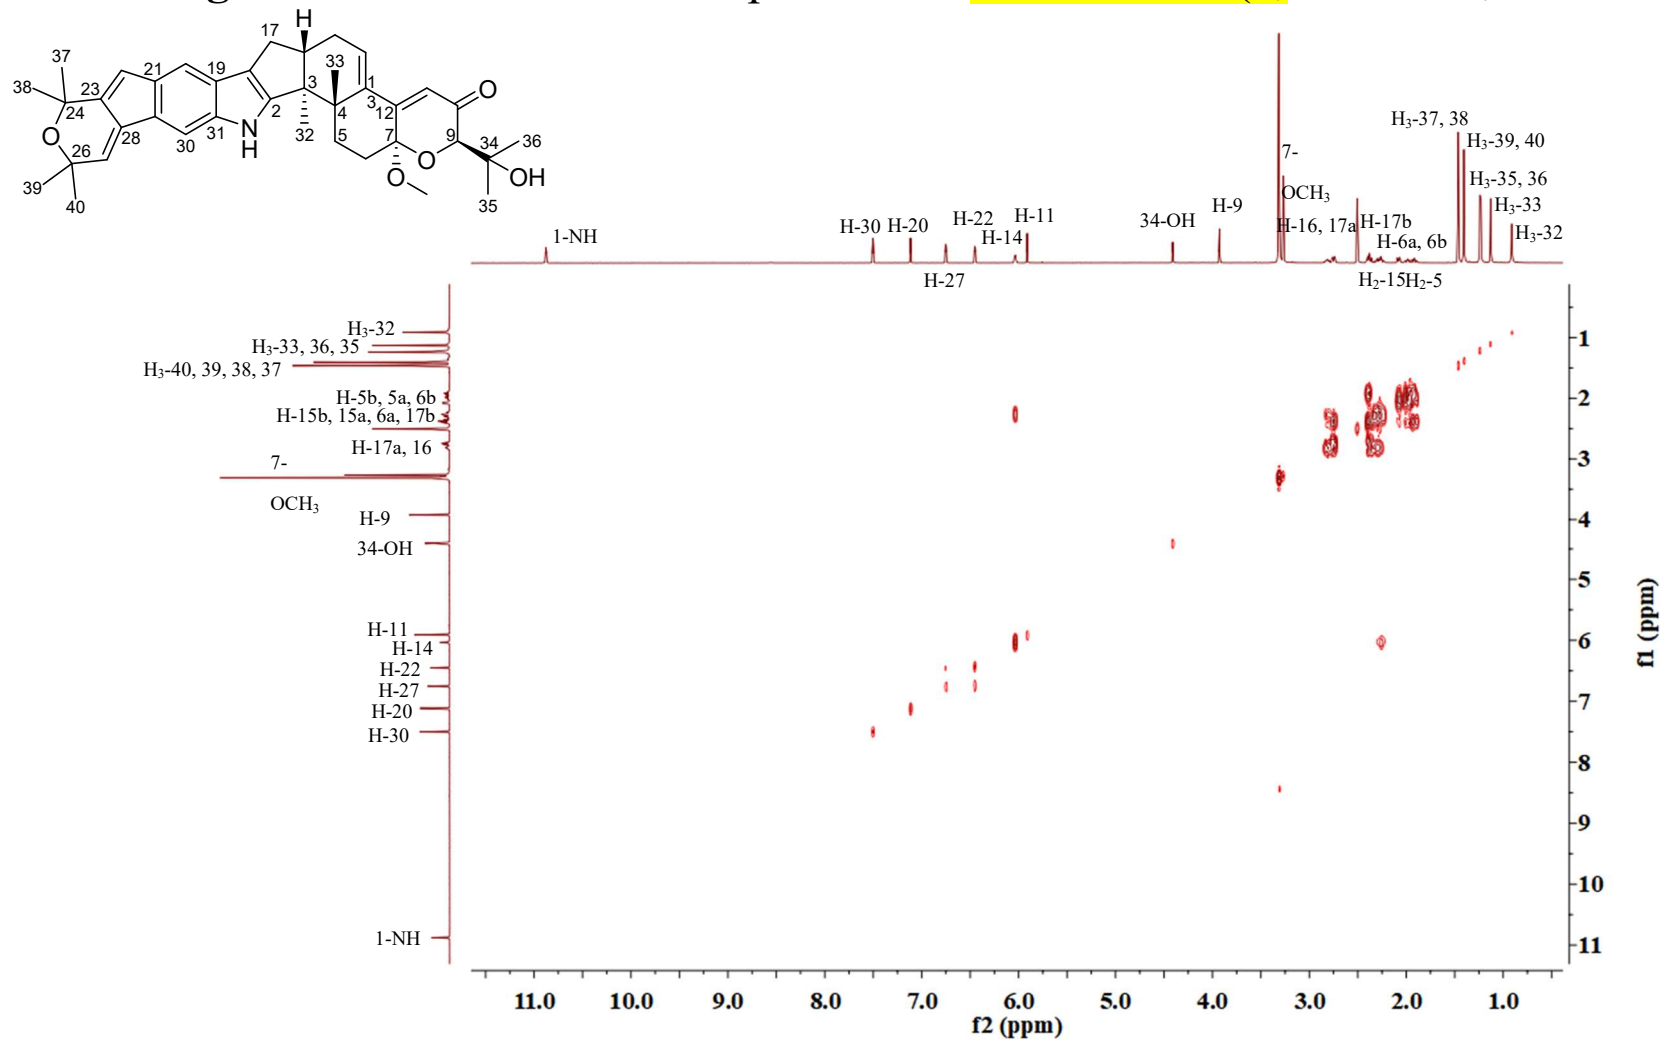

**Figure S16.** HMBC Spectrum of **Shearinine V (3)**; 600 MHz, DMSO-*d*<sub>6</sub>)

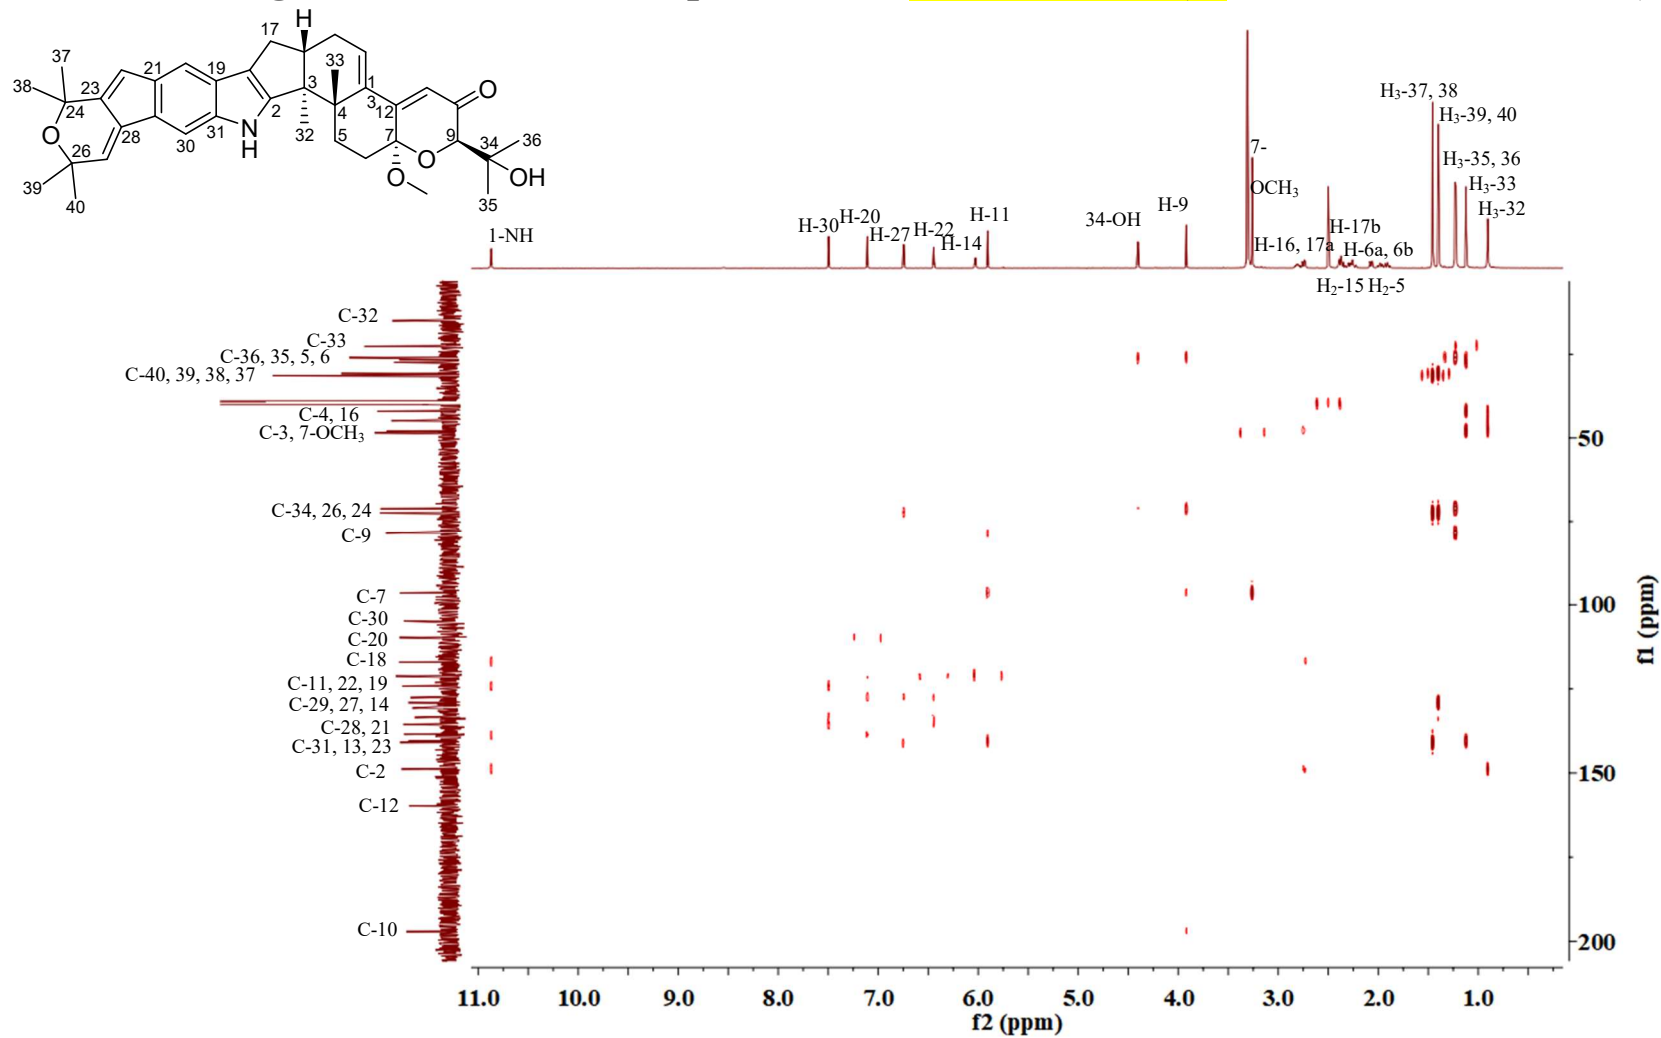

Figure S17. NOESY Spectrum of Shearinine V (**3**; 600 MHz, DMSO-*d*<sub>6</sub>)

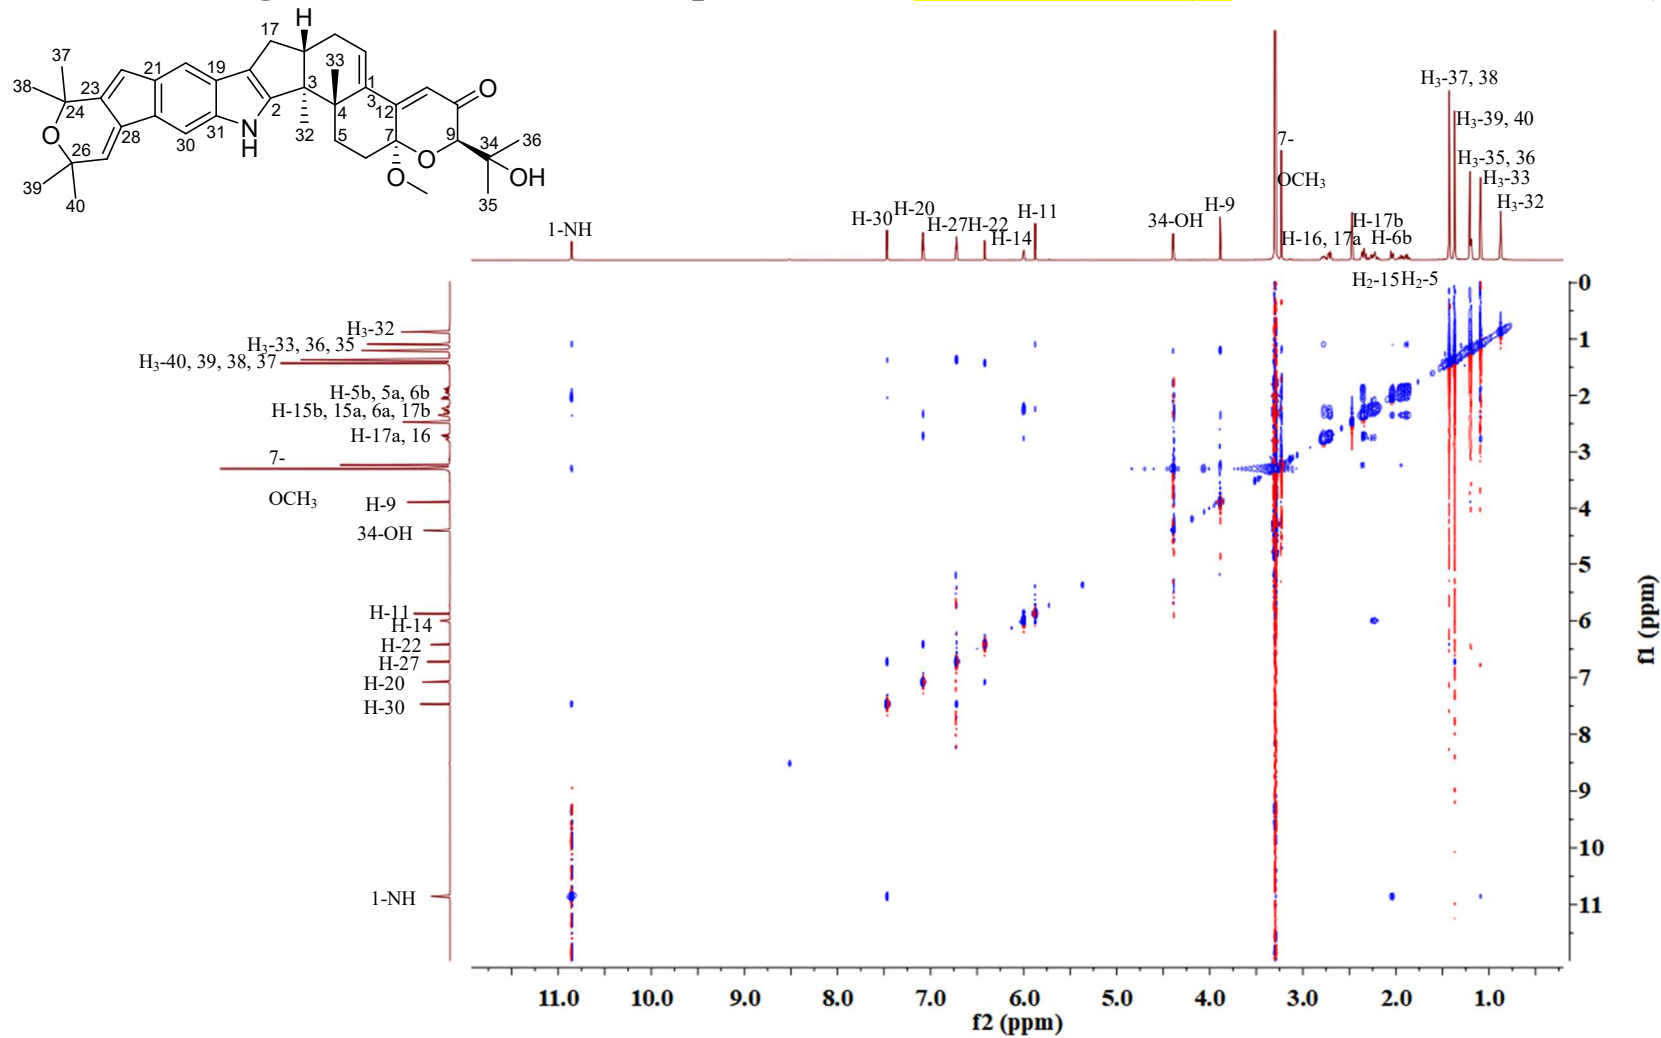

Figure S18. HRESIMS Spectrum of Shearinine V (3)

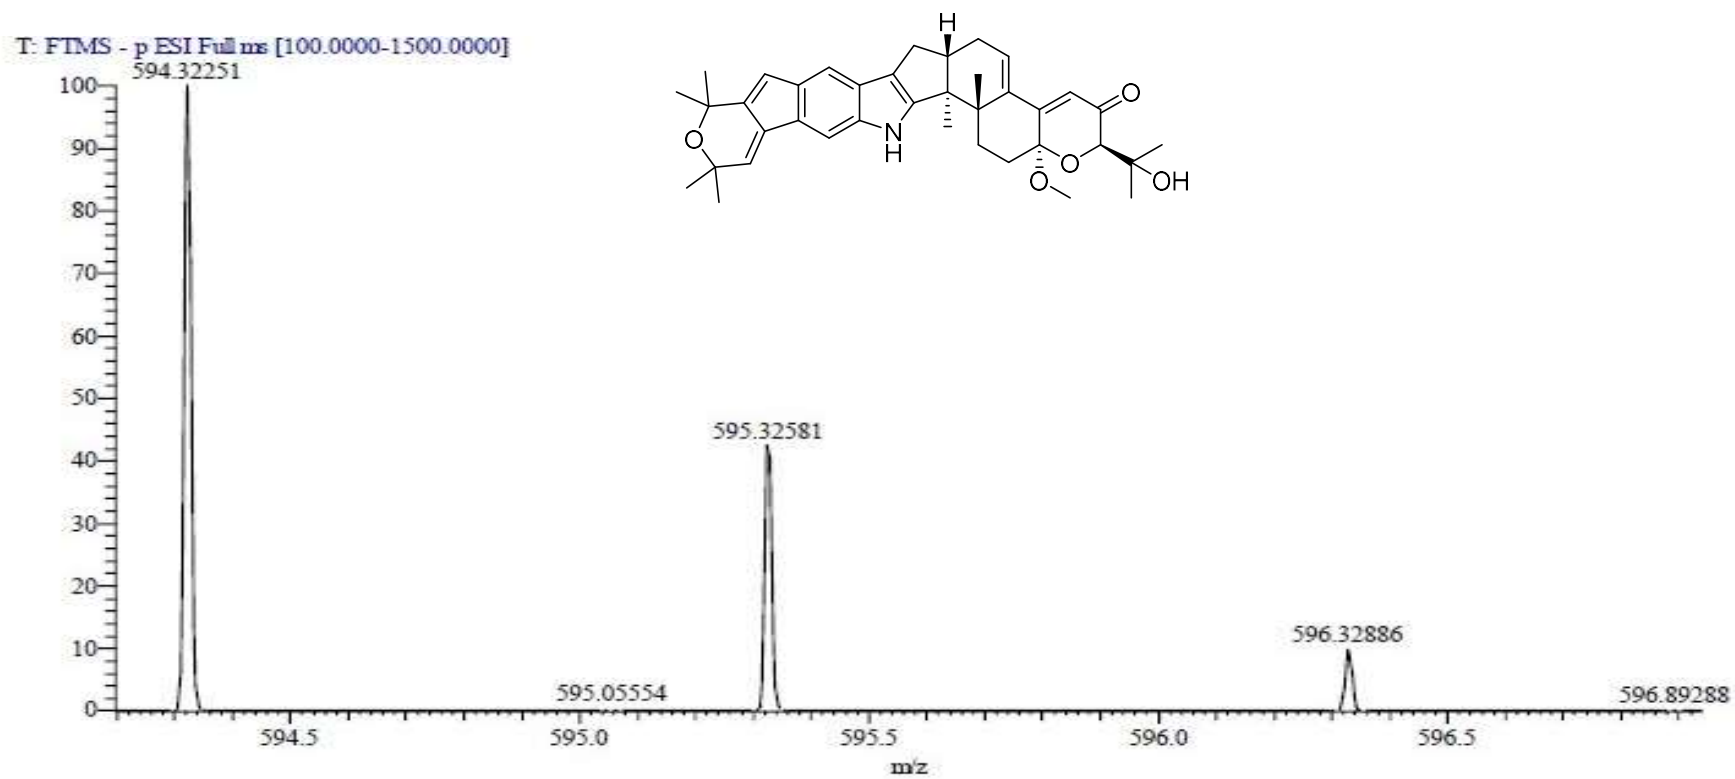

Figure S19. IR Spectrum of Shearinine V (3)

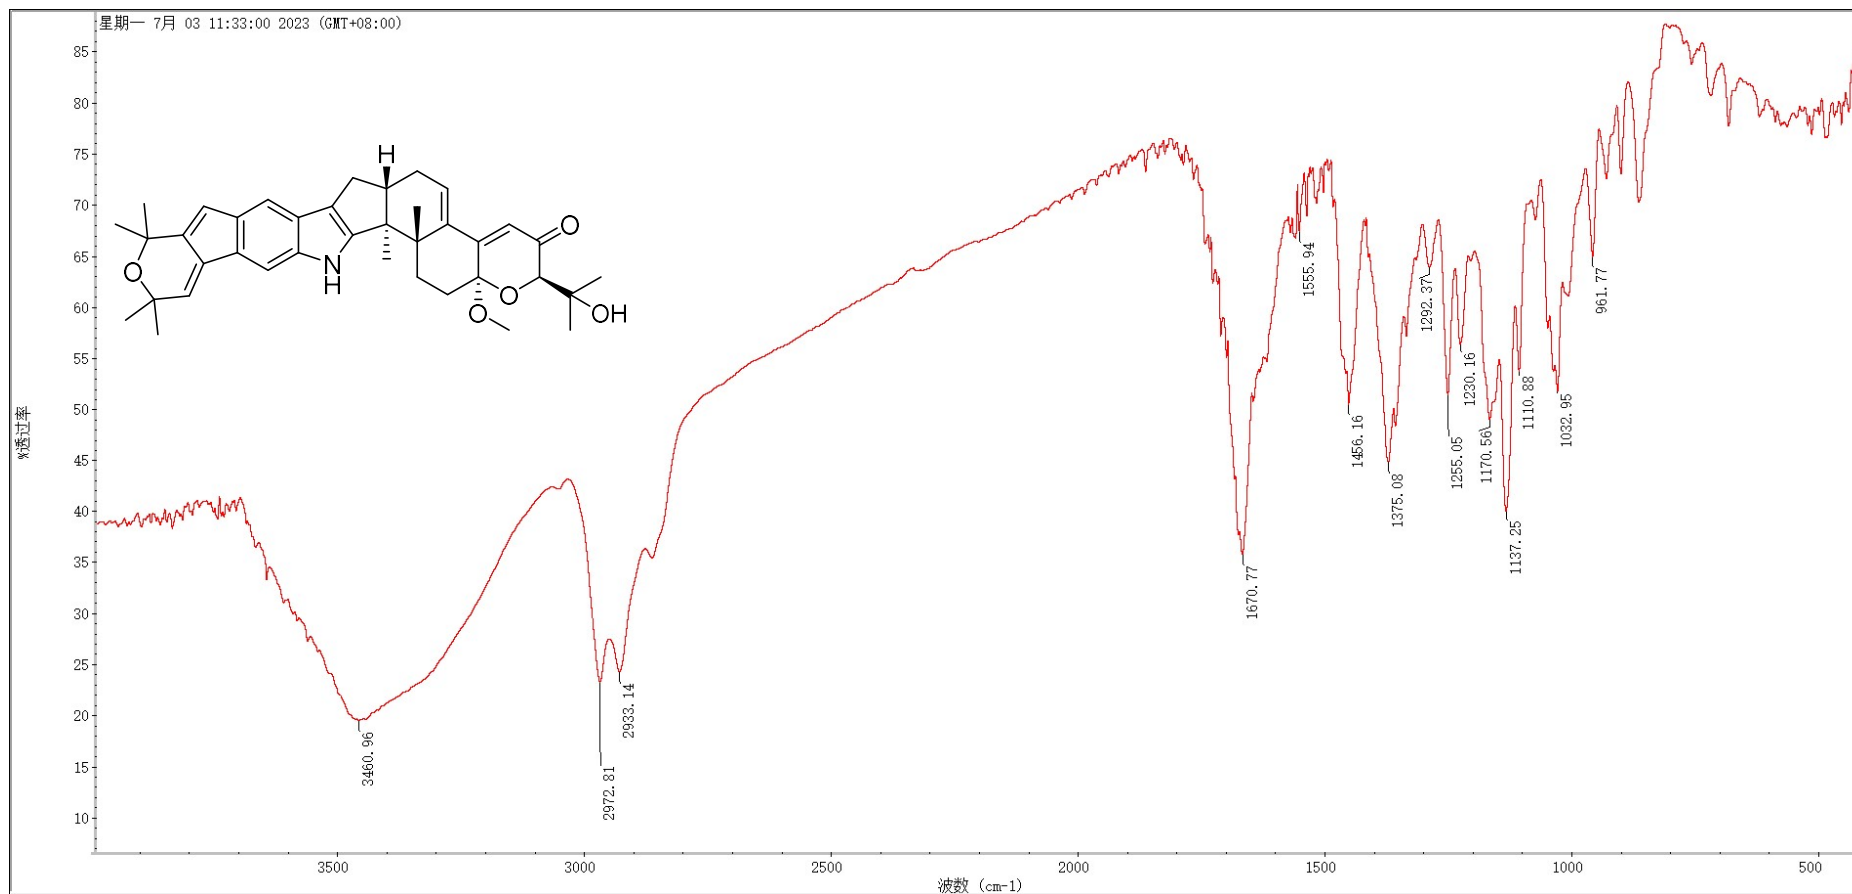

**Figure S20.** UV Spectrum of Shearinine V (3) in MeOH

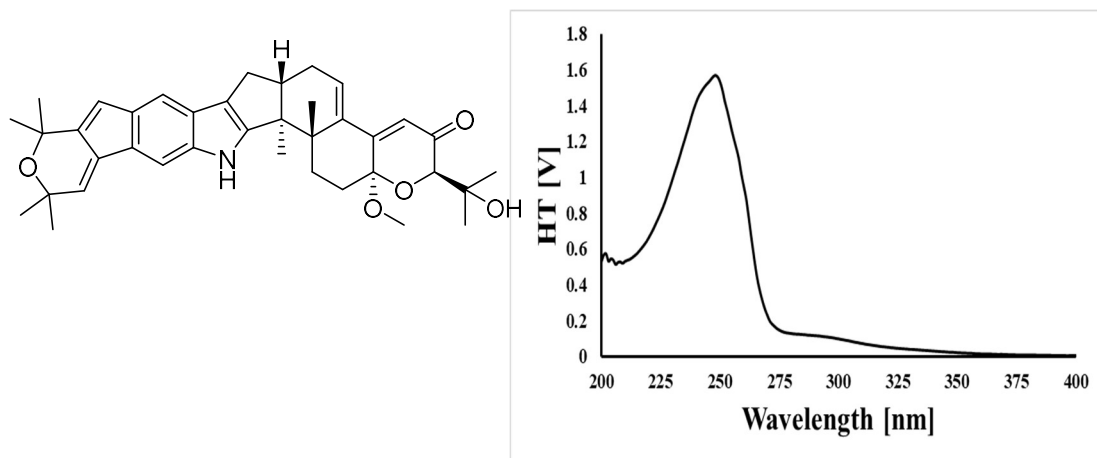

**Figure S21.** ECD Spectrum of Shearinine V (3) in MeOH

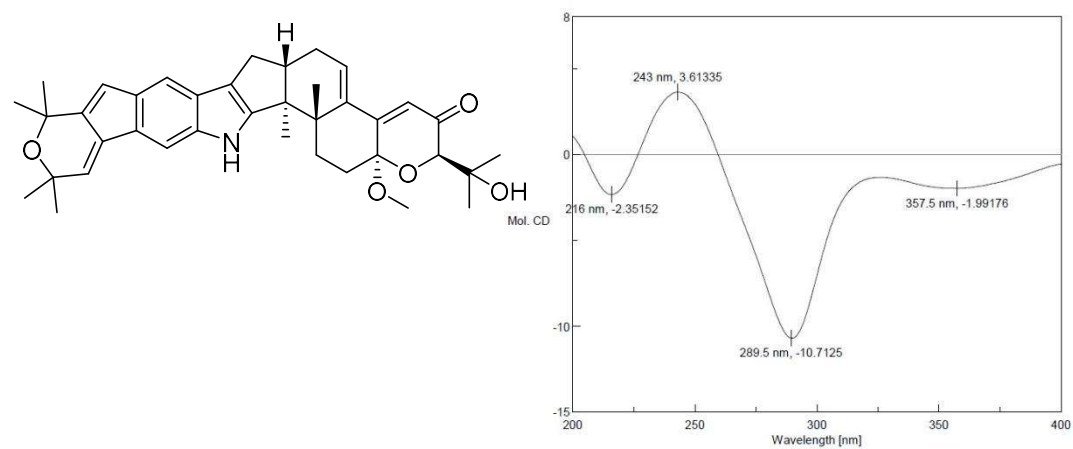

Figure S22. <sup>1</sup>H NMR Spectrum of Shearinine W (4; 600 MHz, DMSO-*d*<sub>6</sub>)

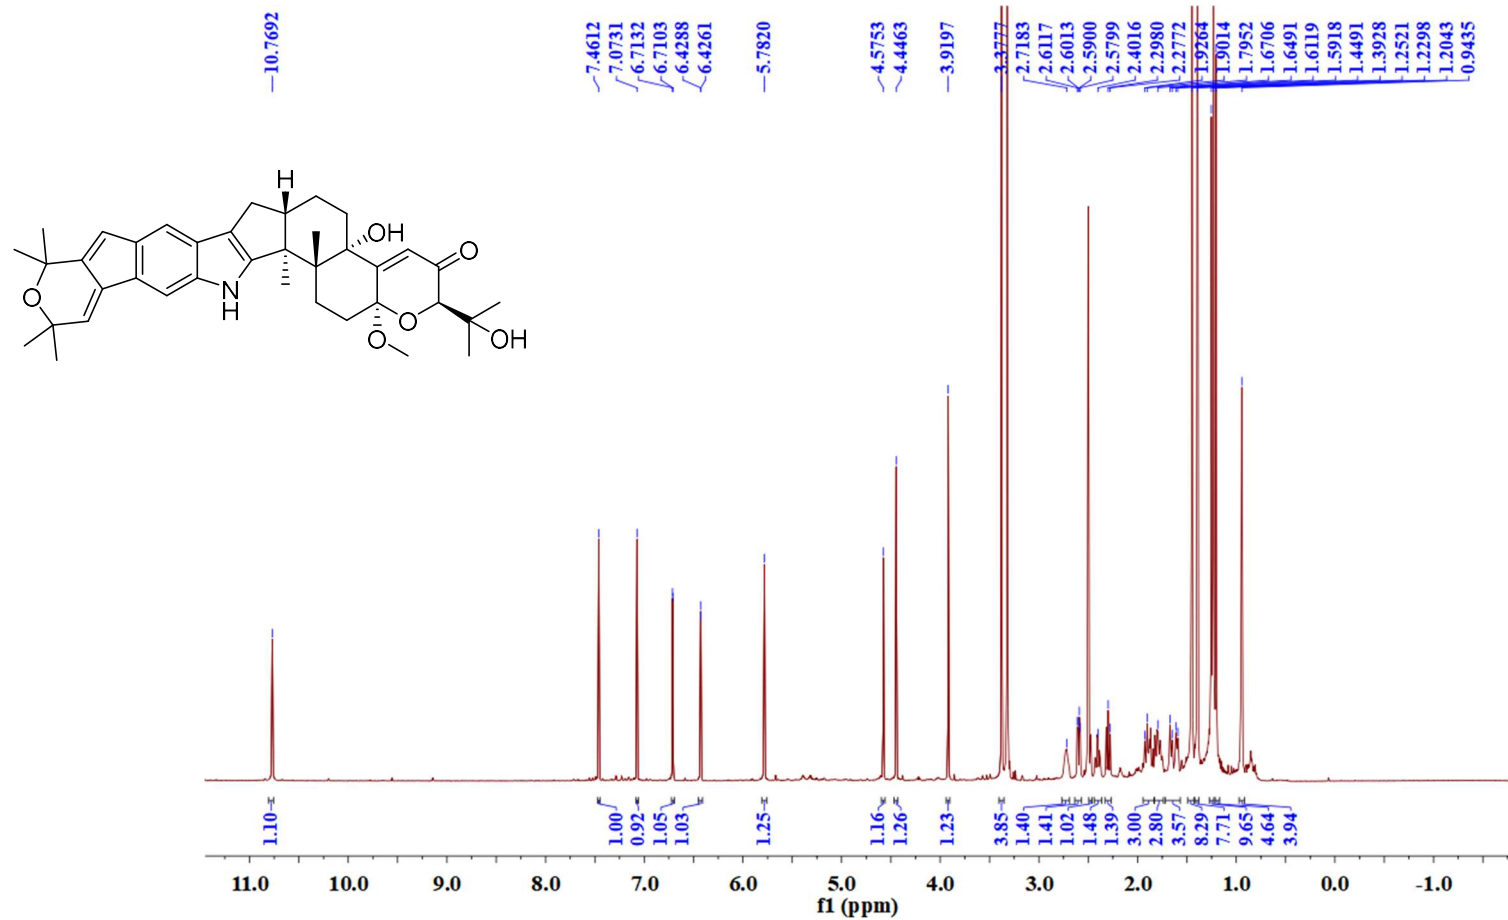



Figure S23. <sup>13</sup>C NMR Spectrum of Shearinine W (4; 150 MHz, DMSO-*d*<sub>6</sub>)

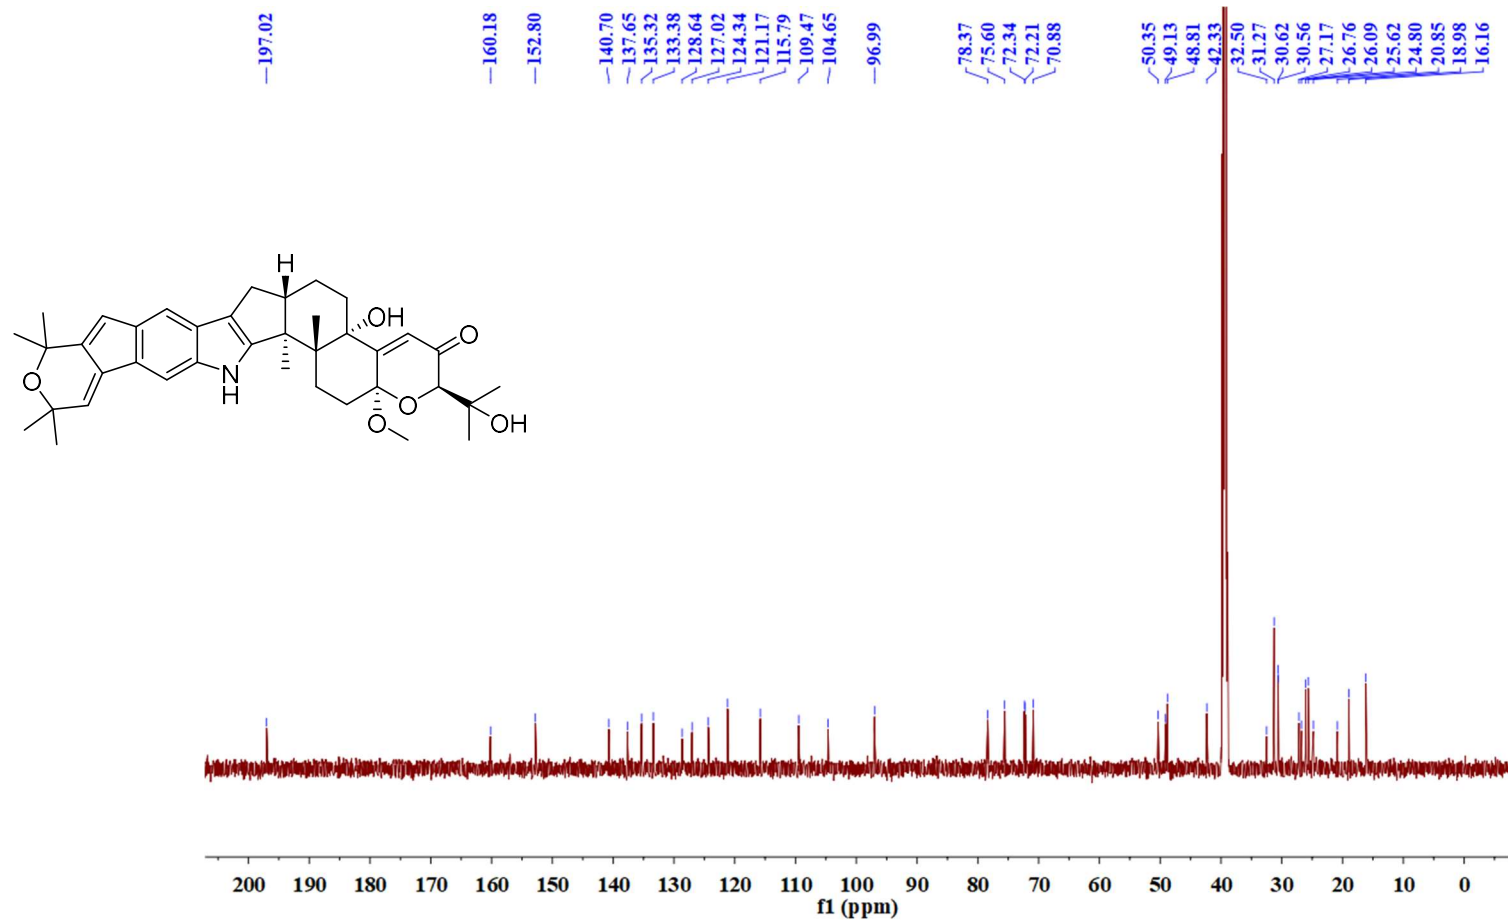

**Figure S24.** HSQC Spectrum of Shearinine W (4; 600 MHz, DMSO-*d*<sub>6</sub>)

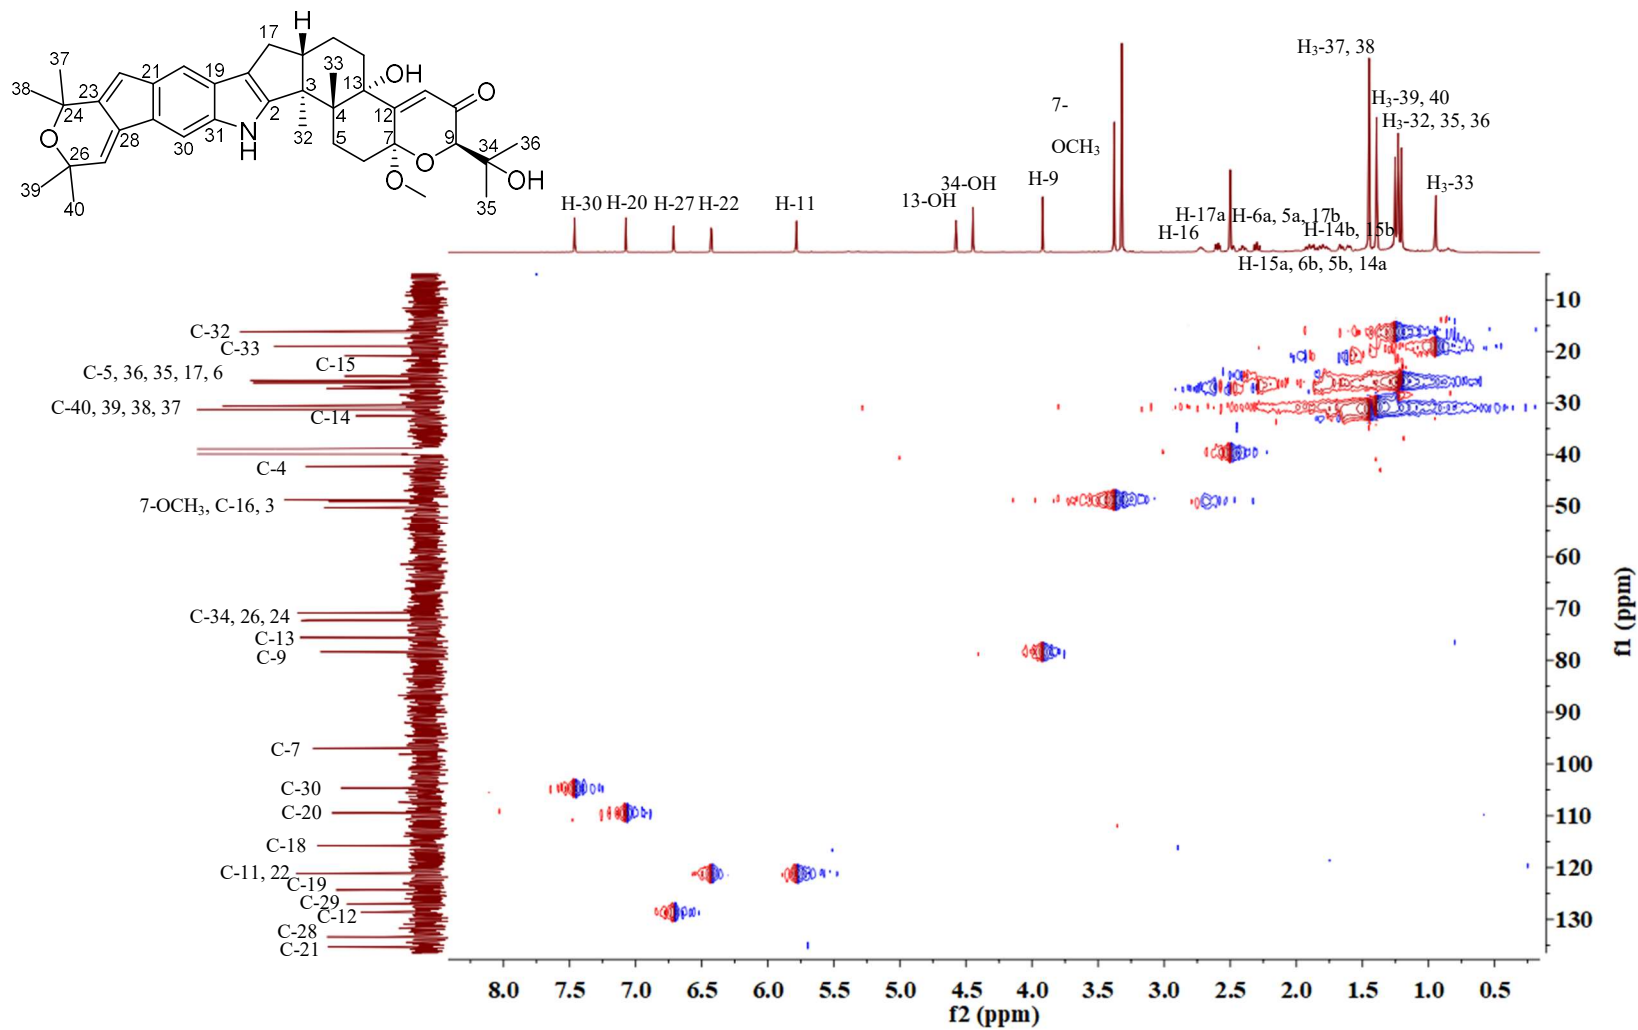

**Figure S25.**  $^1\text{H}$ - $^1\text{H}$  COSY Spectrum of Shearinine W (**4**; 600 MHz,  $\text{DMSO-}d_6$ )

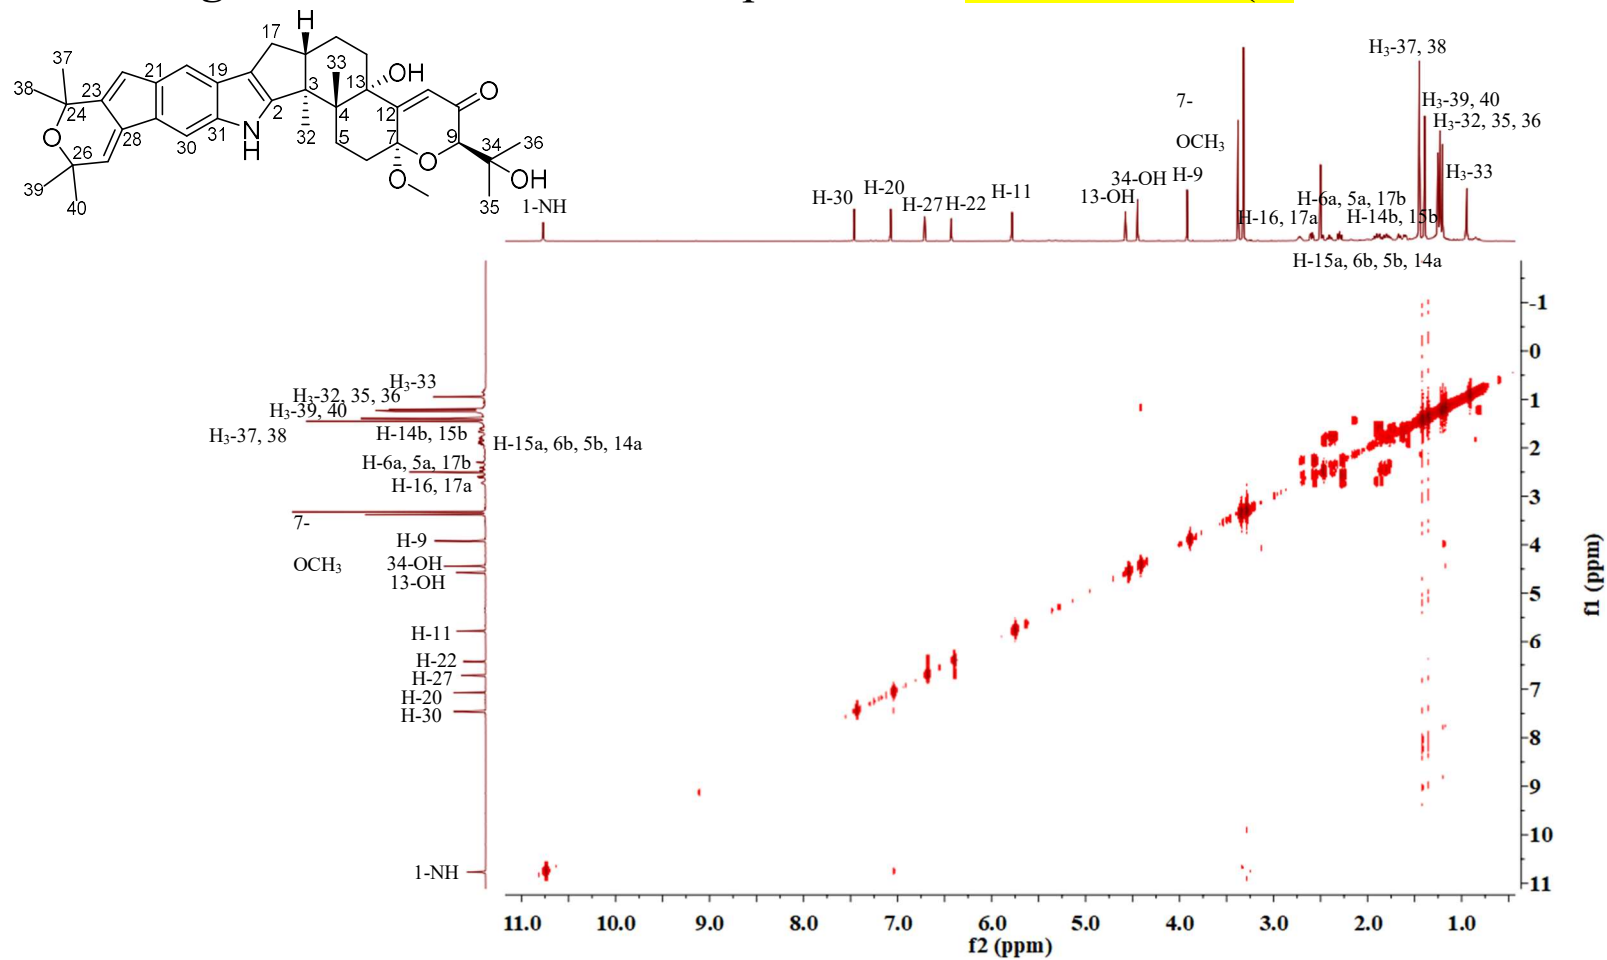

**Figure S26.** HMBC Spectrum of Shearinine W (**4**; 600 MHz, DMSO-*d*<sub>6</sub>)

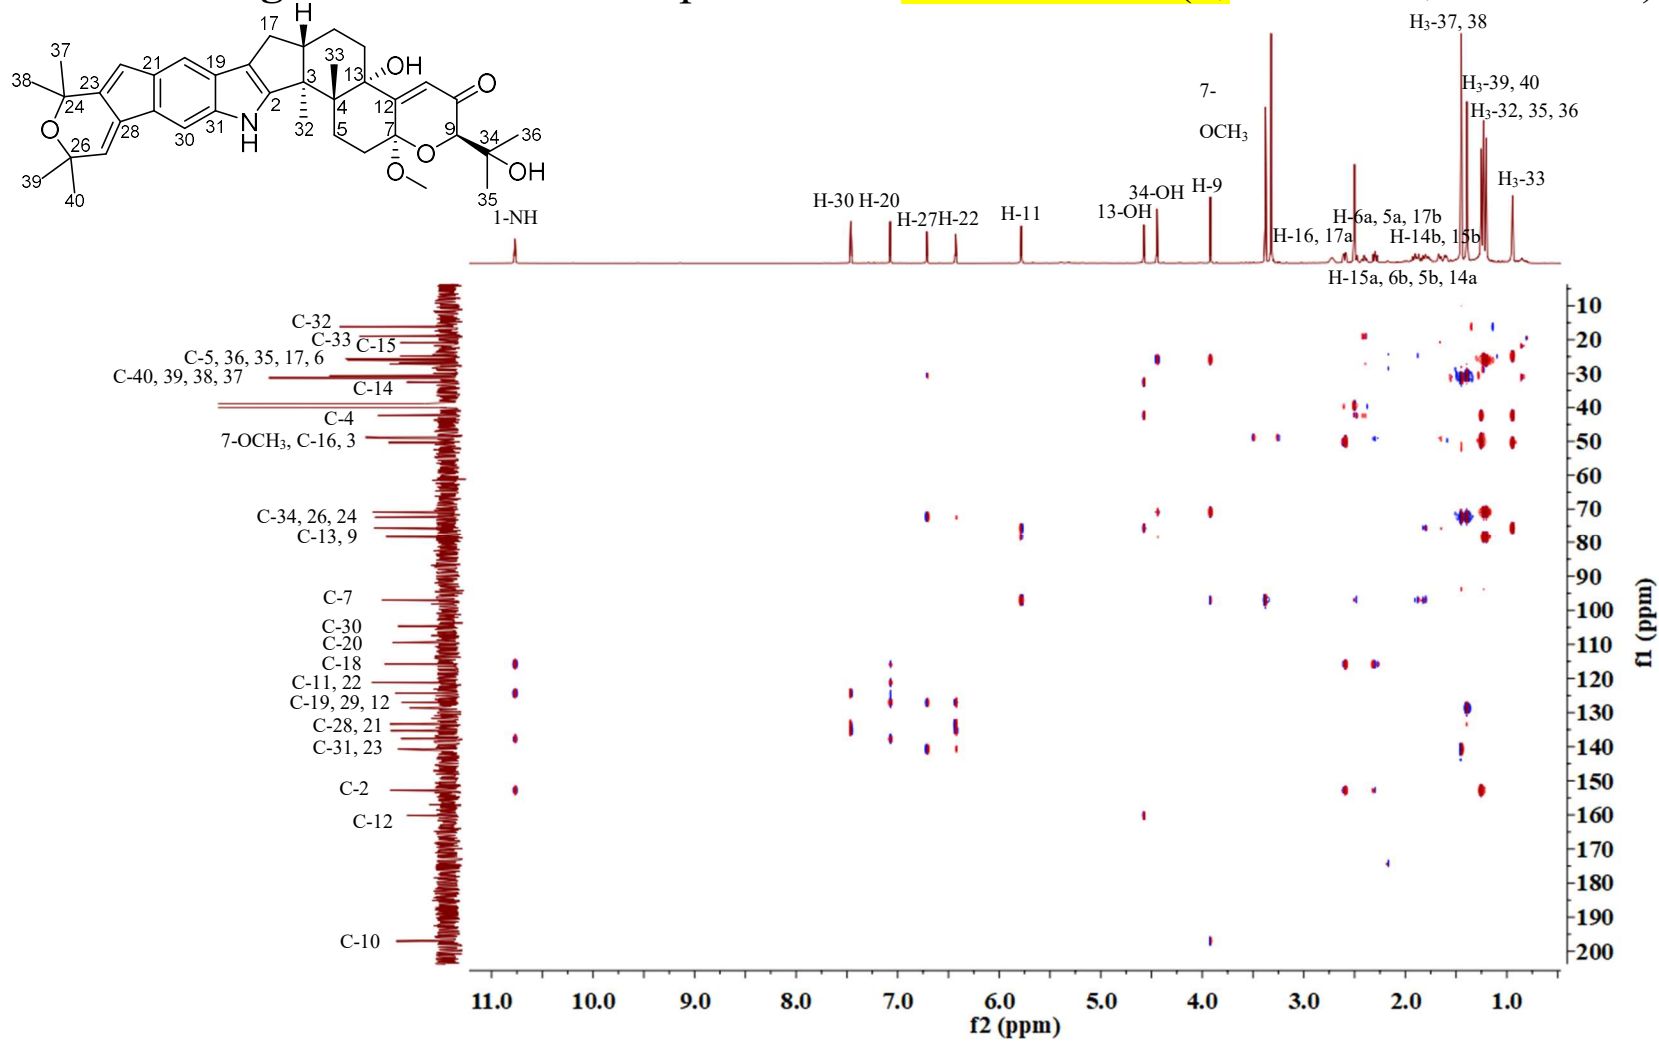

**Figure S27.** NOESY Spectrum of Shearinine W (4; 600 MHz, DMSO-*d*<sub>6</sub>)

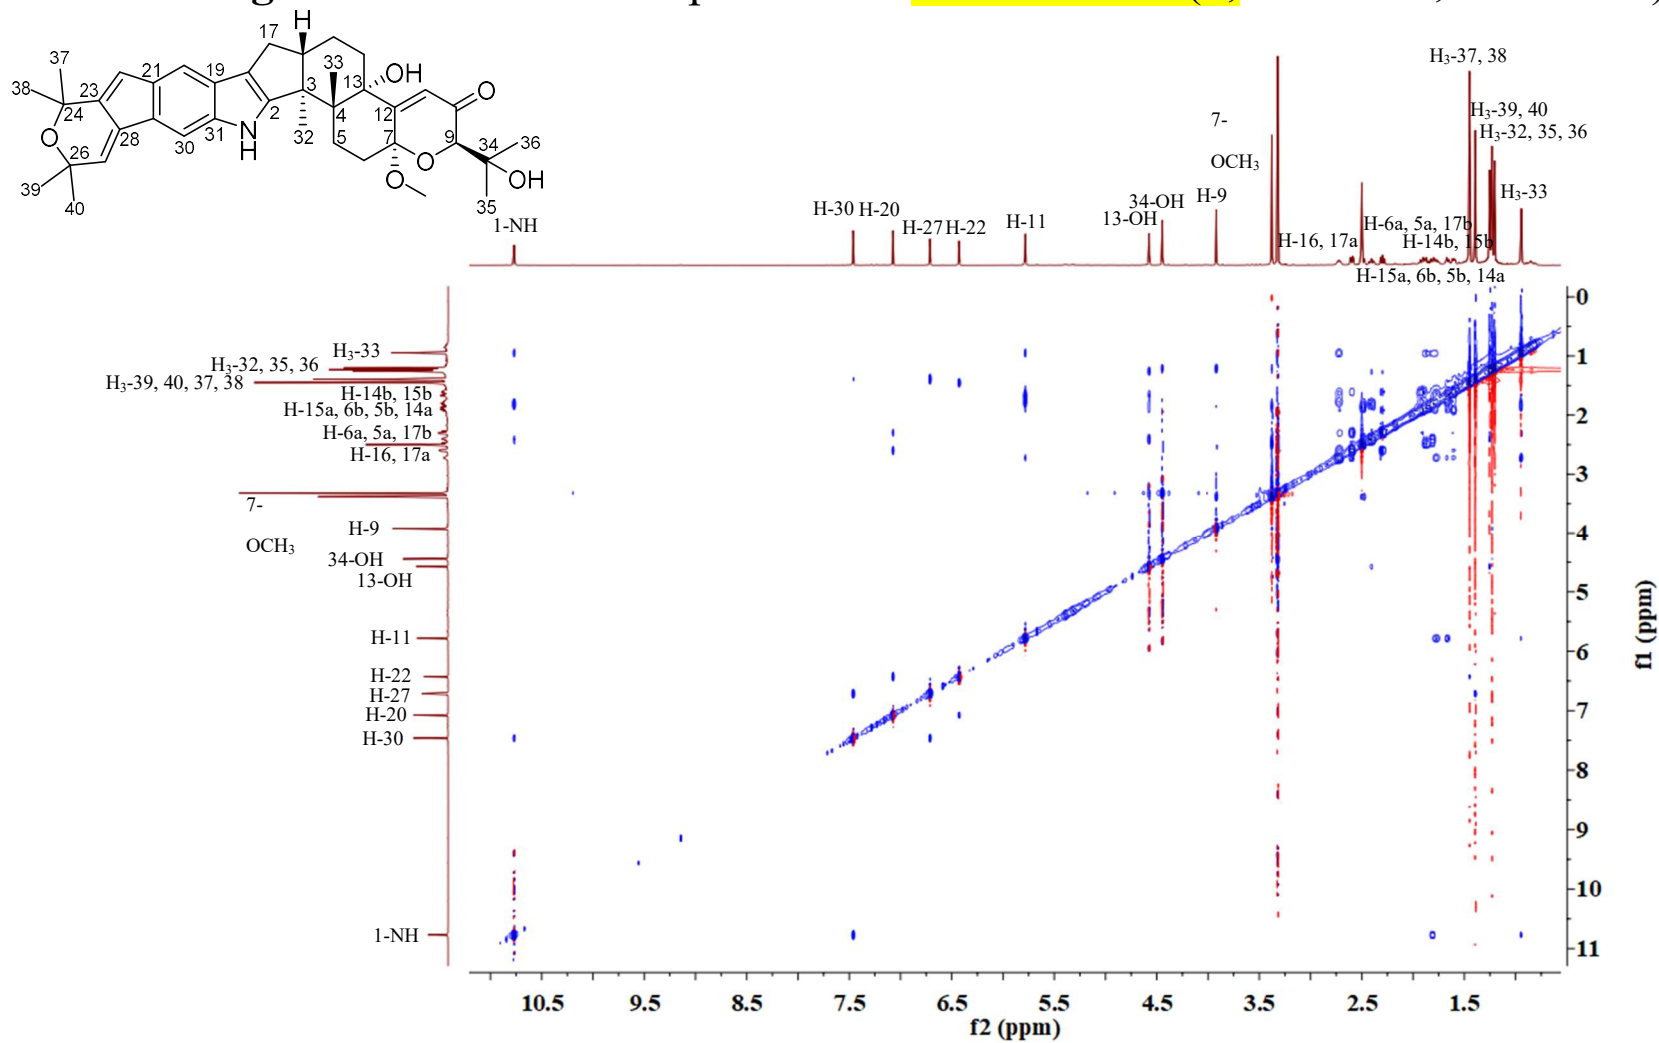

**Figure S28.** HRESIMS Spectrum of Shearinine W (4)

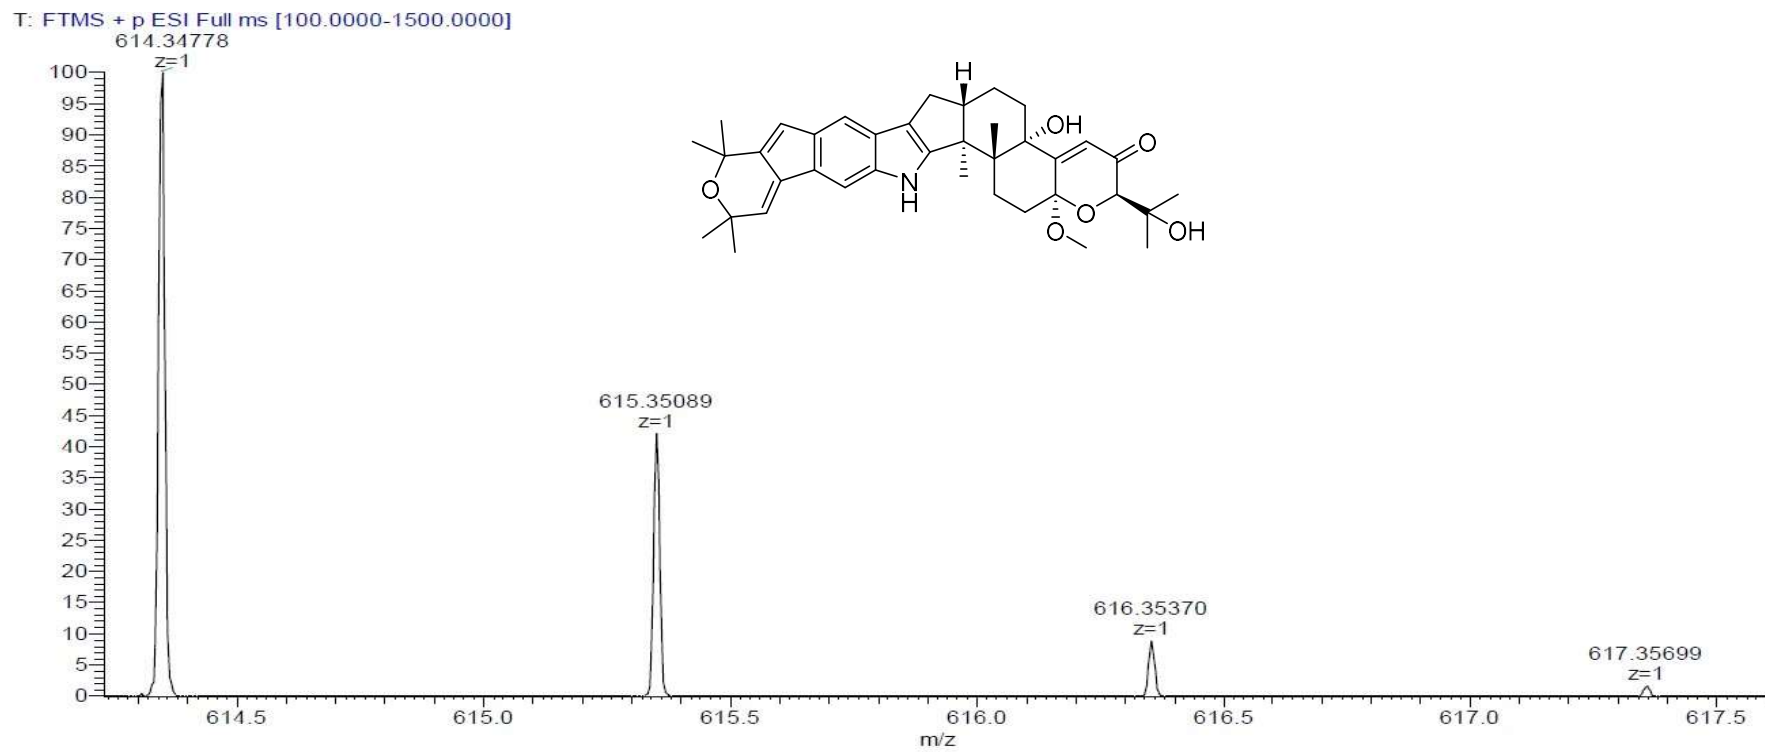

Figure S29. IR Spectrum of Shearinine W (4)

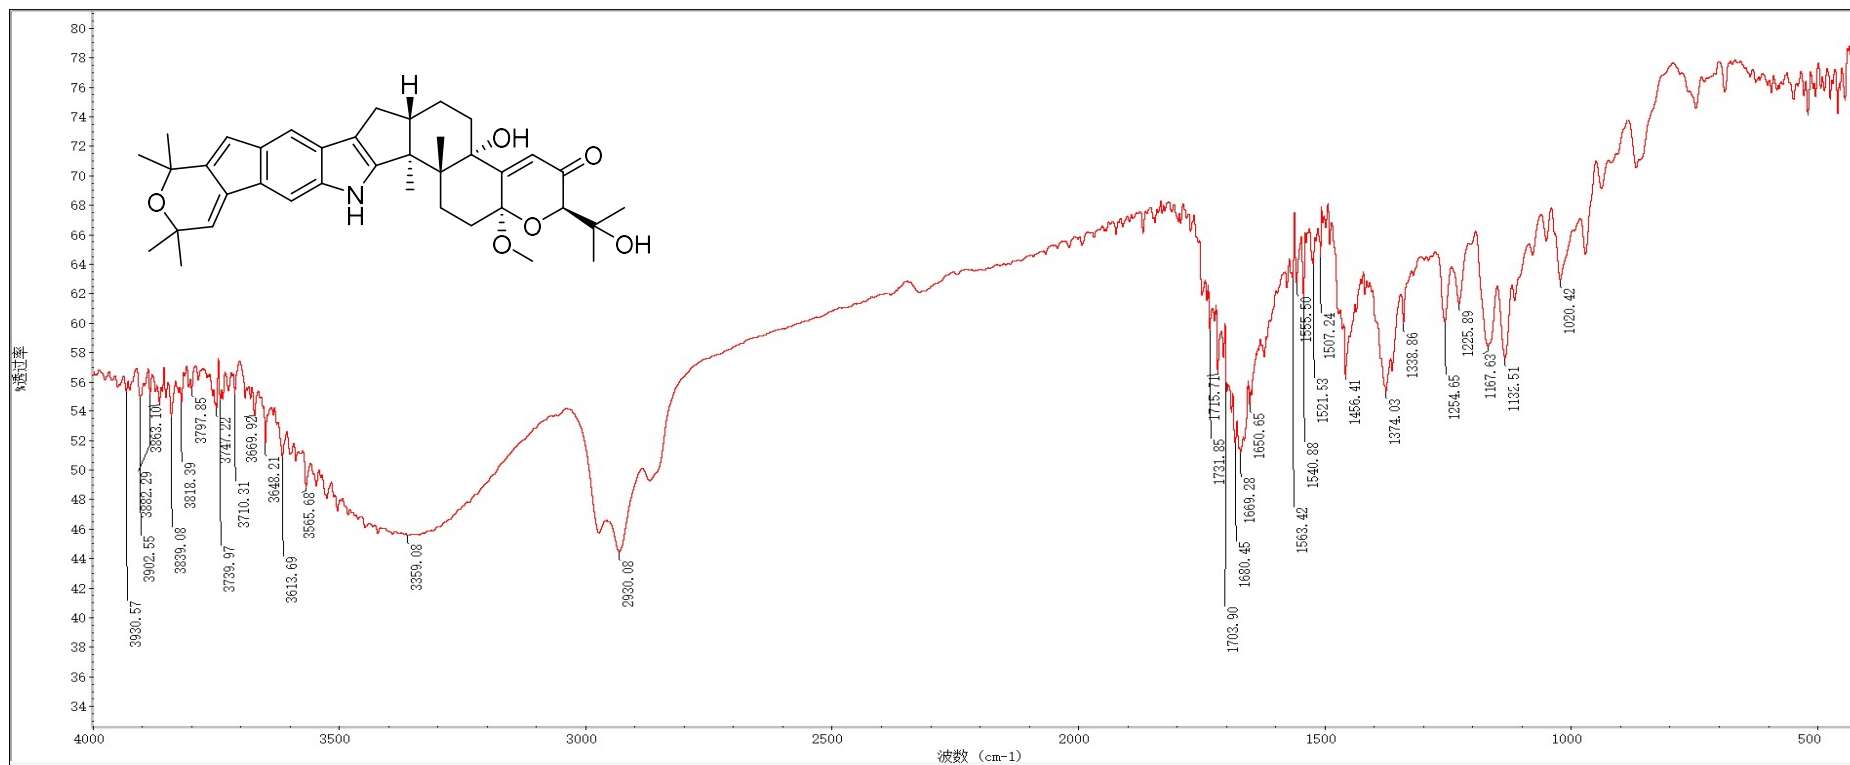

**Figure S30.** UV Spectrum of Shearinine W (4) in MeOH

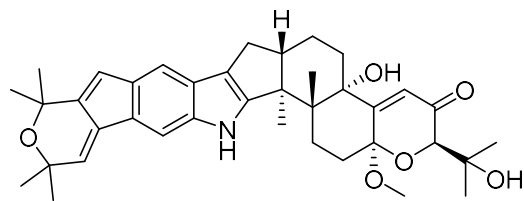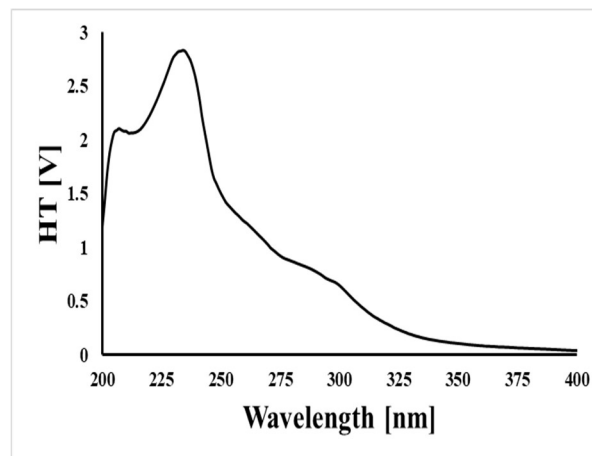

**Figure S31.** ECD Spectrum of Shearinine W (4) in MeOH

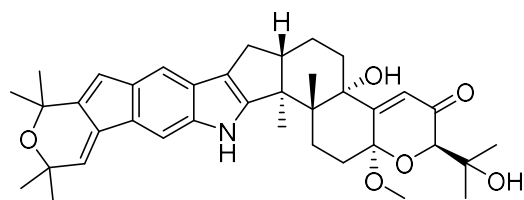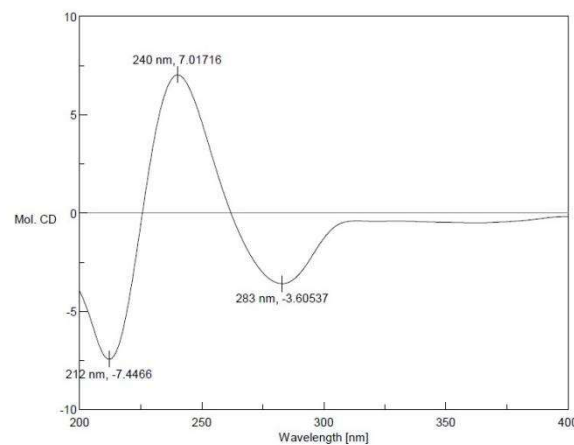



**Figure S32.** Relative Configurations and the Optimized Conformers for **4**

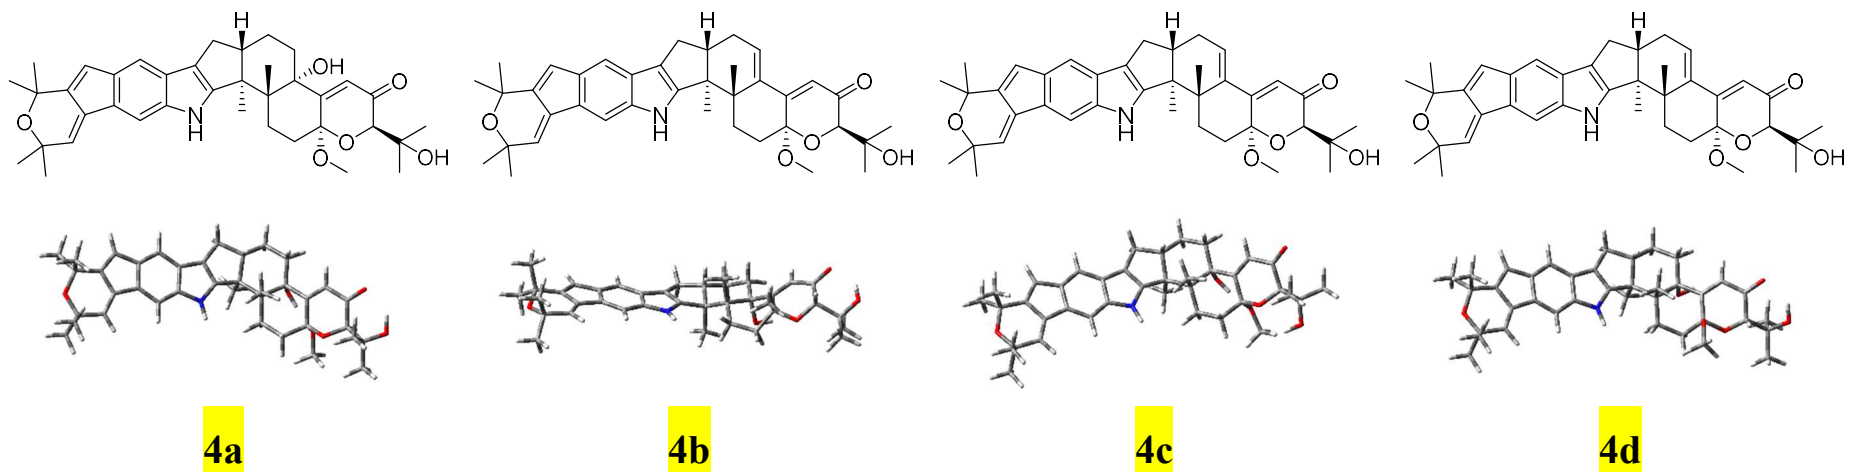

Figure S33.  $^1\text{H}$  NMR Spectrum of Shearinine X (5; 600 MHz,  $\text{DMSO-}d_6$ )

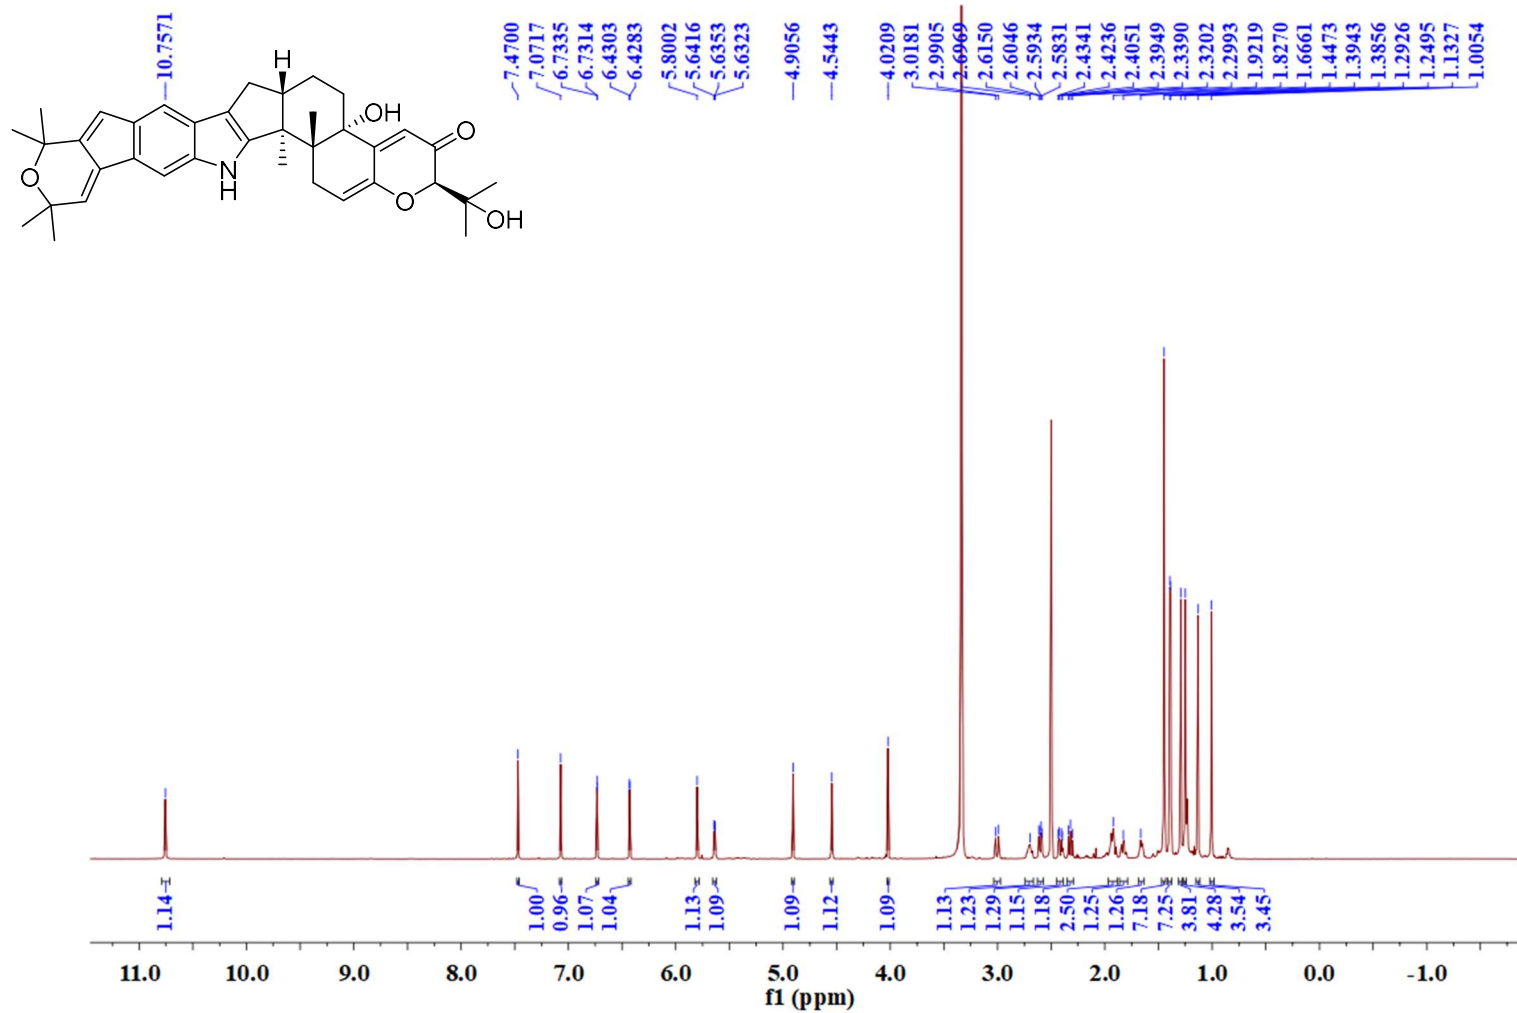

Figure S34. <sup>13</sup>C NMR Spectrum of Shearinine X (5; 150 MHz, DMSO-*d*<sub>6</sub>)

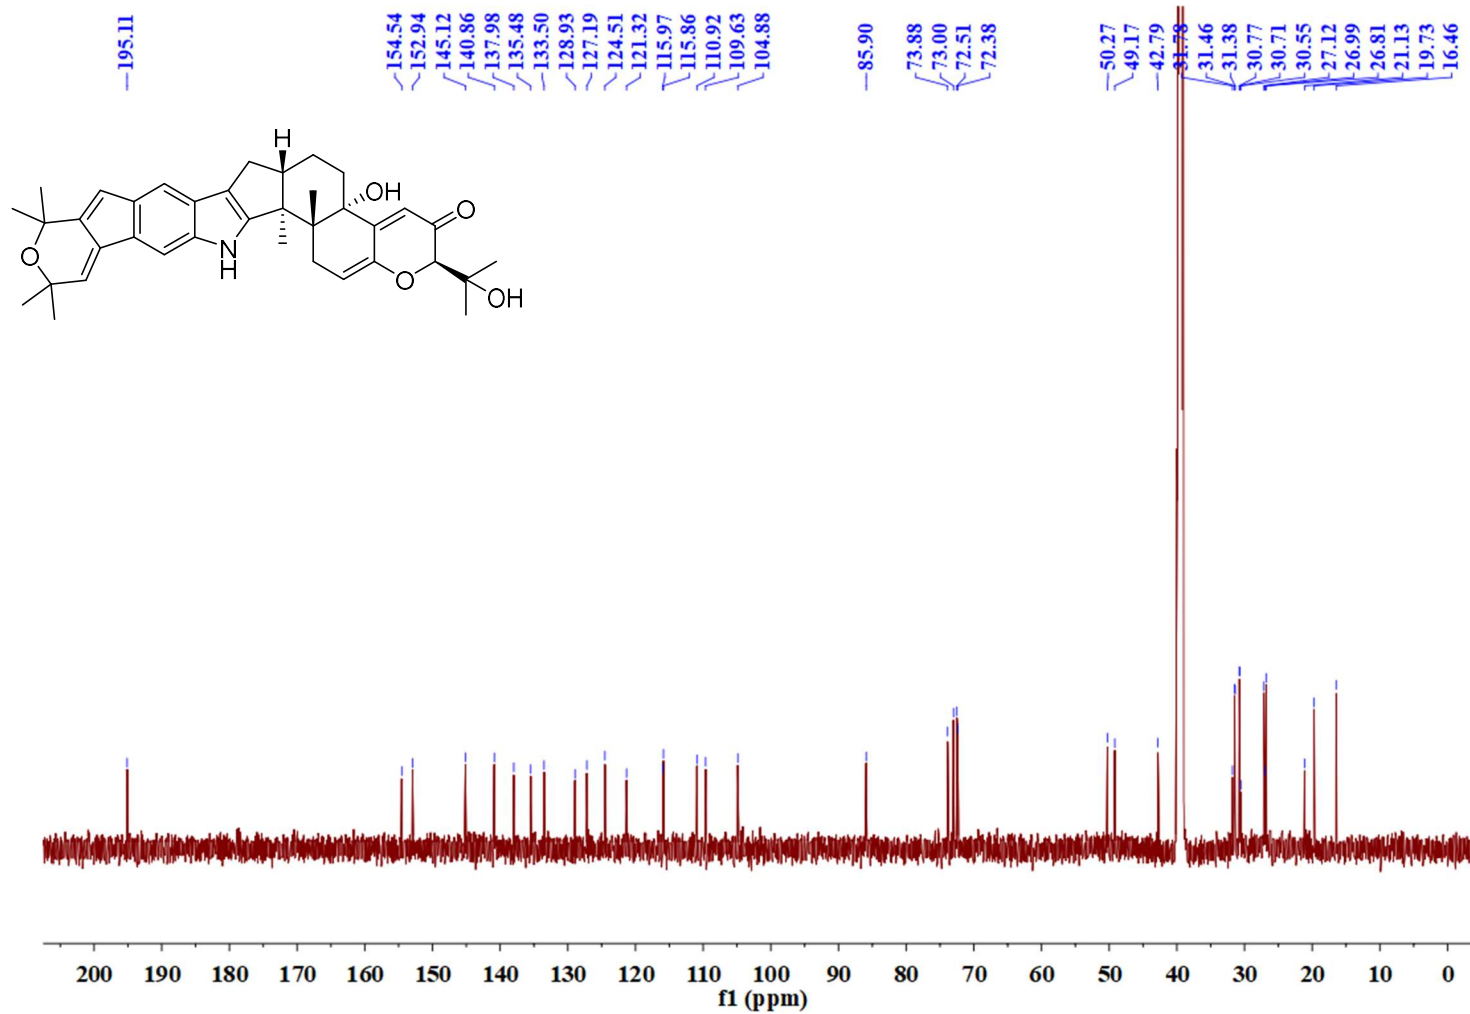

**Figure S35.** HSQC Spectrum of Shearinine X (5; 600 MHz, DMSO-*d*<sub>6</sub>)

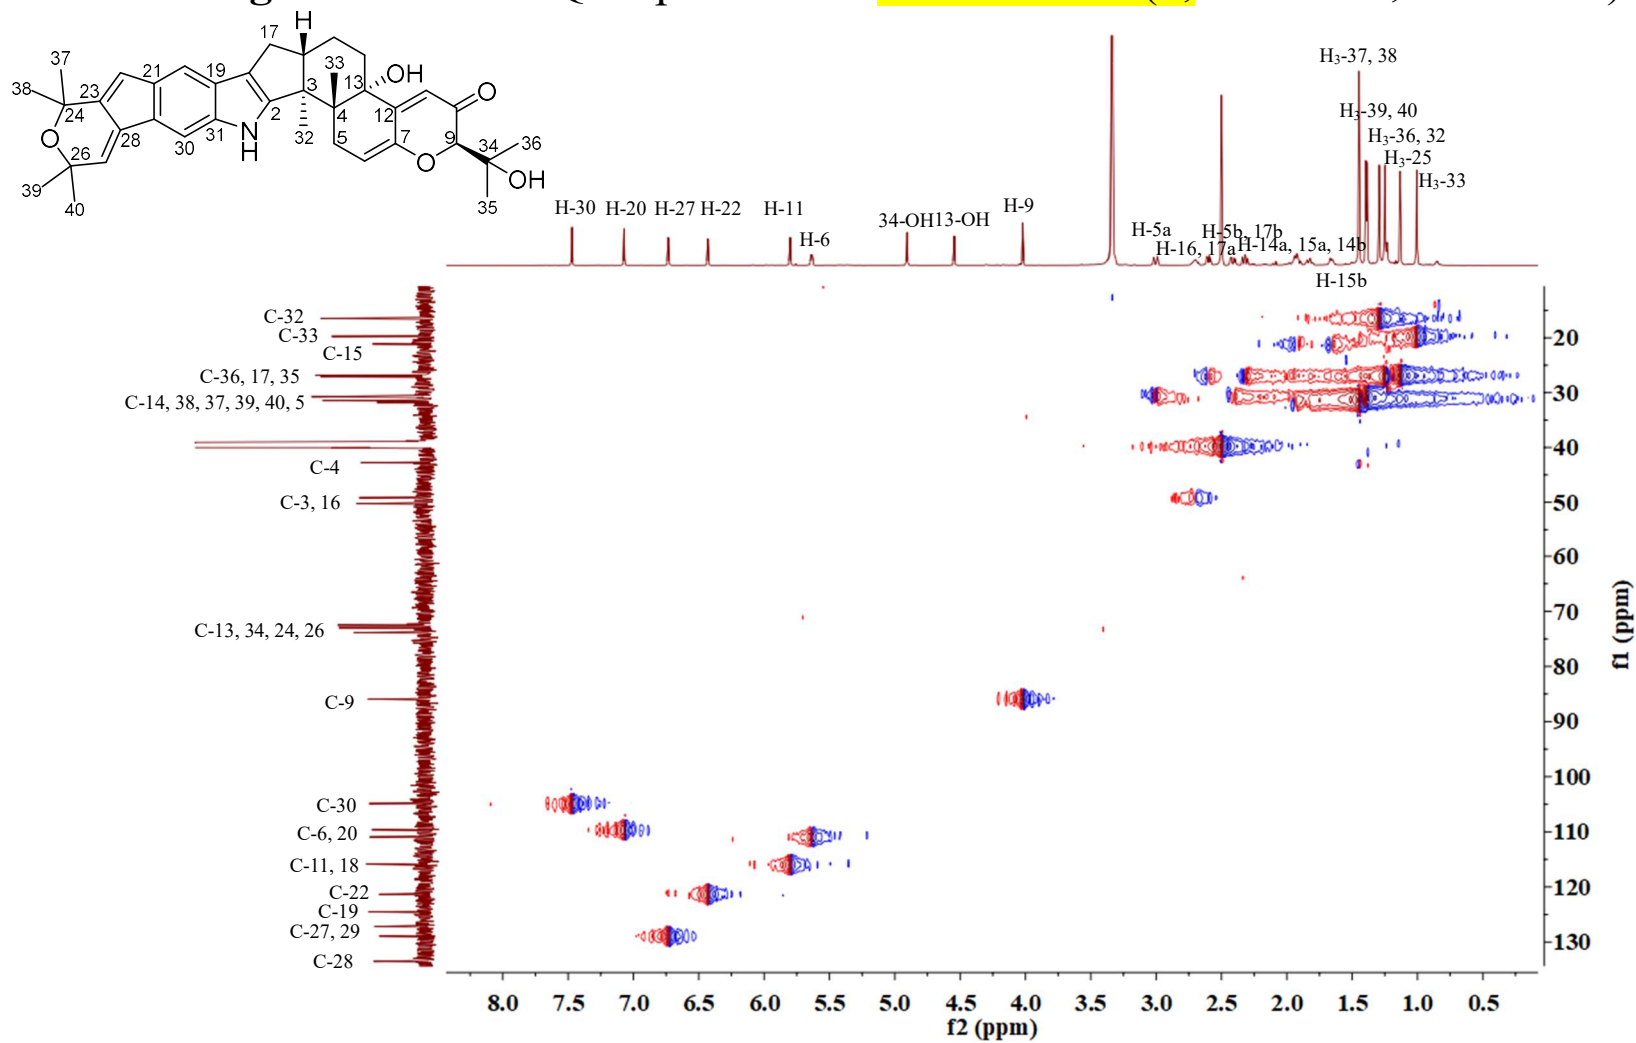

**Figure S36.**  $^1\text{H}$ - $^1\text{H}$  COSY Spectrum of Shearinine X (5; 600 MHz,  $\text{DMSO-}d_6$ )

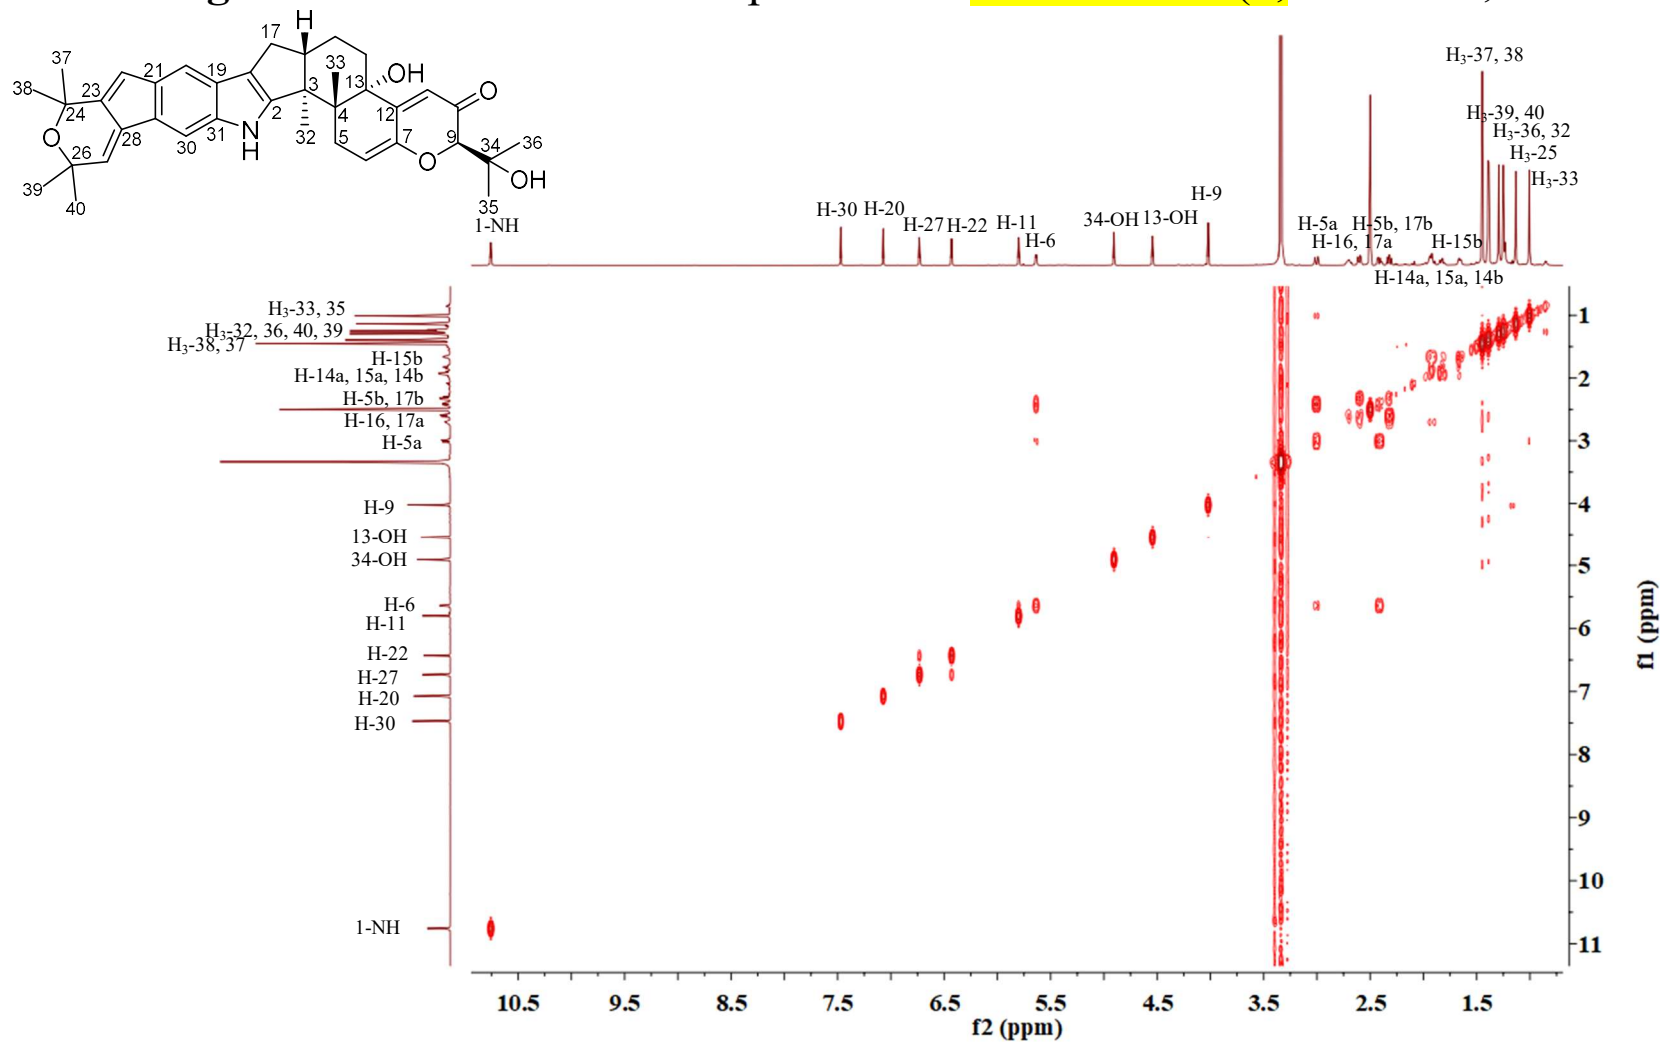

**Figure S37.** HMBC Spectrum of **Shearinine X (5)**; 600 MHz, DMSO-*d*<sub>6</sub>

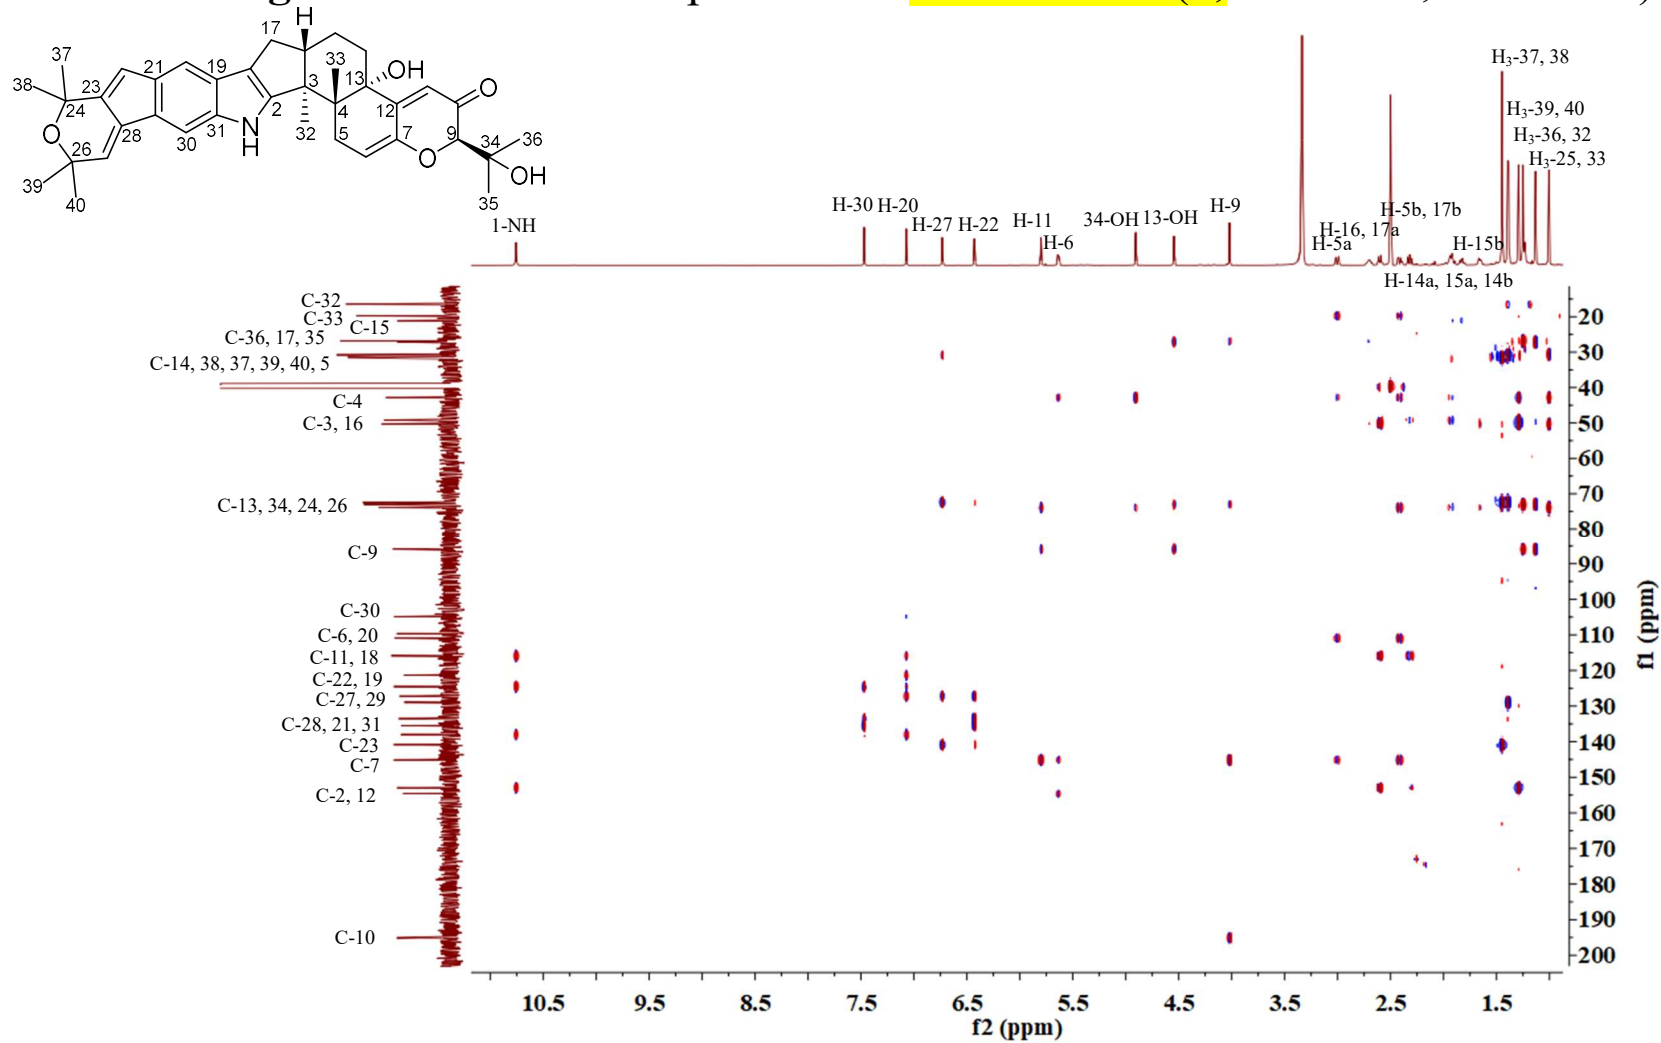

**Figure S38.** NOESY Spectrum of Shearinine X (**5**; 600 MHz, DMSO-*d*<sub>6</sub>)

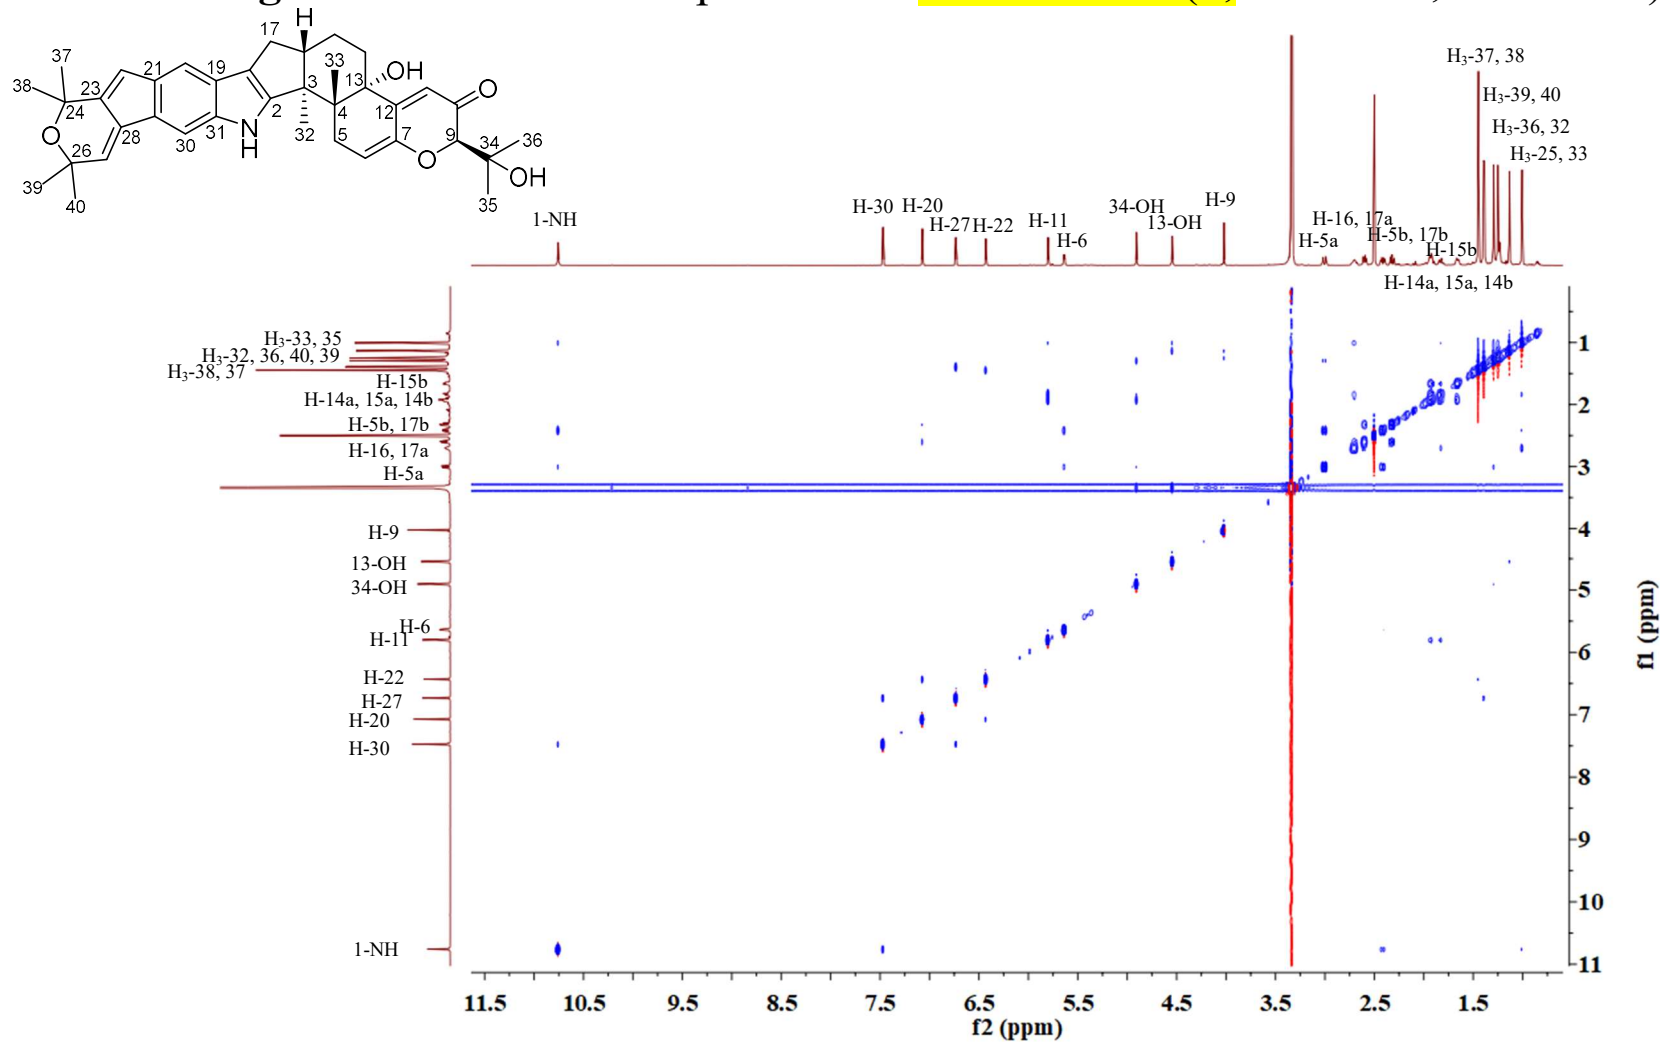

**Figure S39.** HRESIMS Spectrum of Shearinine X (5)

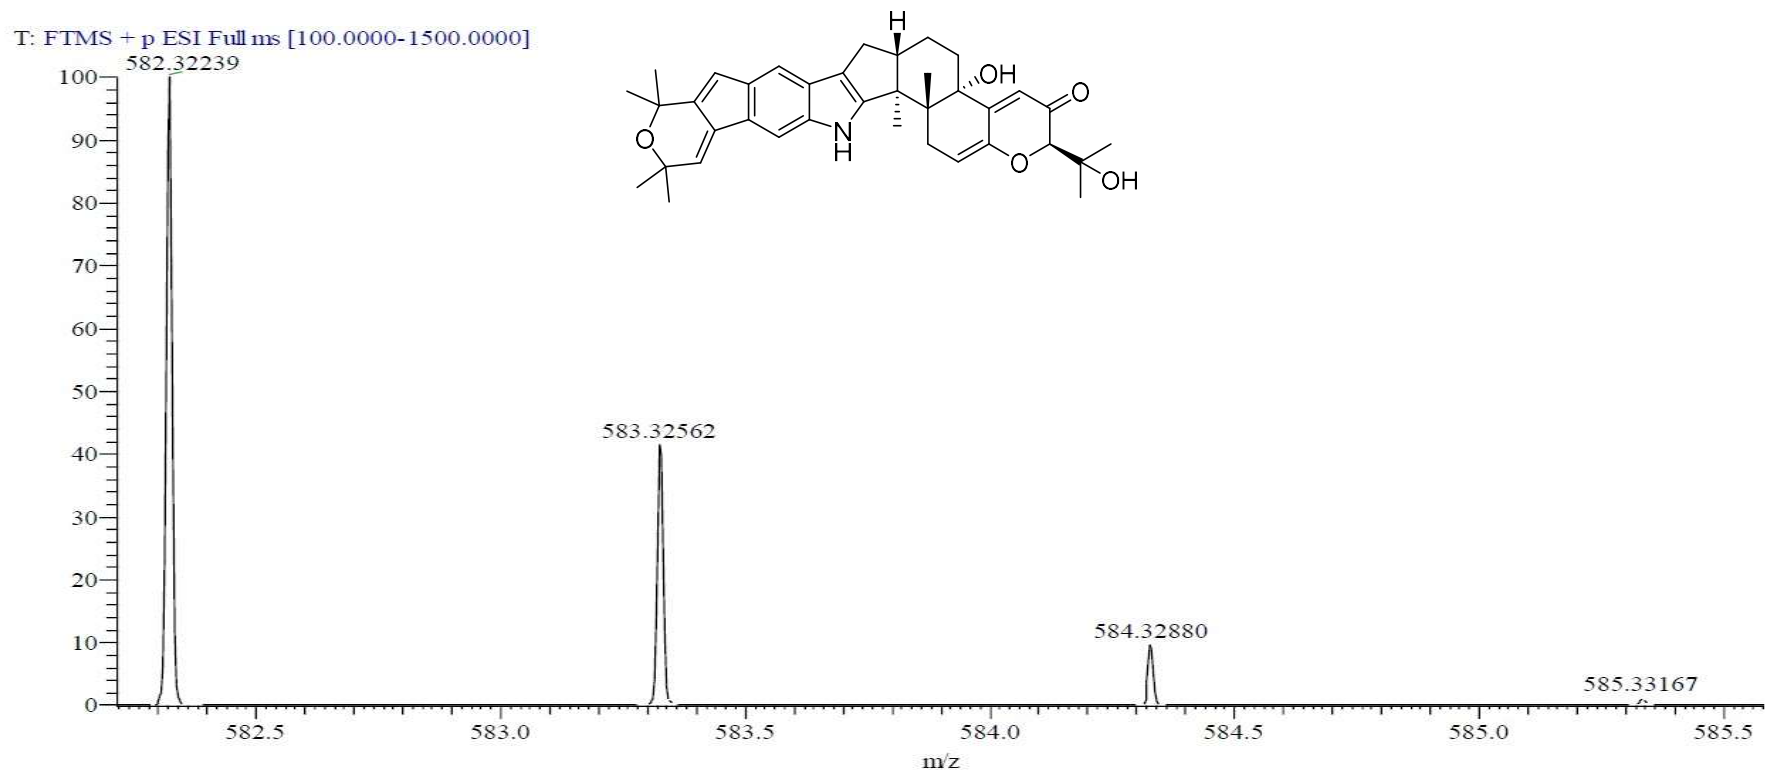



Figure S40. IR Spectrum of Shearinine X (5)

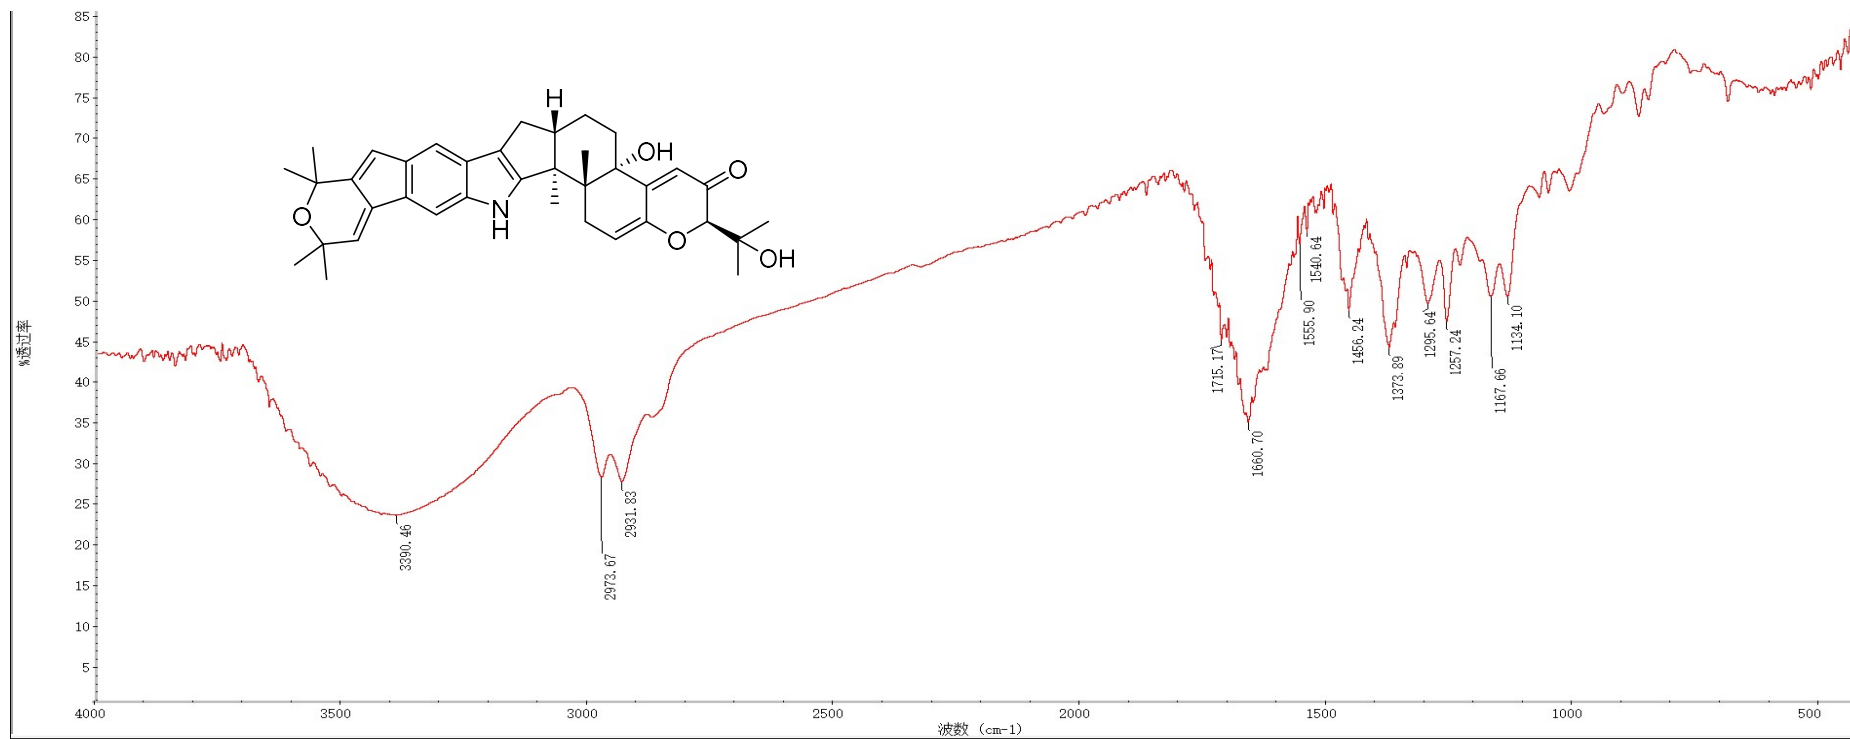

**Figure S41.** UV Spectrum of Shearinine X (5) in MeOH

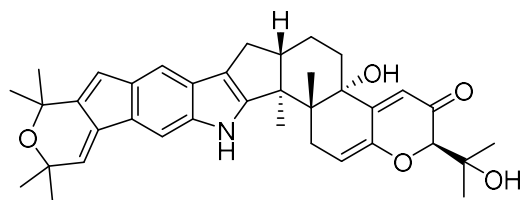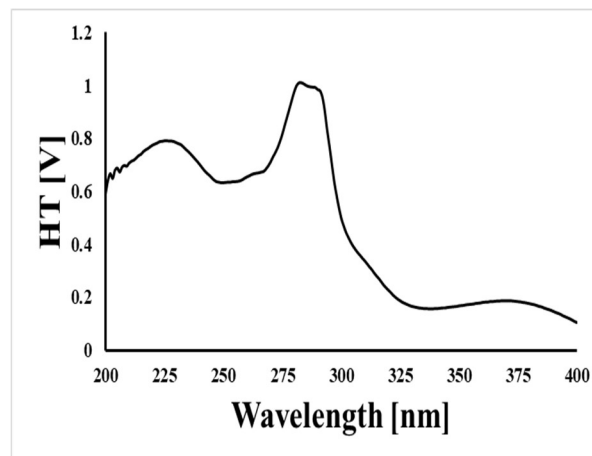

**Figure S42.** ECD Spectrum of Shearinine X (5) in MeOH

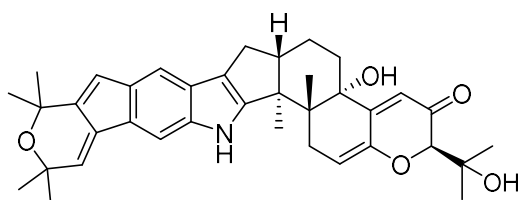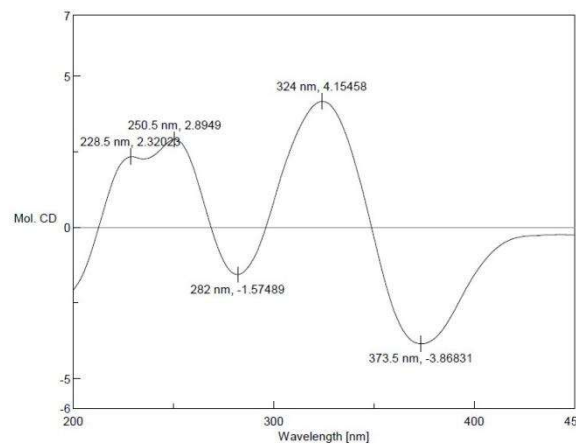

**Figure S43.** Relative Configurations and the Optimized Conformers for **5**

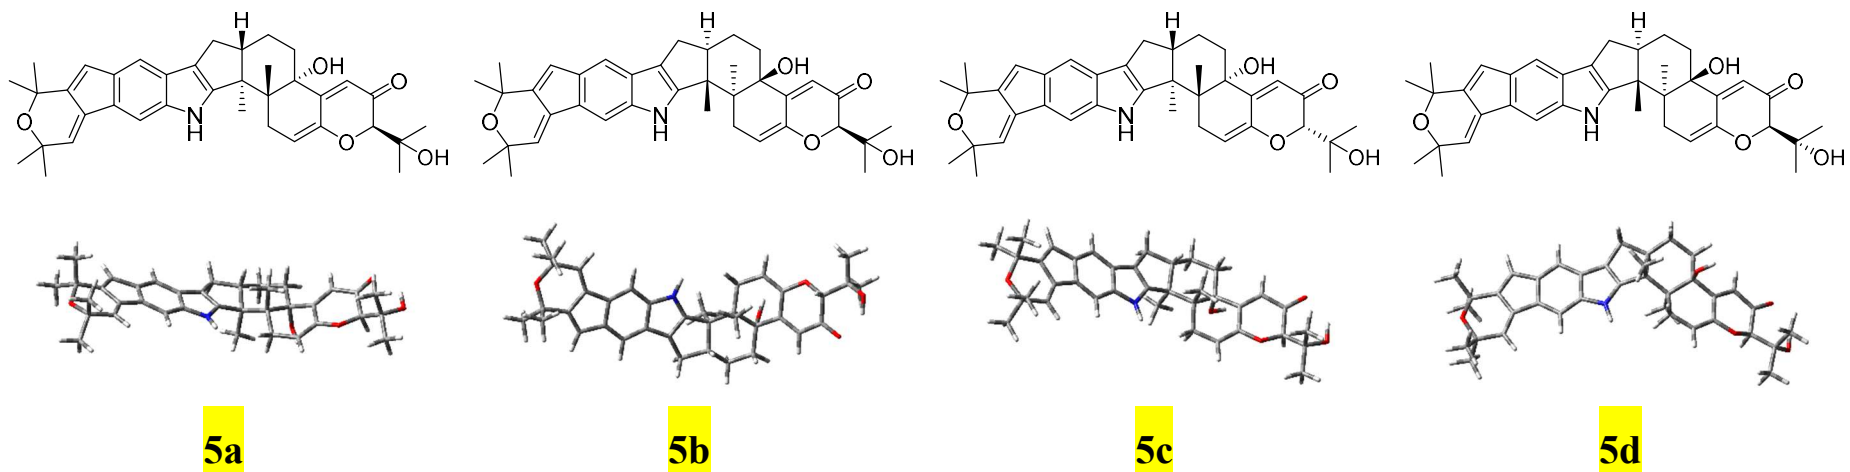

Figure S44. <sup>1</sup>H NMR Spectrum of Shearinine Y (6; 600 MHz, DMSO-*d*<sub>6</sub>)

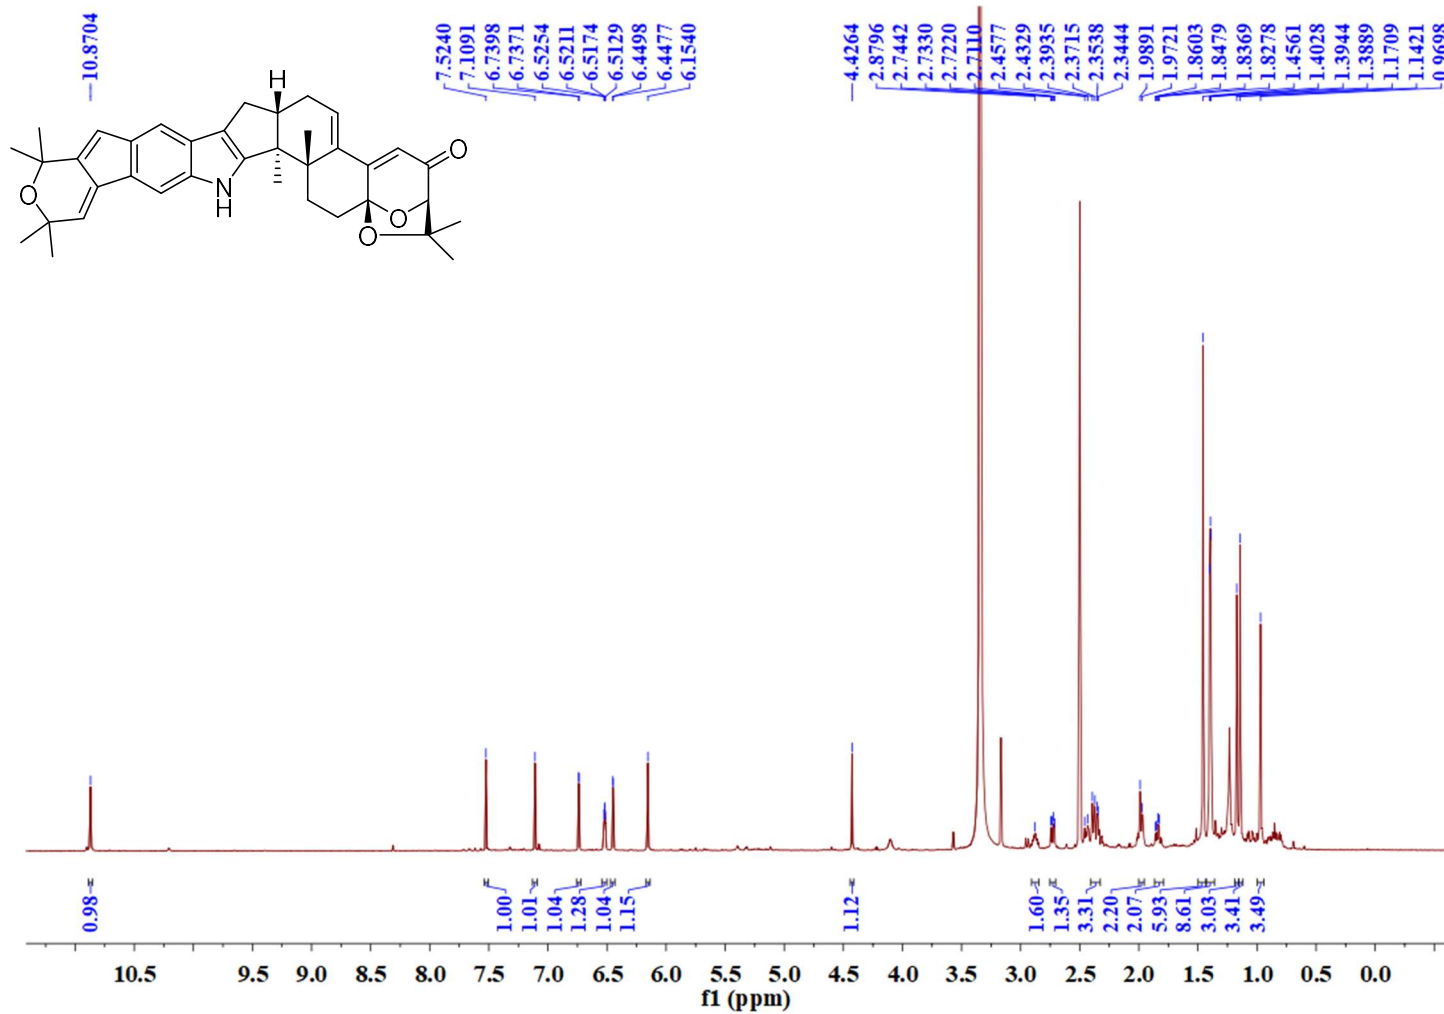

**Figure S45.**  $^{13}\text{C}$  NMR Spectrum of Shearinine Y (**6**; 150 MHz,  $\text{DMSO-}d_6$ )

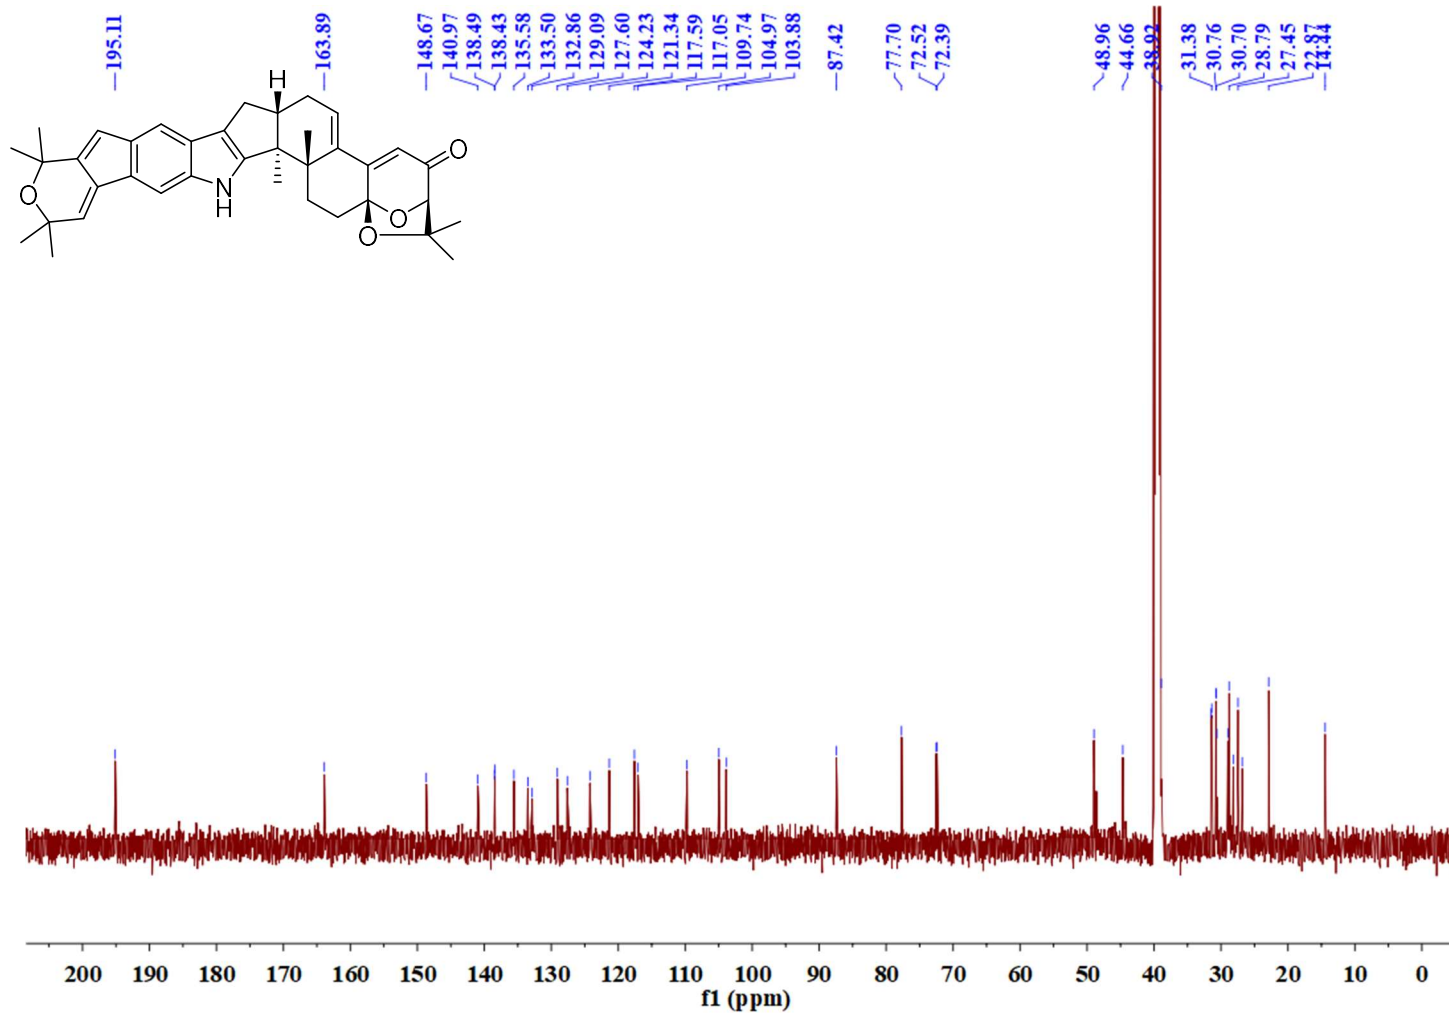

**Figure S46.** HSQC Spectrum of Shearinine Y (6; 600 MHz, DMSO-*d*<sub>6</sub>)

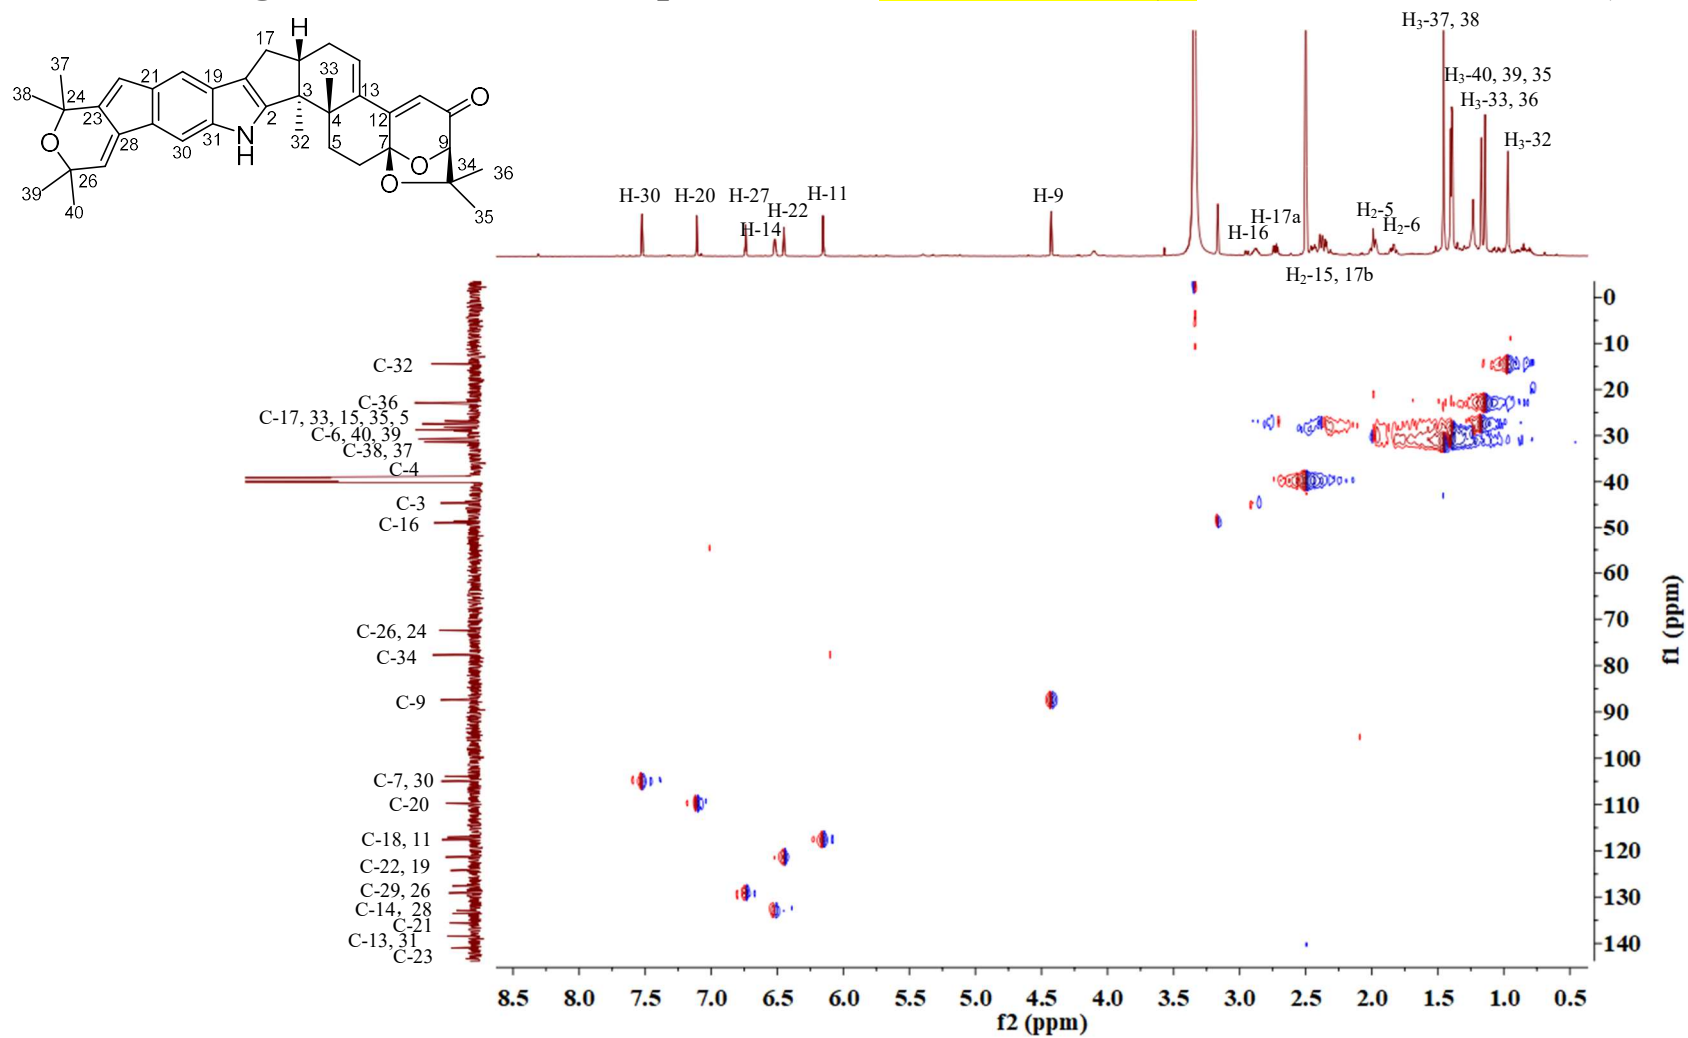

**Figure S47.**  $^1\text{H}$ - $^1\text{H}$  COSY Spectrum of Shearinine Y (6; 600 MHz,  $\text{DMSO-}d_6$ )

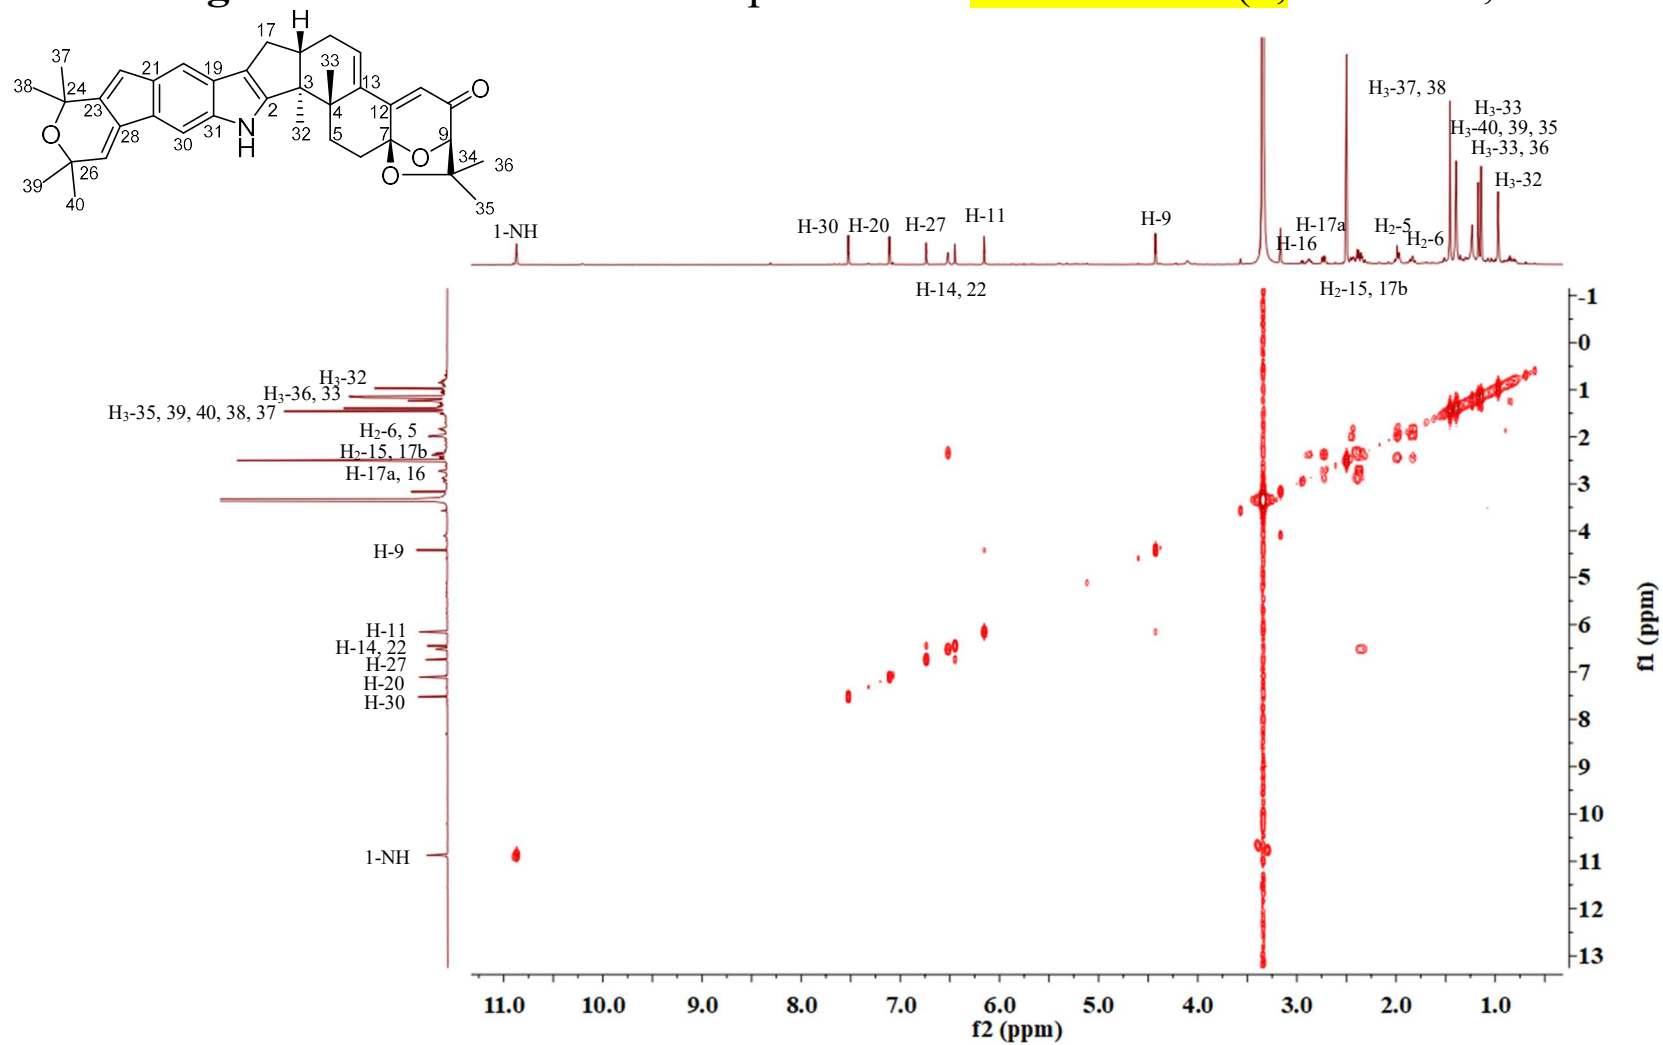

**Figure S48.** HMBC Spectrum of **Shearinine Y (6)**; 600 MHz, DMSO-*d*<sub>6</sub>)

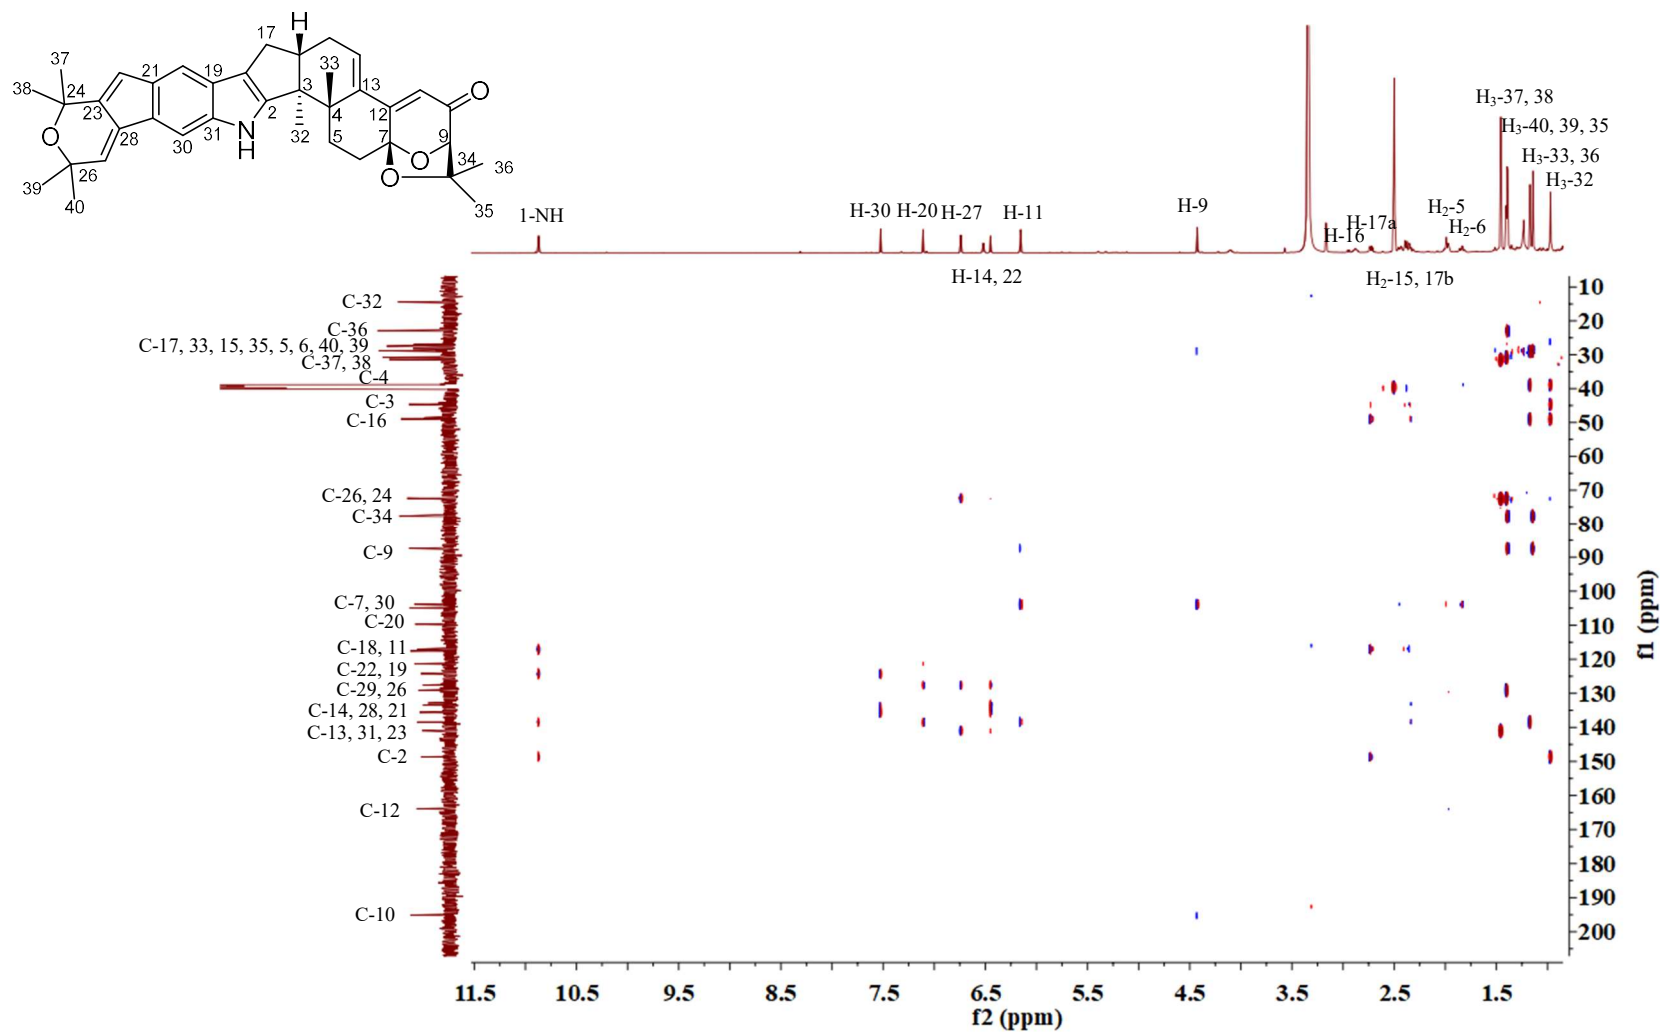



**Figure S49.** NOESY Spectrum of Shearinine Y (**6**; 600 MHz, DMSO-*d*<sub>6</sub>)

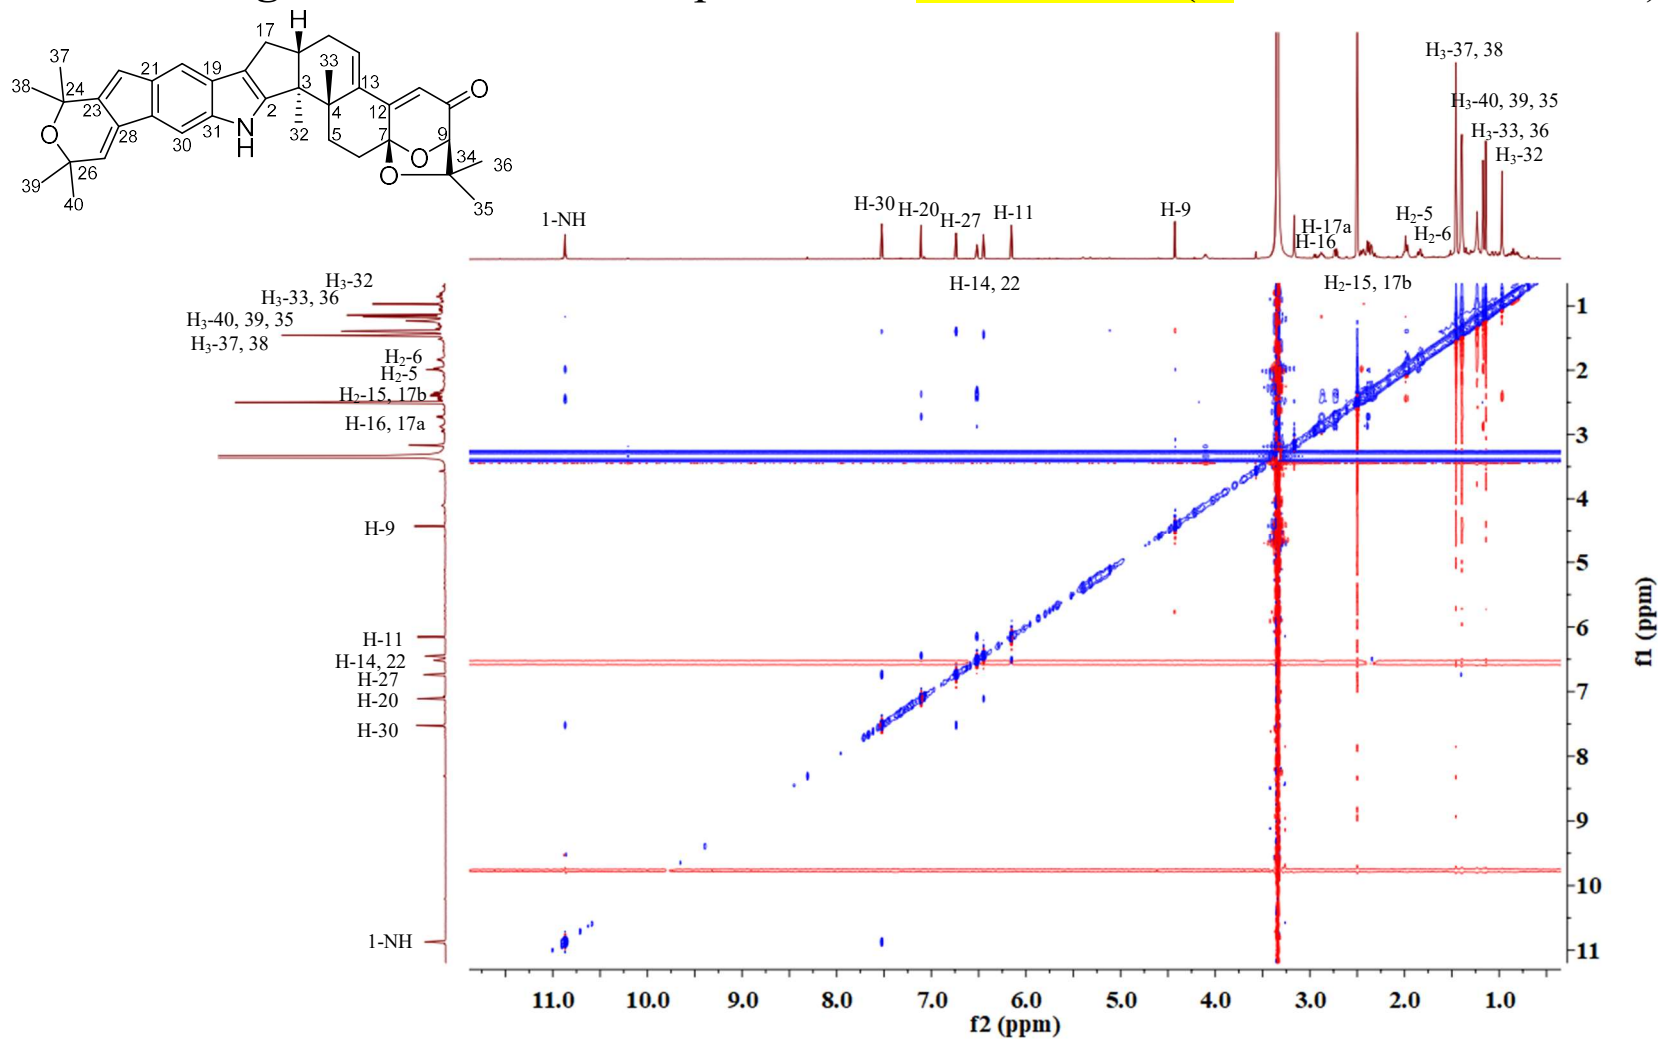

**Figure S50.** HRESIMS Spectrum of Shearinine Y (6)

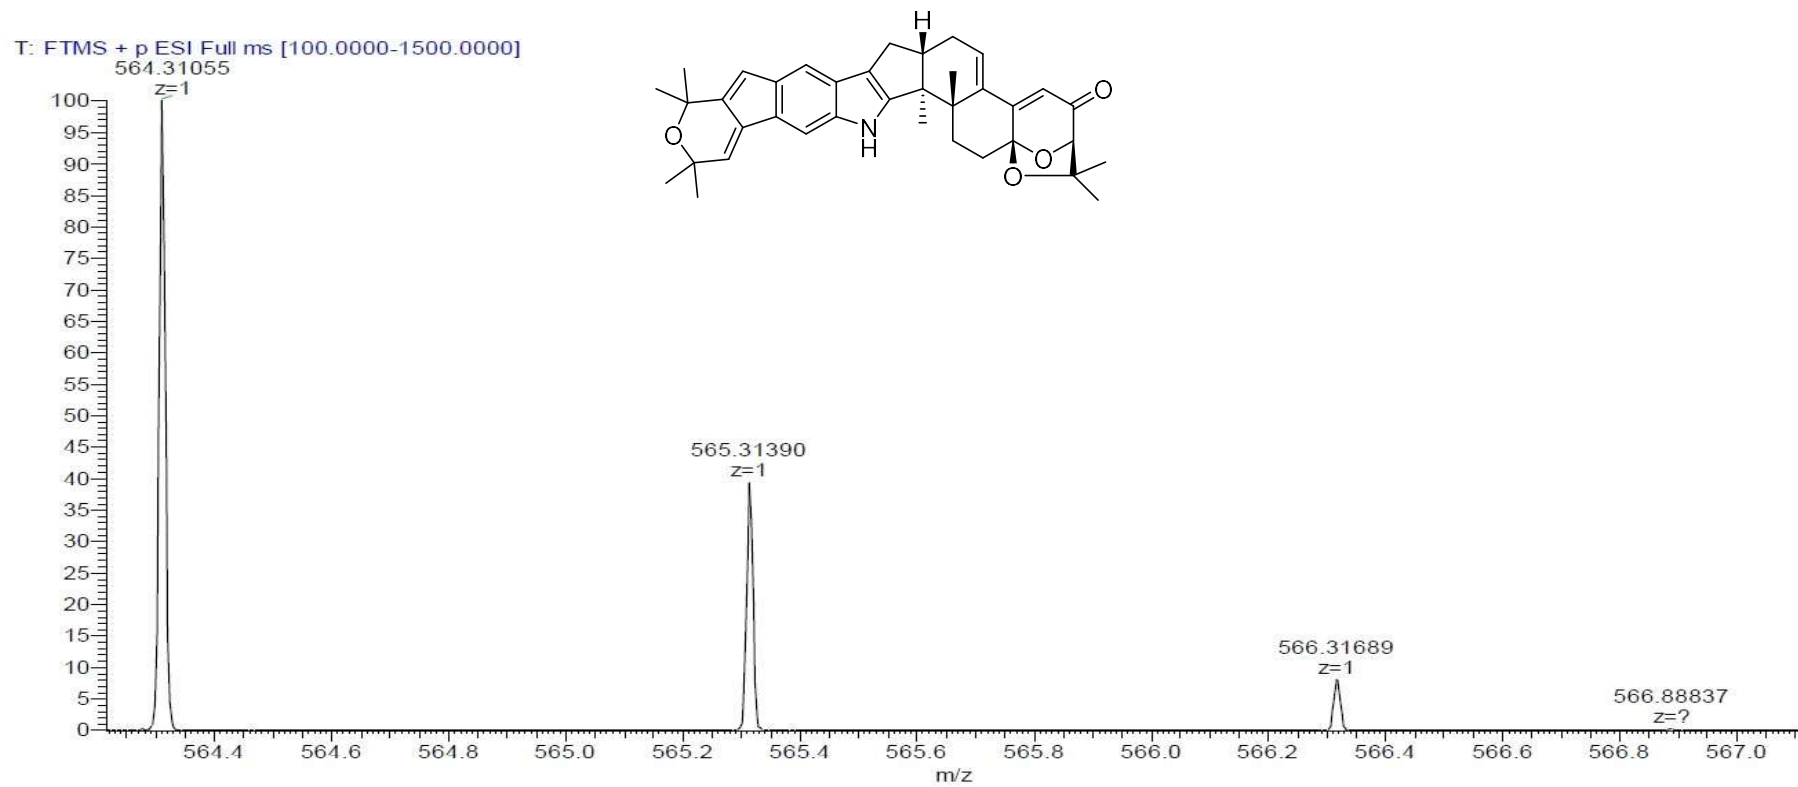

Figure S51. IR Spectrum of Shearinine Y (6)

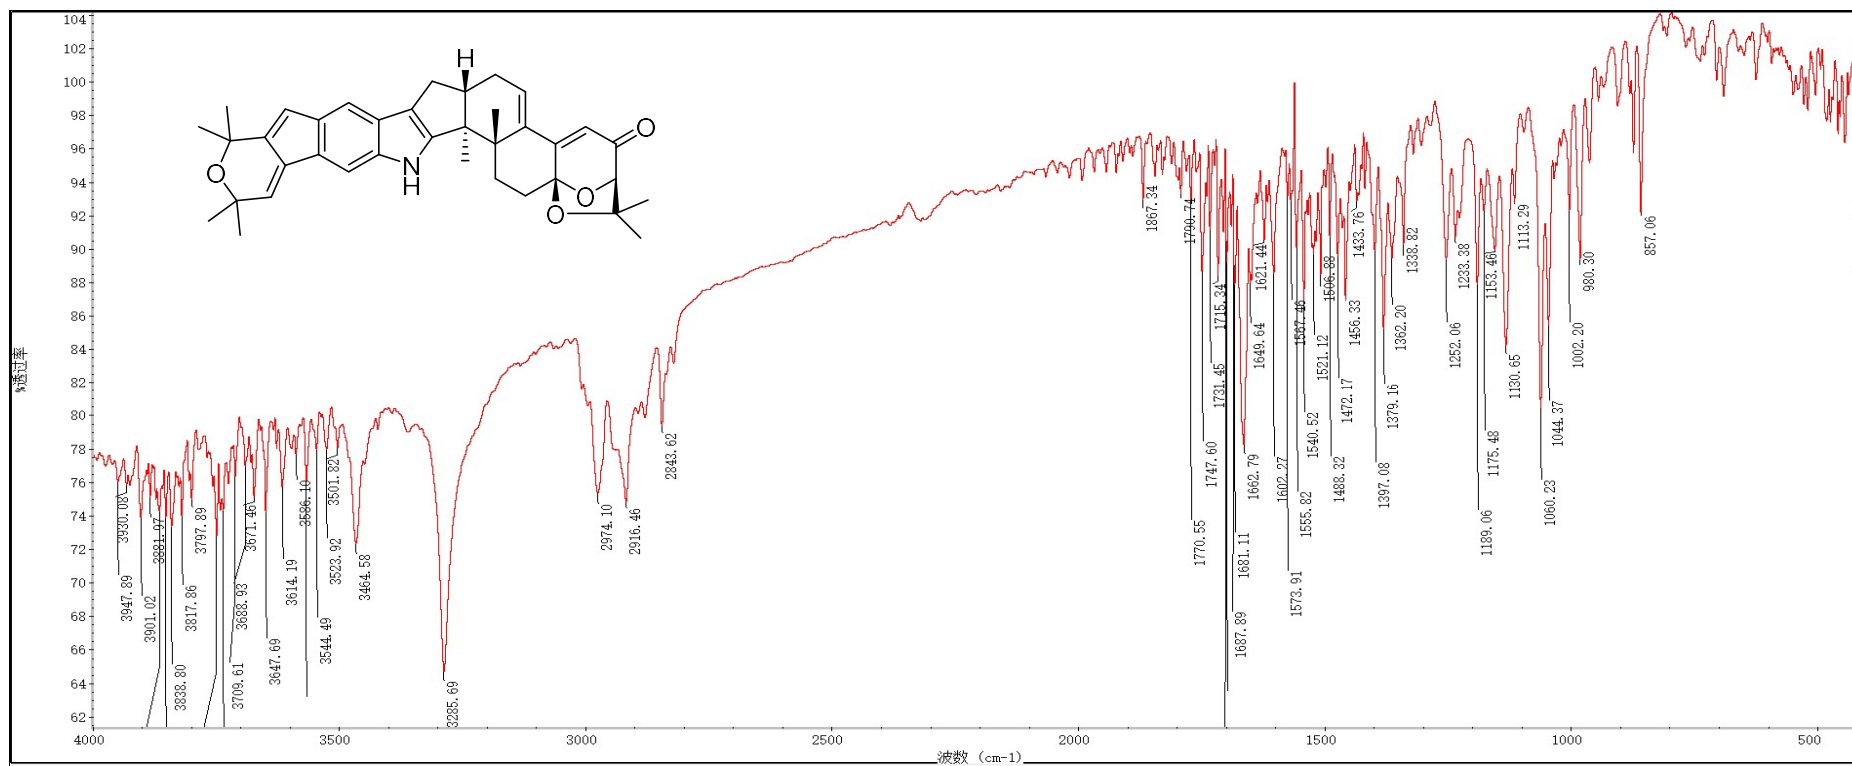

**Figure S52.** UV Spectrum of Shearinine Y (6) in MeOH

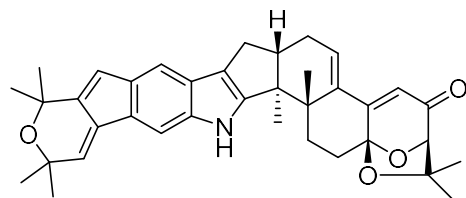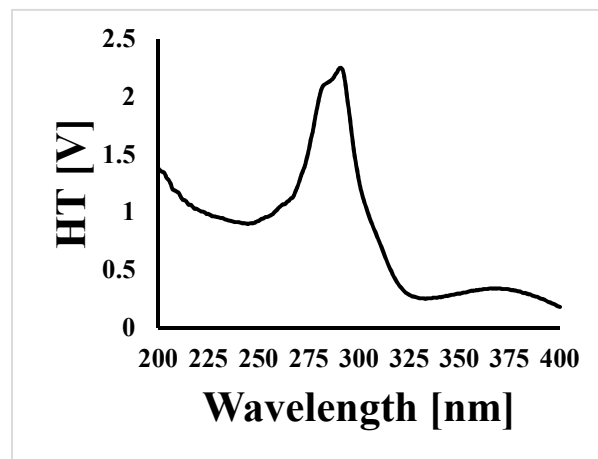

**Figure S53.** ECD Spectrum of Shearinine Y (6) in MeOH

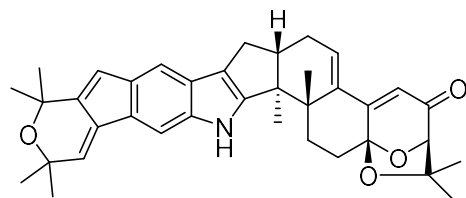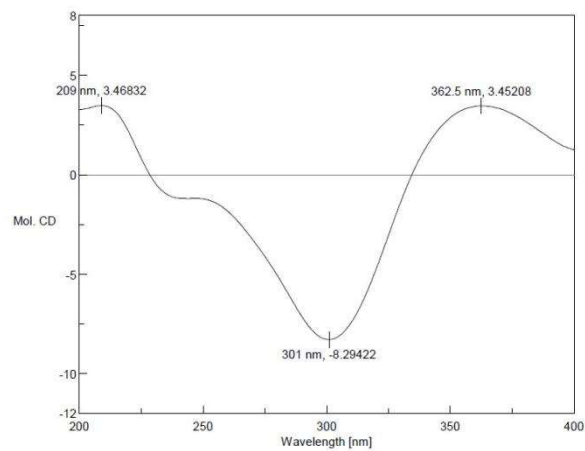

**Figure S54.** Relative Configurations and the Optimized Conformers for **6**

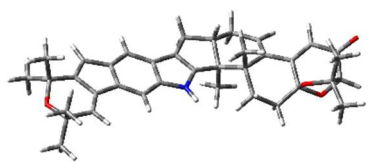

**6a**

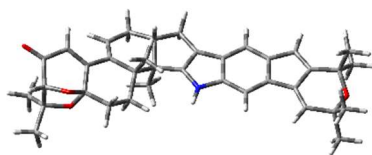

**6b**

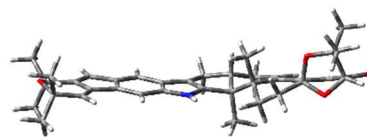

**6c**

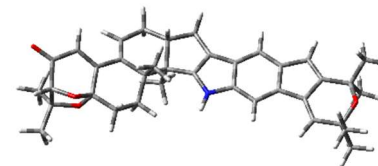

**6d**

Figure S55. <sup>1</sup>H NMR Spectrum of 22,23-Dehydro-shearinine A (1); 600 MHz, CDCl<sub>3</sub>

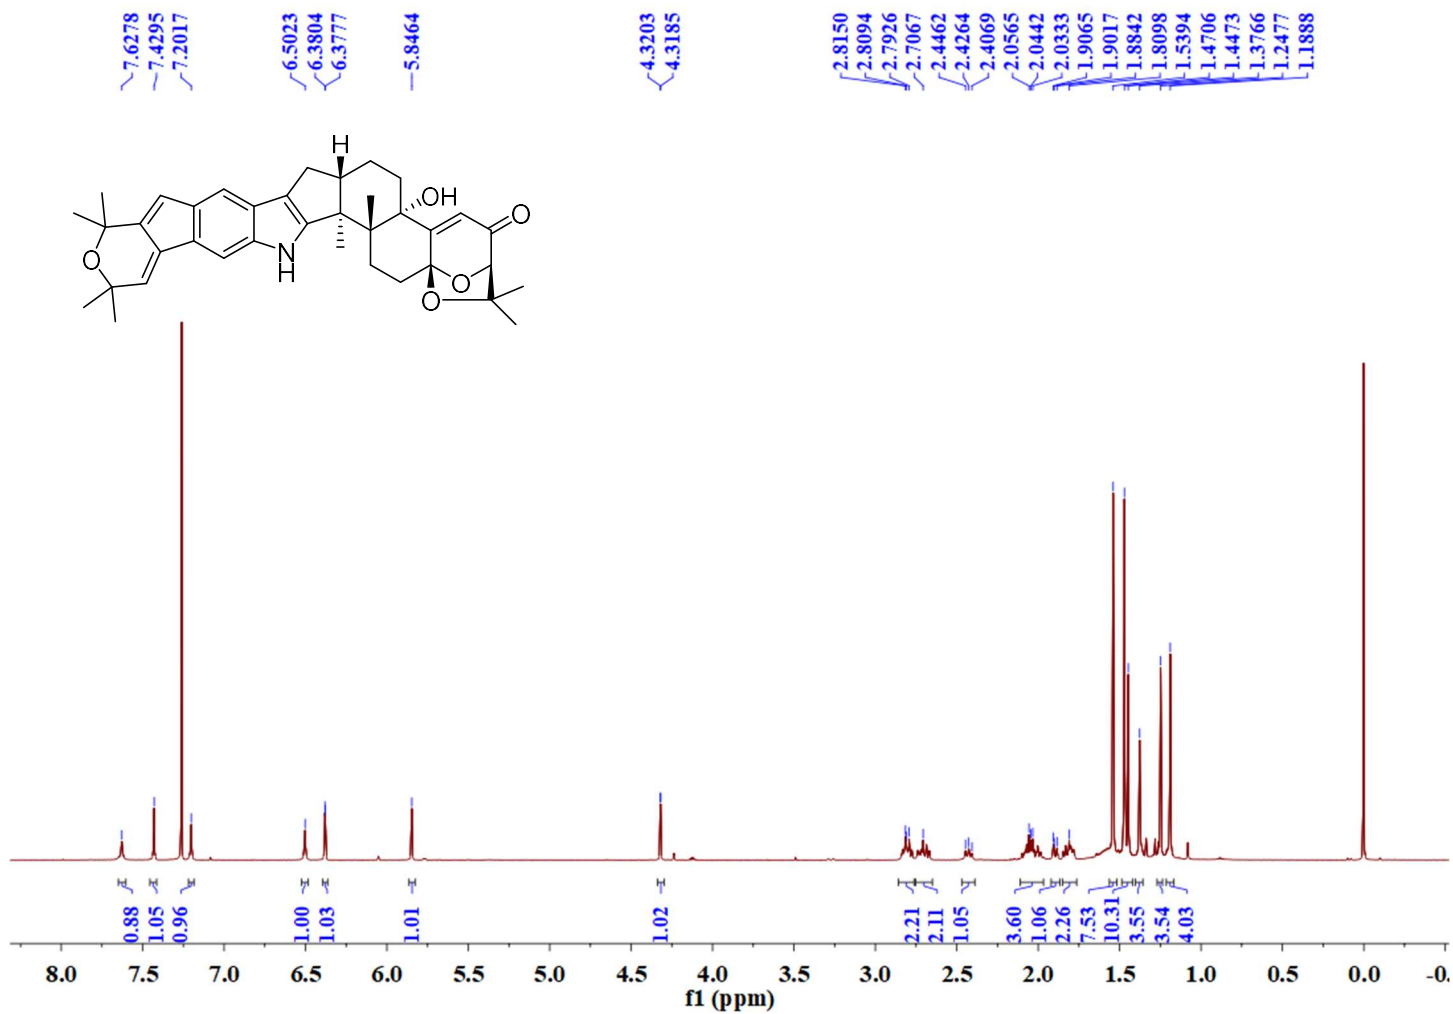

Figure S56. <sup>1</sup>C NMR Spectrum of 22,23-Dehydro-shearinine A (1; 150 MHz, CDCl<sub>3</sub>)

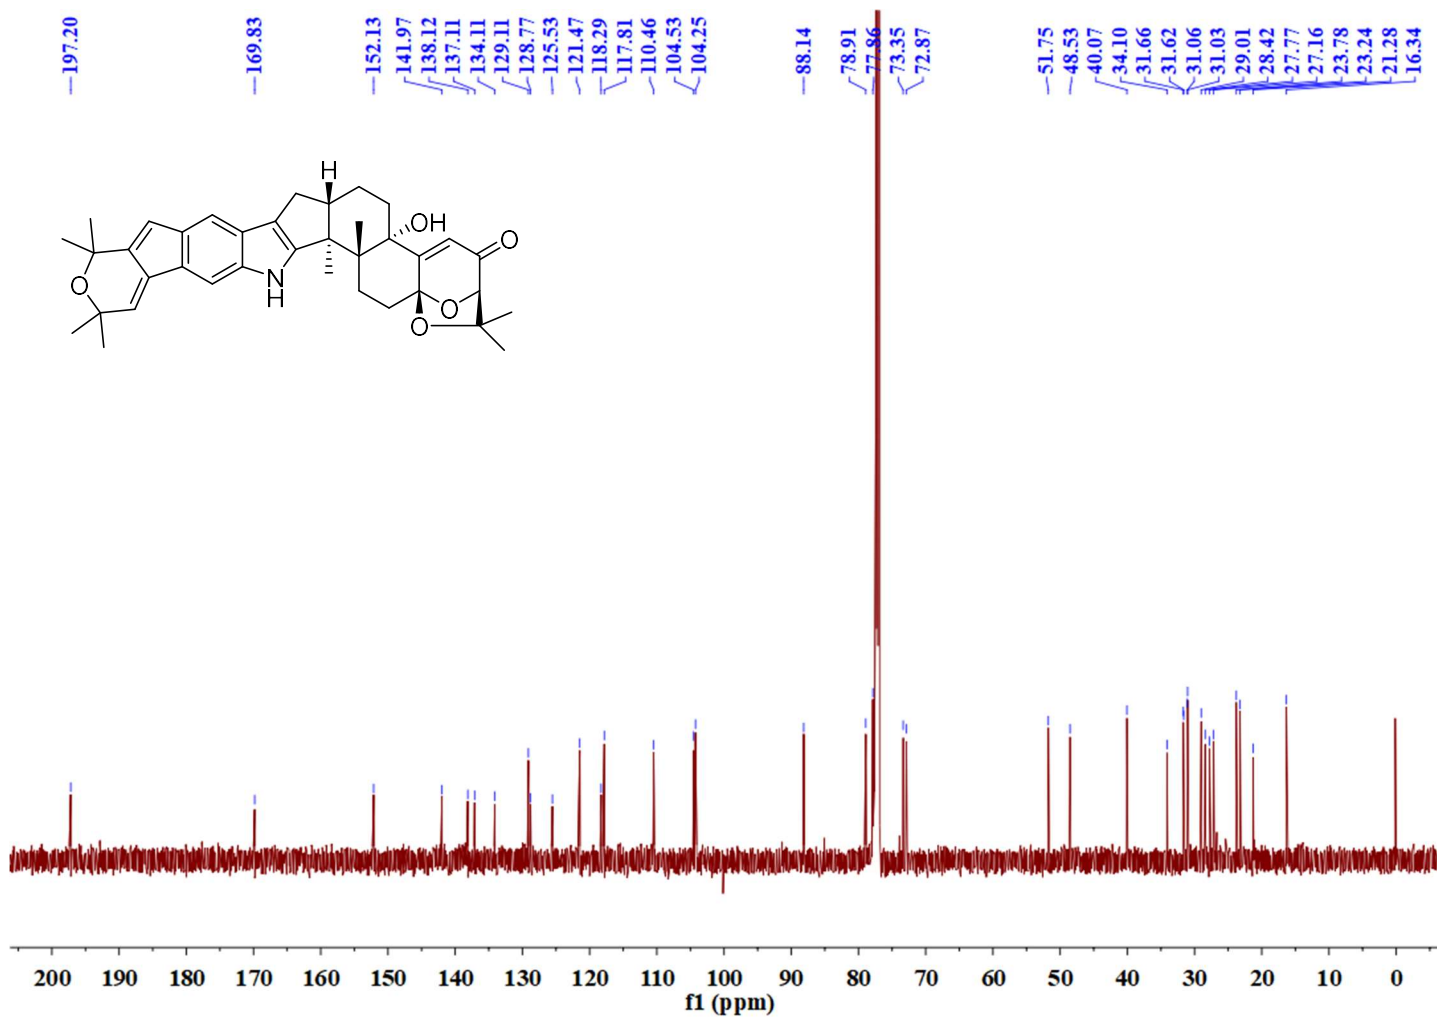

## Scheme S1. Hypothetical Biosynthetic Pathways for 1–6

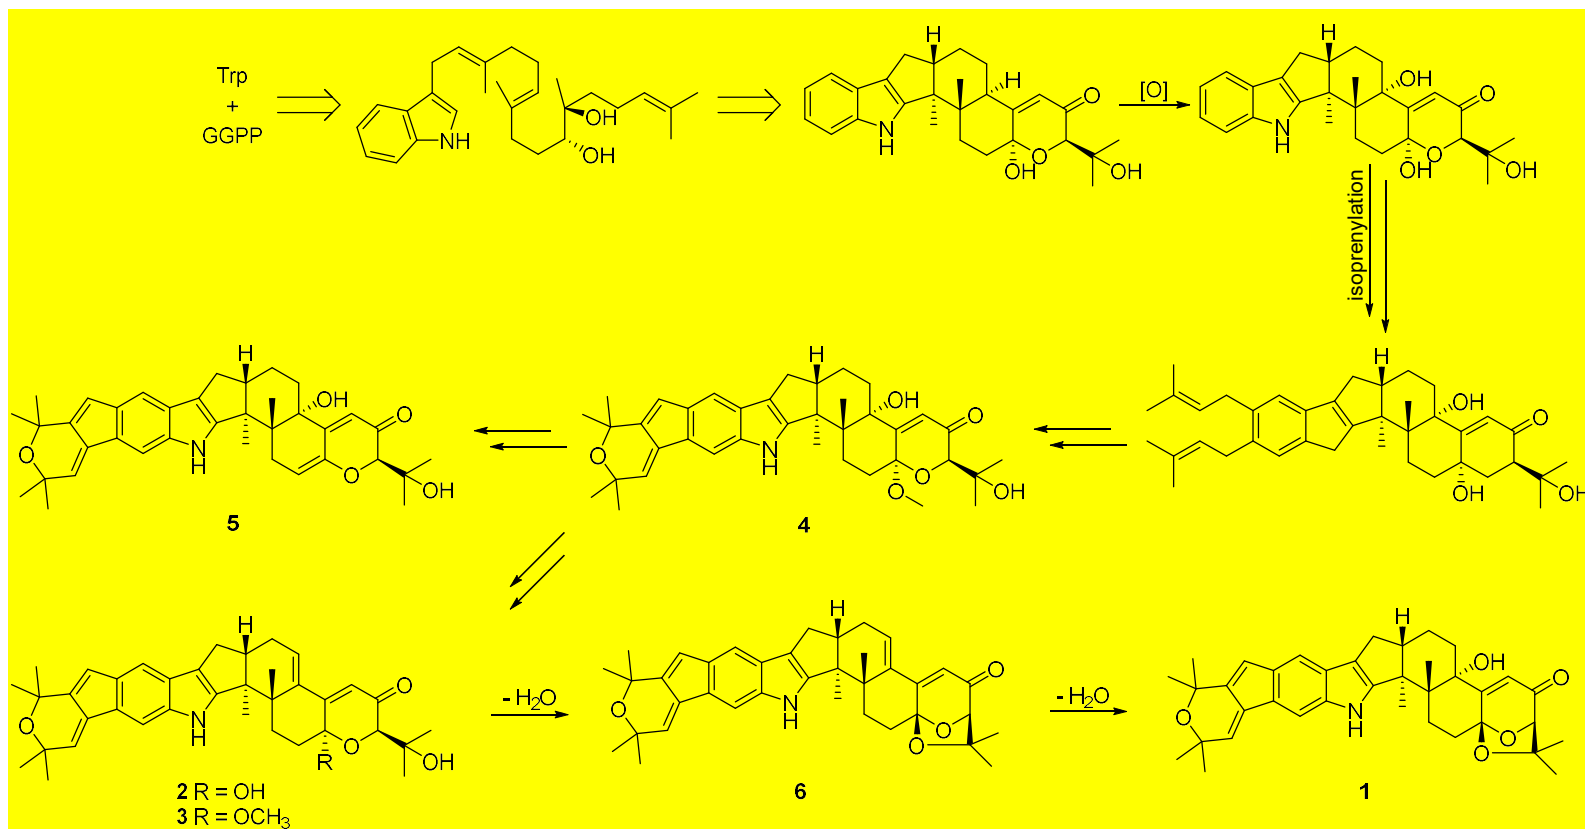

Supplement: d4ra08249d1.pdf [file d4ra08249d1.pdf]
